# Supplementary material for: Organocatalytic synthesis of spiro compounds via a cascade Michael–Michael-aldol reaction
Source: Royal Society of Chemistry journal article supplement (doi:10.1039/c0cc01522a), 2010-01-01
Supplement: c0cc01522a.pdf [file c0cc01522a.pdf]

# Supporting Information

## Organocatalytic synthesis of spiro compounds via a cascade Michael-Michael-Aldol reaction.

Xavier Companyó<sup>a</sup>, Alex Zea<sup>a</sup>, Andrea-Nekane R. Alba<sup>a</sup>, Andrea Mazzanti<sup>b</sup>, Albert Moyano<sup>a</sup> and Ramon Rios<sup>\*a,c</sup>

### CONTENTS

|                                   |    |
|-----------------------------------|----|
| General methods .....             | 2  |
| Screenings .....                  | 3  |
| General procedure .....           | 5  |
| Compounds .....                   | 5  |
| NMR spectra and HPLC traces ..... | 10 |

### General methods.

Chemicals and solvents were either purchased *puriss p.A.* from commercial suppliers or purified by standard techniques. For thin-layer chromatography (TLC), silica gel plates Merck 60 F254 were used and compounds were visualized by irradiation with UV light and/or by treatment with a solution of phosphomolybdic acid (25 g),  $\text{Ce}(\text{SO}_4)_2 \cdot \text{H}_2\text{O}$  (10 g), conc.  $\text{H}_2\text{SO}_4$  (60 mL), and  $\text{H}_2\text{O}$  (940 mL) followed by heating or by treatment with a solution of *p*-anisaldehyde (23 mL), conc.  $\text{H}_2\text{SO}_4$  (35 mL), acetic acid (10 mL), and ethanol (900 mL) followed by heating. Flash chromatography was performed using silica gel Merck 60 (particle size 0.040-0.063 mm),  $^1\text{H}$  NMR,  $^{19}\text{F}$  NMR and  $^{13}\text{C}$  NMR spectra were recorded on Varian AS 400. Chemical shifts are given in ppm relative to tetramethylsilane (TMS) and the coupling constants  $J$  are given in Hz. The spectra were recorded in  $\text{CDCl}_3$  as solvent at room temperature. TMS served as internal standard ( $\delta = 0$  ppm) for  $^1\text{H}$  NMR,  $\text{CDCl}_3$  was used as internal standard ( $\delta = 77.0$  ppm) for  $^{13}\text{C}$  NMR and TFA was used as external standard for  $^{19}\text{F}$  NMR. High-resolution mass spectra were recorded on a Bruker MicrOTOF spectrometer.

### Catalyst screening

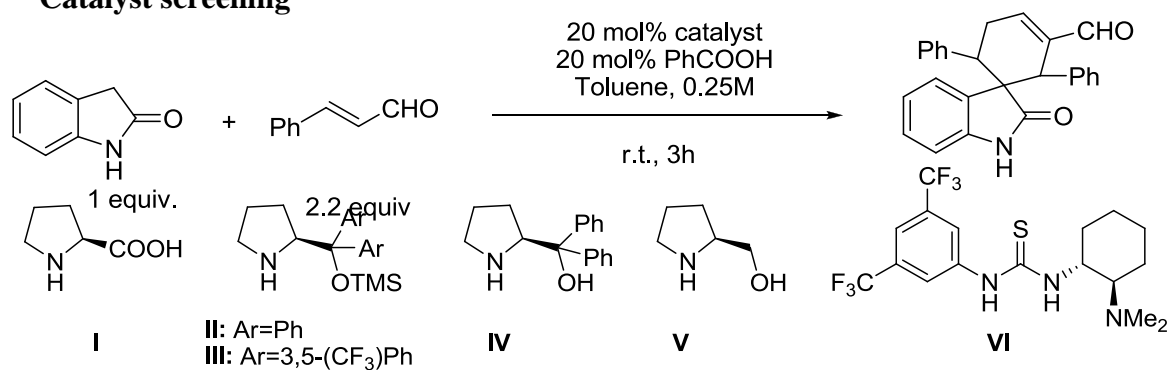

| Entry | Catalyst | Conversion (3h) | d.r.  | e.e  |
|-------|----------|-----------------|-------|------|
| 1     | I        | --              | --    | --   |
| 2     | II       | 100%            | >25:1 | >99% |
| 3     | III      | --              | --    | --   |
| 4     | IV       | --              | --    | --   |
| 5     | V        | 15%             | n.d.  | n.d. |
| 6     | VI       | --              | --    | --   |

### Solvent screening

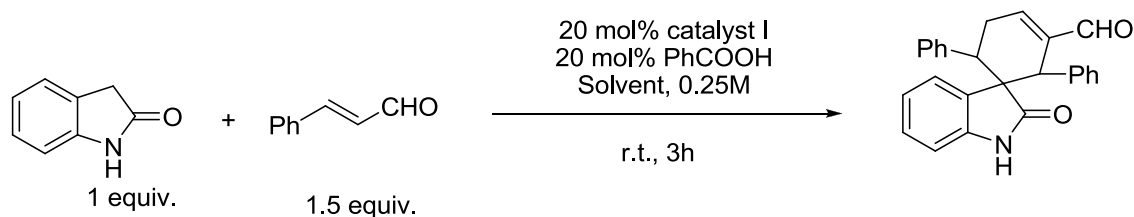

| Entry | Solvent           | Conversion | d.r.  | e.e  |
|-------|-------------------|------------|-------|------|
| 1     | MeCN              | 100%       | 10:1  | >99% |
| 2     | CHCl <sub>3</sub> | 50%        | 18:1  | >99% |
| 3     | Toluene           | 100%       | >25:1 | >99% |
| 4     | MeOH              | Traces     | n.d.  | n.d. |
| 5     | AcOEt             | 54%        | 22:1  | >99% |
| 6     | DMSO              | Traces     | n.d.  | n.d. |

### Additive screening

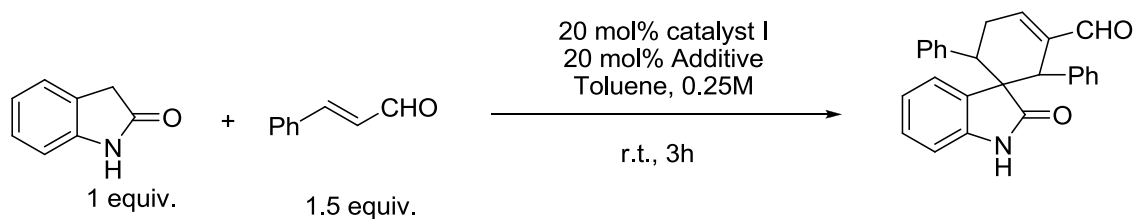

| Entry | Acid       | Conversion | d.r.  | e.e. |
|-------|------------|------------|-------|------|
| 1     | --         | traces     | n.d.  | n.d. |
| 2     | PhCOOH     | 100%       | >25:1 | >99% |
| 2     | 2-F-PhCOOH | 100%       | >25:1 | >99% |
| 3     | 3-F-PhCOOH | 100%       | >25:1 | >99% |
| 4     | 4-F-PhCOOH | 100%       | >25:1 | >99% |

### General Procedure for the synthesis of spiro compounds via a cascade reaction:

In a small flask, oxindole (or heterocycle) (0.25 mmol, 1equiv.) and  $\alpha,\beta$ -unsaturated aldehyde (0.75 mmol, 1.5 equiv.) were stirred in toluene at room temperature in the presence of catalyst **I** (0.05 mmol, 0.2 equiv.) and benzoic acid (0.05 mmol, 0.2 equiv.). The reaction was stirred overnight, monitored by  $^1\text{H-NMR}$ . Then, the crude mixture was purified by column chromatography to afford the spiro compound in yields and stereoselectivities cited in the text.

For racemic compounds, sometimes we run independently reaction using in each one the enantiopure catalyst. The “racemic” mixture was obtained after mixing both isolated products. This method was used when the use of racemic catalysts gave complex mixtures of diastereomers.

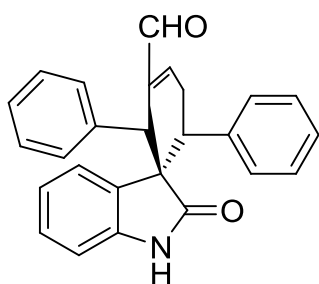

**3a:** Colorless oil.  $^1\text{H-NMR}$  (300 MHz,  $\text{CDCl}_3$ ,  $\text{TMS}_{\text{int}}$ ):  $\delta$ (ppm)= 9.54 (s, 1H), 7.39-7.36 (m, 2H), 7.26 (s, 4H), 6.98 (s, 5H), 6.88 (dt,  $J_1=7.7\text{Hz}$ ,  $J_2=1.2\text{Hz}$ , 1H), 6.51 (m, 1H), 6.45 (dt,  $J_1=7.7\text{Hz}$ ,  $J_2=1.2\text{Hz}$ , 1H), 5.42 (m, 1H), 4.74 (bs, 1H), 3.98 (s, 1H), 3.61 (dd,  $J_1=11.4\text{Hz}$ ,  $J_2=4.8\text{Hz}$ , 1H), 3.52 (m, 1H), 2.94 (dt,  $J_1=19.2\text{Hz}$ ,  $J_2=4.7\text{Hz}$ , 1H).  $^{13}\text{C-NMR}$  (75 MHz,  $\text{CDCl}_3$ ):  $\delta$ (ppm)= 192.5, 179.4, 151.1, 139.7, 139.6, 139.4, 138.8, 128.5, 127.9, 127.6, 127.5, 126.8, 120.7, 108.6, 53.9, 45.3, 41.9, 31.5. **HRMS** [ $\text{M}+\text{H}$ ] $^+$ : Calculated for  $[\text{C}_{26}\text{H}_{22}\text{NO}_2]^+$ : 380.1645; found: 380.1641. **HPLC** (Chiralpak IB $\odot$ ,  $1\text{mLmin}^{-1}$ , Hexane:IPA 90:10,  $254\text{nm}^{-1}$ ):  $t_{\text{R}}$  = 16.1, 21.9 min. **IR** ( $\nu_{\text{max}}$ ,  $\text{cm}^{-1}$ ): 529, 561, 594, 667, 700, 739, 755, 775, 1080, 1112, 1156, 1181, 1232, 1264, 1354, 1408, 1452, 1472, 1484, 1493, 1599, 1619, 1650, 1688, 3028, 3059, 3265.  $[\alpha]_{\text{D}}^{25} = -78.9$  ( $c=0.95$ ,  $\text{CHCl}_3$ ).

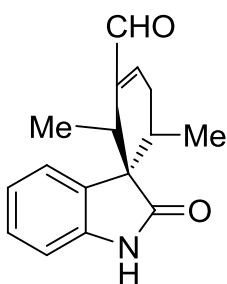

**3b:** Colorless oil.  $^1\text{H-NMR}$  (300 MHz,  $\text{CDCl}_3$ ,  $\text{TMS}_{\text{int}}$ ):  $\delta$ (ppm)= 9.43 (s, 1H), 7.76 (bs, 1H), 7.22 (td,  $J_1=7.7\text{Hz}$ ,  $J_2=1.0\text{Hz}$ , 1H), 7.15 (d,  $J=7.5\text{Hz}$ , 1H), 7.02 (td,  $J_1=7.5\text{Hz}$ ,  $J_2=1.0\text{Hz}$ , 1H), 6.94 (t,  $J=3.7\text{Hz}$ , 1H), 6.87 (d,  $J=7.7\text{Hz}$ , 1H), 2.82 (q,  $J=7.1\text{Hz}$ , 1H), 2.69-2.62 (m, 2H), 2.52-2.42 (m, 1H), 1.18 (d,  $J=7.1\text{Hz}$ , 3H), 0.73 (d,  $J=6.7\text{Hz}$ , 3H).  $^{13}\text{C-NMR}$  (75 MHz,  $\text{CDCl}_3$ ):  $\delta$ (ppm)= 193.4, 179.9, 150.8, 142.8, 140.7, 130.0, 127.9, 125.7, 121.6, 109.5, 53.5, 32.4, 32.2, 29.0, 17.6, 16.4. **HRMS** [ $\text{M}+\text{H}$ ] $^+$ : Calculated for  $[\text{C}_{17}\text{H}_{20}\text{NO}_2]^+$ : 270.1489; found: 270.1492. **HPLC** (Chiralpak IB $\odot$ ,  $1\text{mLmin}^{-1}$ , Hexane:IPA 90:10,  $254\text{nm}^{-1}$ ):  $t_{\text{R}}$  = 10.64, 11.67 min. **IR** ( $\nu_{\text{max}}$ ,  $\text{cm}^{-1}$ ): 639, 708, 757, 806, 976, 1023, 1072, 1102, 1165, 1190, 1234, 1261, 1379, 1471, 1485, 1618, 1687, 2926, 3255.  $[\alpha]_{\text{D}}^{25} = +60.7$  ( $c=0.15$ ,  $\text{CHCl}_3$ ).

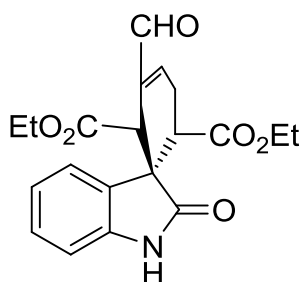

**3c:** Colorless oil.  $^1\text{H-NMR}$  (300 MHz,  $\text{CDCl}_3$ ,  $\text{TMS}_{\text{int}}$ ):  $\delta(\text{ppm})$ = 9.51 (s, 1H), 7.69 (s, 1H), 7.22 (m, 2H), 6.96 (m, 1H), 6.86 (d,  $J_1=7.9\text{Hz}$ , 1H), 3.85 (m, 4H), 3.61 (s, 1H), 3.26 (qt,  $J_1=11.1\text{Hz}$ ,  $J_2=2.2\text{Hz}$ , 1H), 2.91 (dt,  $J_1=19.9\text{Hz}$ ,  $J_2=5.6\text{Hz}$ , 1H), 1.04 (t,  $J=7.1\text{Hz}$ , 3H), 0.93 (t,  $J=7.1\text{Hz}$ , 3H).  $^{13}\text{C-NMR}$  (75 MHz,  $\text{CDCl}_3$ ):  $\delta(\text{ppm})$ = 192.1, 177.7, 171.8, 170.7, 151.1, 140.8, 136.1, 129.1, 123.7, 121.9, 109.7, 61.2, 60.8, 44.7, 43.3, 30.9, 27.0, 13.7, 13.6. **HRMS**  $[\text{M}+\text{H}]^+$ : Calculated for  $[\text{C}_{20}\text{H}_{22}\text{NO}_6]^+$ : 372.1443; found: 372.1442. **HPLC** (Chiralpak IB@,  $1\text{mLmin}^{-1}$ , Hexane:IPA 90:10,  $254\text{ nm}^{-1}$ ):  $t_{\text{R}}$ = 22.1, 34.9 min. **IR** ( $\nu_{\text{max}}$ ,  $\text{cm}^{-1}$ ): 565, 585, 659, 754, 858, 1022, 1097, 1159, 1179, 1235, 1262, 1315, 1344, 1368, 1473, 1619, 1686, 1719, 2853, 2923, 3295.  $[\alpha]_{\text{D}}^{25}$  = -63.3 ( $c=0.4$ ,  $\text{CHCl}_3$ ).

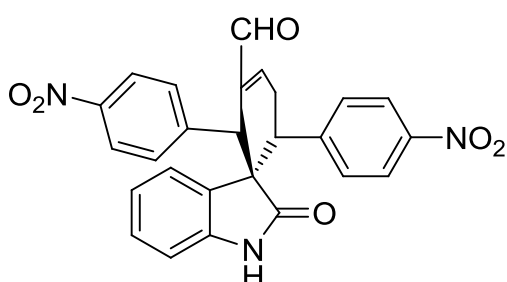

**3d:** Colorless oil.  $^1\text{H-NMR}$  (300 MHz,  $\text{CDCl}_3$ ,  $\text{TMS}_{\text{int}}$ ):  $\delta(\text{ppm})$ = 9.55 (s, 1H), 7.90-7.83 (m, 5H), 7.48-7.43 (m, 2H), 7.16 (d,  $J=8.5\text{Hz}$ , 3H), 7.01-6.93 (m, 2H), 6.61 (d,  $J=7.8\text{Hz}$ , 1H), 6.52 (t,  $J=7.8\text{Hz}$ , 1H), 5.47 (d,  $J=7.8\text{Hz}$ , 1H), 4.12 (s, 1H), 3.67-3.61 (m, 1H), 3.61-3.50 (m, 1H), 3.02 (dt,  $J_1=19.5\text{Hz}$ ,  $J_2=4.7\text{Hz}$ , 1H).  $^{13}\text{C-NMR}$  (75 MHz,  $\text{CDCl}_3$ ):  $\delta(\text{ppm})$ = 193.0, 179.3, 151.9, 147.6, 147.1, 140.6, 131.2, 130.8, 130.5, 130.4, 129.9, 129.6, 127.2, 124.5, 124.4, 124.3, 124.3, 124.2, 124.1, 123.8, 122.5, 110.7, 66.4, 46.1, 43.1, 31.9. **HRMS** (ESI)  $[\text{M}+\text{H}]^+$ : Calculated for  $[\text{C}_{26}\text{H}_{18}\text{N}_3\text{O}_6]^+$ : 468.1201; found: 468.1206. **HPLC** (Chiralpak IB@,  $1\text{mLmin}^{-1}$ , Hexane:IPA 75:25,  $254\text{ nm}^{-1}$ ):  $t_{\text{R}}$ = 25.4, 30.8 min. **IR** ( $\nu_{\text{max}}$ ,  $\text{cm}^{-1}$ ): 560, 598, 655, 698, 733, 853, 901, 973, 1014, 1108, 1156, 1179, 1264, 1341, 1407, 1471, 1514, 1596, 1618, 1682, 2851, 2922, 3058.  $[\alpha]_{\text{D}}^{25}$  = -87.0 ( $c=0.5$ ,  $\text{CHCl}_3$ ).

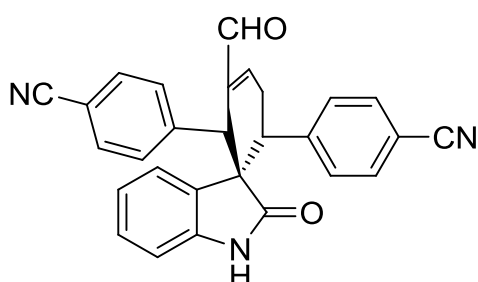

**3e:**  $^1\text{H-NMR}$  (400 MHz,  $\text{CDCl}_3$ ,  $\text{TMS}_{\text{int}}$ ):  $\delta(\text{ppm})$ = 9.54 (s, 1H), 7.50-6.90 (m, xxH), 6.58 (d,  $J=7.9\text{Hz}$ , 1H), 6.52 (t,  $J=7.4\text{ Hz}$ , 1H), 5.41 (d,  $J=7.4\text{ Hz}$ , 1H), 4.05 (s, 1H), 3.58-3.45 (m, 2H), 3.04-2.92 (m, 1H).  $^{13}\text{C-NMR}$  (100 MHz,  $\text{CDCl}_3$ ):  $\delta(\text{ppm})$ = 192.3, 178.8, 151.3, 144.8, 144.3, 139.9, 139.0, 132.1, 132.0, 129.5, 128.9, 127.7, 126.2, 121.5, 118.6, 11.8, 11.3, 109.8, 53.5, 45.4, 42.3, 31.1. **HRMS** (ESI)  $[\text{M}-\text{H}]^-$ : Calculated for  $[\text{C}_{28}\text{H}_{18}\text{N}_3\text{O}_2]^-$ : 428.1405; found: 428.1403. **HPLC**: Chiralcel IB, hexane-IPA 80:20,  $1\text{ mL/min}$ ,  $t_{\text{R}1}$ : 26 min  $t_{\text{R}2}$ : 28 min.

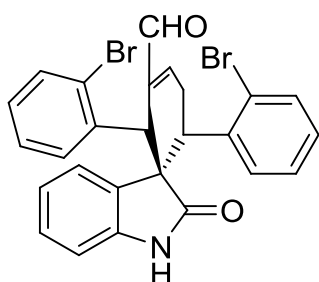

**3f:**  $^1\text{H-NMR}$  (400 MHz,  $\text{CDCl}_3$ ,  $\text{TMS}_{\text{int}}$ ):  $\delta(\text{ppm})$ = 9.54 (s, 1H), 7.50-6.90 (m, xxH), 6.57 (d,  $J=7.7\text{Hz}$ , 1H), 6.44 (t,  $J=7.4\text{ Hz}$ , 1H), 5.68 (d,  $J=7.1\text{ Hz}$ , 1H), 4.69 (s, 1H), 4.44 (dd,  $J=11.7, 5.6\text{ Hz}$ , 1H), 3.45-3.25 (m, 1H), 2.95-2.85 (m, 1H).  $^{13}\text{C-NMR}$  (100 MHz,  $\text{CDCl}_3$ ):  $\delta(\text{ppm})$ = 192.3, 180.0, 151.3, 140.4, 140.2, 139.9, 138.1, 132.9, 132.8, 129.9, 129.5, 129.1, 128.6,

128.2, 128.0, 127.5, 127.1, 125.5, 125.4, 121.5, 108.9, 53.3, 43.9, 39.9, 31.5. **HRMS (ESI) [M+H]<sup>+</sup>**:  
Calculated for [C<sub>26</sub>H<sub>20</sub>Br<sub>2</sub>NO<sub>2</sub>]<sup>+</sup>: 535.9855; found: 535.9848. HPLC: Chiralcel IB, hexane-IPA 90:10, 1  
mL/min, t<sub>r1</sub>: 17. min t<sub>r2</sub>: 37 min.

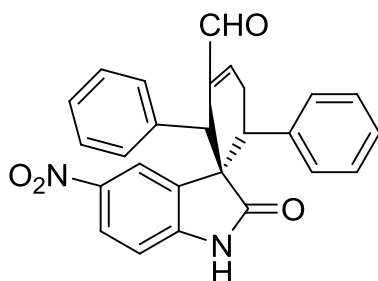

**3g**: Colorless oil. <sup>1</sup>H-NMR (300 MHz. CDCl<sub>3</sub>, TMS<sub>int</sub>): δ(ppm)= 9.74 (s,1H), 8.71 (s, 1H), 8.06 (dd, J<sub>1</sub>= 8.6Hz, J<sub>2</sub>=2.3Hz, 1H), 7.60-7.42 (m, 6H), 7.24-7.10 (m, 5H), 6.81 (d, J=8.6Hz, 1H), 6.4 (d, J=2.3Hz, 1H), 4.21 (s, 1H), 3.89-3.79 (m, 1H), 3.76-3.64 (m, 1H), 3.19 (dt, J<sub>1</sub>=20Hz, J<sub>2</sub>=5.5Hz, 1H), <sup>13</sup>C-NMR (75 MHz. CDCl<sub>3</sub>): δ(ppm)= 192.3, 179.8, 150.8, 145.5, 141.8, 138.9, 138.4, 137.6, 133.4, 132.8,

130.1, 130.1, 128.4, 128.3, 128.2, 127.3, 124.7, 122.6, 108.6, 54.3, 45.1, 41.8, 31.1. **HRMS (ESI) [M+H]<sup>+</sup>**:  
Calculated for [C<sub>26</sub>H<sub>19</sub>N<sub>2</sub>O<sub>4</sub>]<sup>+</sup>: 423.1350; found: 423.1350. HPLC (Chiralpak IA®, 1mLmin<sup>-1</sup>, Hexane:IPA  
90:10, 254 nm<sup>-1</sup>): t<sub>r</sub>= 36.6, 53.1 min. IR (ν<sub>max</sub>, cm<sup>-1</sup>): 701, 736, 758, 1080, 1108, 1158, 1176, 1224, 1335,  
1453, 1481, 1521, 1600, 1624, 1652, 1684, 1716, 2851, 2921. [α]<sub>D</sub><sup>25</sup> = -21.6 (c=0.25, CHCl<sub>3</sub>).

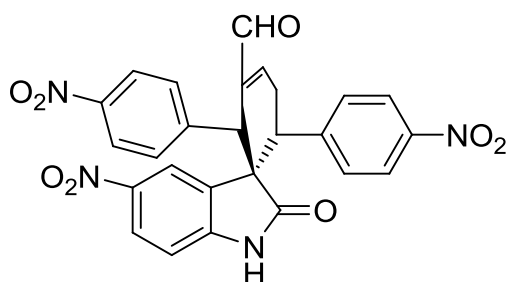

**3h**: Colorless oil. <sup>1</sup>H-NMR (300 MHz. (CD<sub>3</sub>)<sub>2</sub>CO, TMS<sub>int</sub>): δ(ppm)= 9.62 (s, 1H), 8.08-7.92 (m, 2H), 7.97-7.86 (m, 4H), 7.68-7.61 (m, 1H), 7.45-7.39 (m, 3H), 6.85 (d, J=8.6Hz, 1H), 6.38 (d, J=2.2Hz, 1H), 4.28 (s, 1H), 4.13-4.07 (m, 1H), 3.58-3.45 (m, 1H), 3.19 (td, J<sub>1</sub>=20.2Hz, J<sub>2</sub>=5.5Hz, 1H). <sup>13</sup>C-NMR (75 MHz. (CD<sub>3</sub>)<sub>2</sub>CO): δ(ppm)=

193.9, 153.5, 149.3, 149.0, 148.8, 148.4, 143.4, 140.3, 136.1, 131.7, 131.0, 129.6, 127.0, 125.3, 125.0,  
124.9, 124.5, 124.4, 123.7, 111.2, 55.2, 46.3, 43.2, 32.2. **HRMS (ESI) [M+H]<sup>+</sup>**: Calculated for [C<sub>26</sub>H<sub>17</sub>N<sub>4</sub>O<sub>8</sub>]<sup>+</sup>:  
513.1052; found: 513.1043. HPLC (Chiralpak IB®, 1mLmin<sup>-1</sup>, Hexane:IPA 70:30, 254 nm<sup>-1</sup>): t<sub>r</sub>= 33.9, 51.1  
min. IR (ν<sub>max</sub>, cm<sup>-1</sup>): 553, 607, 644, 696, 735, 755, 846, 914, 1013, 1079, 1107, 1177, 1221, 1260, 1337,  
1402, 1450, 1481, 1514, 1597, 1625, 1681, 1720, 2924. [α]<sub>D</sub><sup>25</sup> = -121.5 (c=0.2, CHCl<sub>3</sub>, 88% ee).

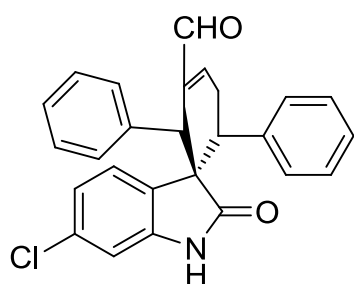

**3i**: Colorless oil. <sup>1</sup>H-NMR (300 MHz. CDCl<sub>3</sub>, TMS<sub>int</sub>): δ(ppm)= 9.52 (s, 1H), 8.32 (s, 1H), 7.42-7.38 (m, 2H), 7.31-7.25 (m, 2H), 7.04-6.89 (m, 7H), 6.55 (d, J=2Hz, 1H), 6.43 (dd, J<sub>1</sub>=7.9Hz, J<sub>2</sub>=2.0Hz, 1H), 5.31 (d, J=8.0Hz, 1H), 3.98 (s, 1H), 3.62-3.54 (m, 1H), 3.54-3.41 (m, 1H), 2.94 (dt, J<sub>1</sub>=19.2Hz, J<sub>2</sub>=4.4Hz, 1H). <sup>13</sup>C-NMR (75 MHz. CDCl<sub>3</sub>): δ(ppm)= 193.7, 181.2, 152.3, 142.2, 140.7, 140.5, 139.7, 134.5, 130.2, 129.6,

129.4, 128.9, 128.8, 128.4, 121.9, 110.8, 55.212, 46.5, 43.1, 32.7. **HRMS (ESI) [M+H]<sup>+</sup>**: Calculated for [C<sub>26</sub>H<sub>21</sub>ClNO<sub>2</sub>]<sup>+</sup>:  
414.1255; found: 414.1260. HPLC (Chiralpak IB®, 1mLmin<sup>-1</sup>, Hexane:IPA 90:10, 254 nm<sup>-1</sup>): t<sub>r</sub>= 16.9, 26.1 min. IR (ν<sub>max</sub>, cm<sup>-1</sup>): 535, 554, 586, 603, 629, 668, 698, 717, 737, 759, 854, 916, 1072,  
1124, 1158, 1178, 1213, 1247, 1263, 1337, 1373, 1397, 1451, 1485, 1615, 1647, 1673, 1715, 2851, 2921,  
3351. [α]<sub>D</sub><sup>25</sup> = -106.3 (c=0.52, CHCl<sub>3</sub>).

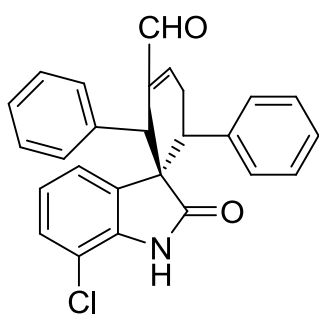

**3j:** Colorless oil.  $^1\text{H-NMR}$  (300 MHz,  $\text{CDCl}_3$ ,  $\text{TMS}_{\text{int}}$ ):  $\delta(\text{ppm})$ = 9.53 (s, 1H), 8.12-8.06 (m, 1H), 7.50-7.42 (m, 1H), 7.39-7.34 (m, 2H), 7.31-7.24 (m, 1H), 7.03-6.93 (m, 7H), 6.88 (d,  $J=8.1\text{Hz}$ , 1H), 6.41 (t,  $J=7.8\text{Hz}$ , 1H), 5.32 (d,  $J=7.8\text{Hz}$ , 1H), 4.02 (s, 1H), 3.63-3.57 (m, 1H), 3.57-3.43 (m, 1H), 2.95 (dt,  $J_1=19.3\text{Hz}$ ,  $J_2=4.6\text{Hz}$ , 1H).  $^{13}\text{C-NMR}$  (75 MHz,  $\text{CDCl}_3$ ):  $\delta(\text{ppm})$ = 192.3, 178.7, 150.8, 139.3, 139.1, 138.4, 133.4, 130.4, 130.1, 128.4, 128.2, 128.1, 127.9, 127.9, 127.6, 127.5, 127.1, 125.0, 121.5, 113.9, 55.3, 41.9, 45.2, 31.3. **HRMS (ESI)  $[\text{M}+\text{H}]^+$ :** Calculated for  $[\text{C}_{26}\text{H}_{19}\text{ClNO}]^+$ : 396.1150; found: 396.1147. **HPLC** (Chiralpak IB $\odot$ ,  $1\text{mLmin}^{-1}$ , Hexane:IPA 90:10,  $254\text{nm}^{-1}$ ):  $t_{\text{R}}$ = 11.1, 21.2 min. **IR ( $\nu_{\text{max}}$ ,  $\text{cm}^{-1}$ ):** 570, 595, 628, 661, 698, 733, 758, 782, 877, 915, 1024, 1080, 1138, 1157, 1172, 1221, 1264, 1318, 1339, 1372, 1409, 1474, 1584, 1617, 1651, 1683, 1702, 2341, 2359, 3029.  $[\alpha]_{\text{D}}^{25} = -79.3$  ( $c=1.3$ ,  $\text{CHCl}_3$ ).

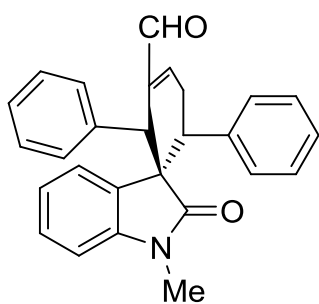

**3k:** Colorless oil.  $^1\text{H-NMR}$  (300 MHz,  $\text{CDCl}_3$ ,  $\text{TMS}_{\text{int}}$ ):  $\delta(\text{ppm})$ = 9.54 (s, 1H), 7.42-7.35 (m, 3H), 7.31-7.25 (m, 2H), 6.99-6.92 (m, 5H), 6.89-6.83 (m, 2H), 6.51-6.42 (m, 2H), 5.42 (d,  $J=7.5\text{Hz}$ , 1H), 3.93 (s, 1H), 3.64-3.57 (m, 1H), 3.57-3.44 (m, 1H), 3.06 (s, 3H), 2.93 (td,  $J_1=19.1\text{Hz}$ ,  $J_2=4.5\text{Hz}$ , 1H).  $^{13}\text{C-NMR}$  (75 MHz,  $\text{CDCl}_3$ ):  $\delta(\text{ppm})$ = 192.5, 177.4, 151.0, 142.8, 139.8, 139.3, 139.1, 133.5, 128.3, 127.7, 127.6, 127.5, 127.4, 126.7, 126.3, 120.7, 107.1, 53.6, 44.9, 42.2, 31.3, 25.8. **HRMS (ESI)  $[\text{M}+\text{H}]^+$ :** Calculated for  $[\text{C}_{27}\text{H}_{24}\text{NO}_2]^+$ : 394.1802; found: 394.1806. **HPLC** (Chiralpak IB $\odot$ ,  $1\text{mLmin}^{-1}$ , Hexane:IPA 90:10,  $254\text{nm}^{-1}$ ):  $t_{\text{R}}$ = 10.4 i 24.1 min. **IR ( $\nu_{\text{max}}$ ,  $\text{cm}^{-1}$ ):** 528, 574, 604, 624, 675, 699, 735, 753, 806, 915, 931, 976, 1000, 1091, 1130, 1156, 1301, 1350, 1375, 1409, 1452, 1609, 1652, 1682, 2920, 3028, 3056.  $[\alpha]_{\text{D}}^{25} = -63.8$  ( $c=1.2$ ,  $\text{CHCl}_3$ ).

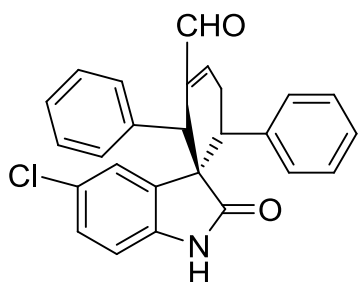

**3l:** Colorless oil.  $^1\text{H-NMR}$  (300 MHz,  $\text{CDCl}_3$ ,  $\text{TMS}_{\text{int}}$ ):  $\delta(\text{ppm})$ = 9.54 (s, 1H), 7.96 (s, 1H), 7.48-7.49 (m, 5H), 7.05-6.93 (m, 6H), 6.87 (dd,  $J_1=8.4\text{Hz}$ ,  $J_2=2.2\text{Hz}$ , 1H), 6.64 (bs, 1H), 6.45 (d,  $J=8.4\text{Hz}$ , 1H), 5.28 (d,  $J=2.2\text{Hz}$ , 1H), 3.99 (s, 1H), 3.59-3.41 (m, 2H), 3.03-2.87 (m, 1H).  $^{13}\text{C-NMR}$  (75 MHz,  $\text{CDCl}_3$ ):  $\delta(\text{ppm})$ = 192.4, 179.5, 150.9, 139.3, 139.1, 138.3, 133.4, 130.9, 128.3, 128.1, 127.9, 127.4, 127.1, 126.1, 109.7, 54.5, 45.1, 41.7, 31.3. **HRMS (ESI)  $[\text{M}+\text{H}]^+$ :** Calculated for  $[\text{C}_{26}\text{H}_{21}\text{ClNO}_2]^+$ : 414.1255; found: 414.1259. **HPLC** (Chiralpak IB $\odot$ ,  $1\text{mLmin}^{-1}$ , Hexane:IPA 90:10,  $254\text{nm}^{-1}$ ):  $t_{\text{R}}$ = 15.1, 26.9 min. **IR ( $\nu_{\text{max}}$ ,  $\text{cm}^{-1}$ ):** 528, 555, 574, 622, 646, 700, 734, 760, 775, 916, 929, 1001, 1030, 1079, 1121, 1156, 1177, 1216, 1233, 1264, 1336, 1372, 1408, 1452, 1620, 1650, 1685, 2851, 2922, 3028, 3255.  $[\alpha]_{\text{D}}^{25} = -87.8$  ( $c=0.45$ ,  $\text{CHCl}_3$ ).



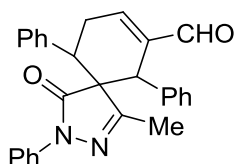

**4a:** White solid.  $^1\text{H NMR}$  (400 MHz,  $\text{CDCl}_3$ ):  $\delta$  = 9.51 (s, 1H), 7.80-7.66 (m, 2H), 7.42-7.30 (m, 8H), 7.23-7.09 (m, 6H), 4.20 (s, 1H), 3.57 (dd,  $J_1=5.6$  Hz,  $J_2=11.5$  Hz, 1H), 3.45-3.35 (m, 1H), 2.96-2.87 (m, 1H), 0.95 (s, 3H).  $^{13}\text{C NMR}$  (100 MHz,  $\text{CDCl}_3$ ):  $\delta$  = 191.1, 150.3, 139.3, 138.5, 131.7, 131.6, 129.3, 128.9, 128.8, 128.5, 128.2, 127.9, 127.6, 125.3, 45.3, 39.6, 31.5, 15.6. **HRMS (ESI):** calcd. for  $[\text{M}+\text{H}]^+$  ( $\text{C}_{28}\text{H}_{25}\text{N}_2\text{O}_2$ ) requires 421.1911, found 421.1912. **HPLC** (Chiralpak IB, *n*-hexane: *i*-PrOH = 95:5,  $\lambda=254$  nm, 1.0 mL/min):  $t_R$  = 13.3, 27.0 min. **IR** ( $\nu_{\text{max}}$ ,  $\text{cm}^{-1}$ ): 703, 758, 1123, 1159, 1288, 1365, 1391, 1454, 1498, 1595, 1651, 1687.  $[\alpha]_D^{25} = +69.8$  ( $c=0.7$ ,  $\text{CHCl}_3$ , e.r. 99.9:0.1, (*R*)-Cat.).

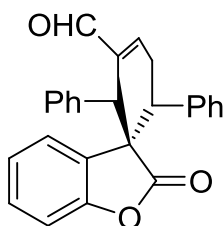

**5a:** Colorless oil.  $^1\text{H-NMR}$  (400 MHz,  $\text{CDCl}_3$ ,  $\text{TMS}_{\text{int}}$ ):  $\delta(\text{ppm})=$  9.55 (s, 1H), 7.50-6.90 (m, 10H), 6.75 (d,  $J=7.7$  Hz, 1H), 6.58 (t,  $J=7.7$  Hz, 1H), 5.43 (d,  $J=7.7$  Hz, 1H), 4.09 (s, 1H), 3.63 (dd,  $J=10.2$ , 6.4 Hz, 1H), 3.44 (dd,  $J=20.2$ , 10.2 Hz, 1H), 3.01 (m, 1H).  $^{13}\text{C-NMR}$  (100 MHz,  $\text{CDCl}_3$ ):  $\delta(\text{ppm})=$  193.2, 178.1, 153.5, 151.7, 140.4, 139.8, 138.7, 129.7, 129.5, 129.3, 129.2, 129.1, 128.5, 127.8, 123.6, 111.0, 54.5, 47.0, 43.5, 32.4. **HPLC (ESI):** Chiralcel IB, hexane-IPA 90:10, 1 mL/min,  $t_R$ : 10.0, 20.0 min. **HRMS (ESI):** calcd. for  $[\text{M}+\text{H}]^+$  ( $\text{C}_{26}\text{H}_{21}\text{O}_3$ ) requires 381.1485, found 381.1487.  $[\alpha]_D^{25} = +56.2$  ( $c=0.38$ ,  $\text{CHCl}_3$ , e.r. 96.5:3.5, (*R*)-Cat.).

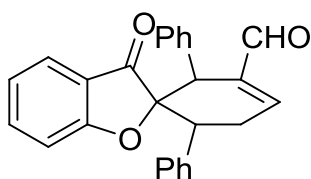

**6a:** Colorless oil.  $^1\text{H-NMR}$  (400 MHz,  $\text{CDCl}_3$ ,  $\text{TMS}_{\text{int}}$ ):  $\delta(\text{ppm})=$  9.56 (s, 1H), 7.50-6.90 (m, 10H), 6.90 (t,  $J=6.9$  Hz, 1H), 6.72 (d,  $J=8.0$  Hz, 1H), 4.16 (s, 1H), 3.65-3.45 (m, 2H), 3.05-2.95 (m, 1H).  $^{13}\text{C-NMR}$  (100 MHz,  $\text{CDCl}_3$ ):  $\delta(\text{ppm})=$  203.0, 192.9, 171.9, 152.0, 140.2, 138.9, 138.4, 137.8, 131.0, 130.0, 129.2, 128.9, 128.6, 128.5, 125.2, 122.7, 114.2, 113.8, 44.7, 43.0, 32.0. **HPLC:** Chiralcel IB, hexane-IPA 90:10, 1 mL/min,  $t_R$ : 10.1, 21.1 min. **HRMS (ESI):** calcd. for  $[\text{M}+\text{H}]^+$  ( $\text{C}_{26}\text{H}_{21}\text{O}_3$ ) requires 381.1485, found 381.1493. **IR** ( $\nu_{\text{max}}$ ,  $\text{cm}^{-1}$ ): 647, 713, 754, 816, 1009, 1072, 1461, 1475, 1486, 1608, 1683, 1705, 2340, 2359, 2921.  $[\alpha]_D^{25} = +56.9$  ( $c=0.75$ ,  $\text{CHCl}_3$ , e.r. 99.5:0.5, (*R*)-Cat.).

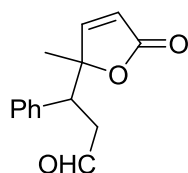

**7a:** Colorless oil. Mixture of diastereomers, d.r.=1.2:1.  $^1\text{H NMR}$  (300 MHz,  $\text{CDCl}_3$ ):  $\delta$  = 9.63 (t,  $J=1.4$  Hz, 1H), 9.58 (t,  $J=1.2$  Hz, 1H), 7.35-7.27 (m, 10H), 7.18-7.14 (m, 2H), 6.06 (d,  $J=5.6$  Hz, 1H), 5.91 (d,  $J=5.7$  Hz, 1H), 3.73 (dd,  $J_1=5.7$  Hz,  $J_2=8.5$  Hz, 1H), 3.55 (dd,  $J_1=5.7$  Hz,  $J_2=7.9$  Hz, 1H), 2.94-2.83 (m, 4H), 1.45 (s, 3H), 1.30 (m, 3H).  $^{13}\text{C NMR}$  (100 MHz,  $\text{CDCl}_3$ ):  $\delta$  = 199.7, 199.6, 172.2, 171.8, 160.7, 158.6, 138.2, 138.0, 129.3, 128.9, 128.7, 128.6, 127.9, 127.8, 121.4, 89.9, 89.7, 47.5, 45.8, 44.6, 44.0, 23.6, 22.1. **HRMS (ESI):** calcd. for  $[\text{M}+\text{H}]^+$  ( $\text{C}_{14}\text{H}_{15}\text{O}_3$ ) requires 231.1016, found 231.1018.

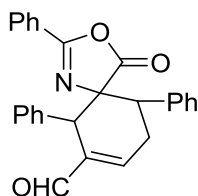

**8a** (major diastereomer): Colorless oil.  $^1\text{H NMR}$  (300 MHz,  $\text{CDCl}_3$ ):  $\delta$  = 9.55 (s, 1H), 7.94-7.89 (m, 2H), 7.61-7.30 (m, 9H), 7.22-7.09 (m, 5H), 4.00 (s, 1H), 3.64 (dd,  $J_1=5.9$  Hz,  $J_2=11.2$  Hz, 1H), 3.26-3.13 (m, 1H), 3.04-2.93 (m, 1H).  $^{13}\text{C NMR}$  (100 MHz,  $\text{CDCl}_3$ ):  $\delta$  = 191.9, 175.0, 161.1, 149.3, 139.8, 137.3, 135.6, 132.8, 130.7, 130.2, 130.0, 129.1, 129.0, 128.7, 128.5, 128.4, 128.3, 128.1, 128.0, 127.9, 74.6, 47.9, 41.4, 31.4. **HPLC** (Chiralpak IB, *n*-hexane: *i*-PrOH = 90:10,  $\lambda=254$  nm, 1.0 mL/min):  $t_R$  = 9.5, 17.1 min. **HRMS (ESI)**: calcd. for  $[\text{M}+\text{H}]^+$  ( $\text{C}_{27}\text{H}_{22}\text{NO}_3$ ) requires 408.1594, found 408.1594. **IR** ( $\nu_{\text{max}}$ ,  $\text{cm}^{-1}$ ): 700, 732, 761, 781, 864, 882, 914, 944, 968, 1095, 1154, 1179, 1291, 1321, 1451, 1493, 1601, 1650, 1686, 1816, 2924.  $[\alpha]_D^{25} = -43.6$  ( $c=1.0$ ,  $\text{CHCl}_3$ , e.r. 99.7:0.3, (*S*)-Cat.).

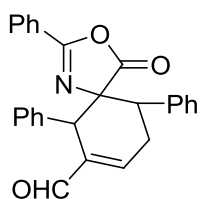

**8a** (minor diastereomer): Colorless oil.  $^1\text{H NMR}$  (400 MHz,  $\text{CDCl}_3$ ):  $\delta$  = 9.58 (s, 1H), 8.14-8.11 (m, 2H), 7.66-7.59 (m, 2H), 7.51-7.29 (m, 7H), 7.17-7.05 (m, 5H), 4.20 (s, 1H), 3.65 (dd,  $J_1=6.1$  Hz,  $J_2=11.0$  Hz, 1H), 3.43-3.33 (m, 1H), 3.08-2.99 (m, 1H).  $^{13}\text{C NMR}$  (100 MHz,  $\text{CDCl}_3$ ):  $\delta$  = 191.7, 178.0, 171.8, 159.1, 150.6, 138.9, 137.4, 136.8, 133.8, 132.5, 130.2, 128.5, 128.4, 128.3, 128.0, 127.7, 127.7, 127.6, 73.0, 45.8, 41.9, 30.2. **HPLC** (Chiralpak IB, *n*-hexane: *i*-PrOH = 90:10,  $\lambda=254$  nm, 1.0 mL/min):  $t_R$  = 9.8, 20.0 min. **HRMS (ESI)**: calcd. for  $[\text{M}+\text{H}]^+$  ( $\text{C}_{27}\text{H}_{22}\text{NO}_3$ ) requires 408.1594, found 408.1595. **IR** ( $\nu_{\text{max}}$ ,  $\text{cm}^{-1}$ ): 663, 700, 762, 777, 883, 934, 987, 1113, 1154, 1174, 1287, 1319, 1414, 1451, 1494, 1582, 1602, 1653, 1804, 2923.  $[\alpha]_D^{25} = -117.1$  ( $c=0.9$ ,  $\text{CHCl}_3$ , e.r. >99.9:0.1, (*S*)-Cat.).

**Figure 1**

DC of compound **3a**  
calculated

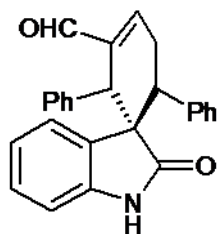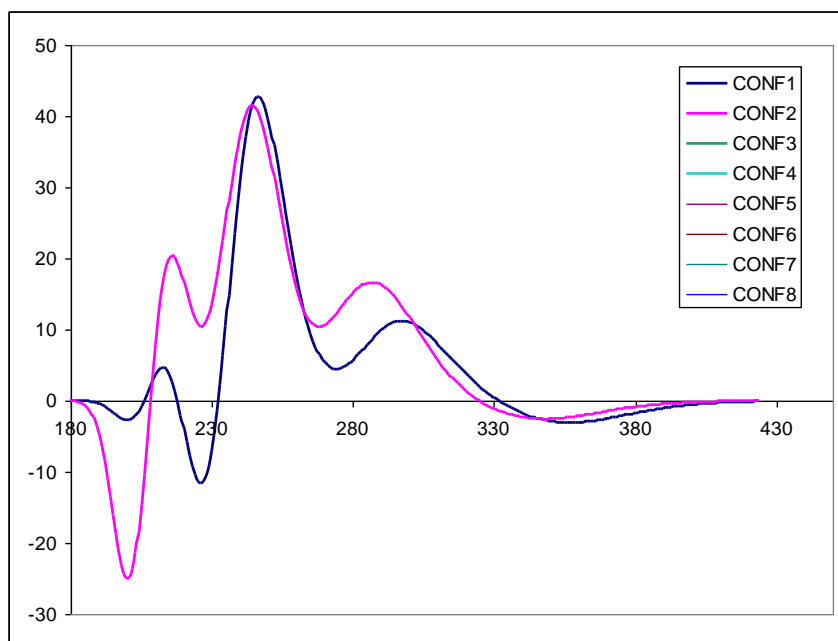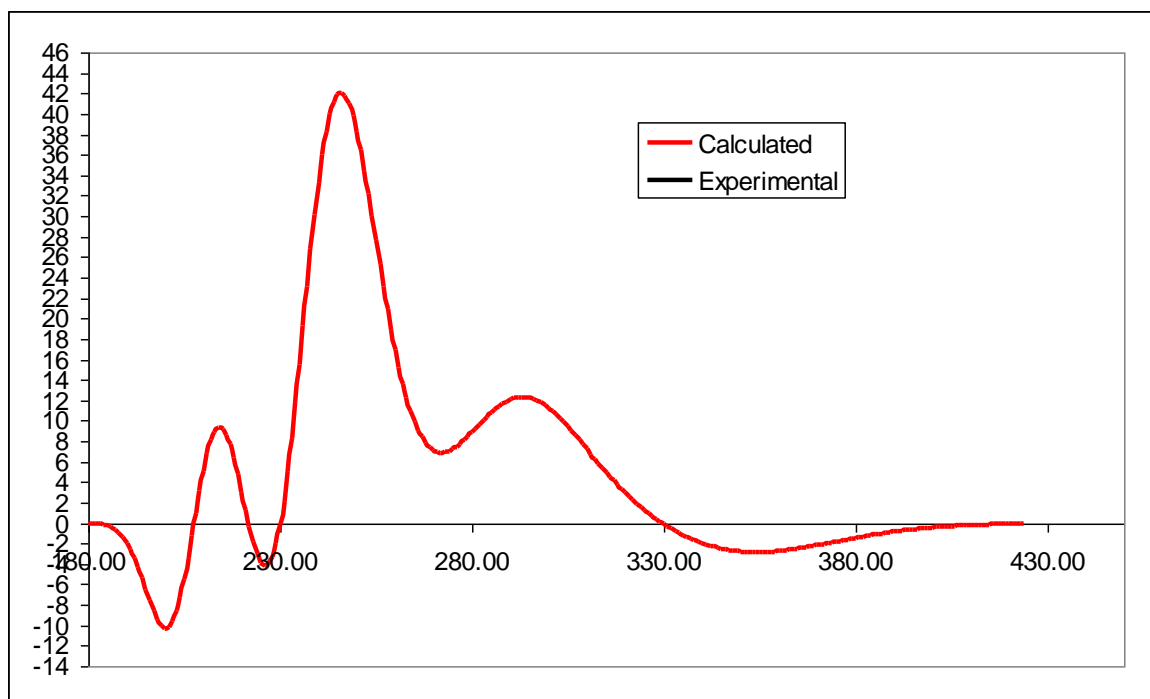

Experimental DC for the product **3a** obtained with (*R*)-catalyst

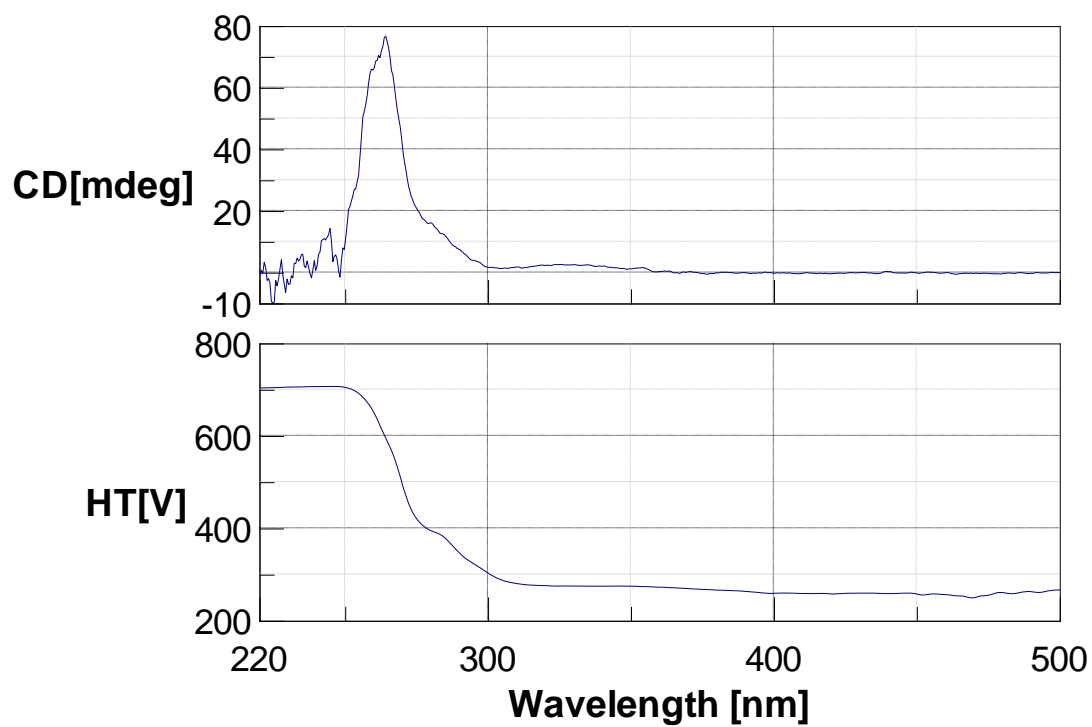

### Absolute configuration of compound **4a** (pyrazole)

In the present case, theoretical calculation of ECD spectra and the assignment of the absolute configuration was carried out by means of the TD-DFT method, since this technique has been successfully employed several times to predict ECD spectra and to assign the AC of organic molecules<sup>i</sup> Starting from the relative configuration obtained by NMR analysis, a conformational search has been carried out using Monte Carlo searching together with the MMFF94 molecular mechanics force field (as implemented in Titan 1.0.5). All conformations within a 5 kcal/mol window were then optimized using DFT at the B3LYP/6-31G(d) level<sup>ii</sup>, and the harmonic vibrational frequencies of each conformation were calculated at the same level to confirm their stability (no imaginary frequencies observed), and to evaluate the free energy of each conformation by ZPE correction. After DFT minimization, the MMFF structures clustered in two conformations (**a** and **b**), that are different because of the different disposition of the CHO group (see Figure S1 and Table S1). This means that the molecule is quite rigid, and this feature greatly enhance the reliability of the method, being the correct determination of the energy of each conformation its main weakness.

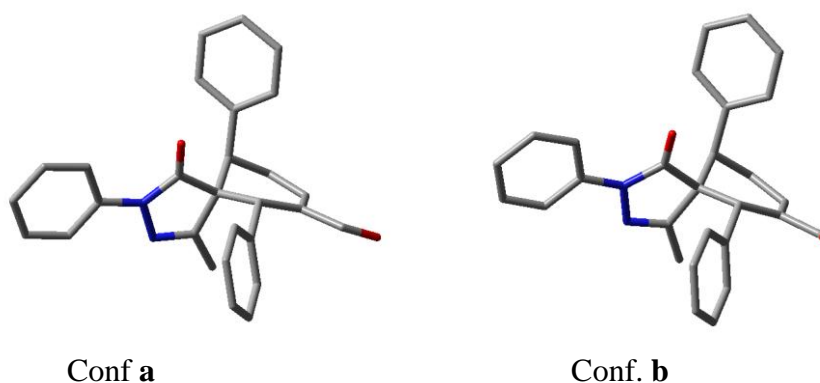

Figure S1: 3D view of the two most stable conformations of compound **4a** (energies in kcal/mol)

**Table S1:** Calculated relative energies (E) and free energies (G) of the conformations of **4a** (in kcal/mol, B3LYP/6-31G(d) level). Populations percentages (P) are calculated assuming Boltzmann statistics at T=25°C.

| Molecule  | Conf     | E    | G    | Pop ( $\Delta G$ ) |
|-----------|----------|------|------|--------------------|
| <b>4a</b> | <b>a</b> | 0.00 | 0.00 | 66                 |
|           | <b>b</b> | 0.37 | 0.40 | 34                 |

Calculation of the Electronic Circular Dichroism spectra of both the conformations were carried out using the TD-DFT - BH&HLYP/6-311+G(d,p)//B3LYP/6-31G(d) level<sup>iii</sup>, and assuming 5*S*, 6*S*, 10*R* absolute configuration<sup>iv</sup>. Rotational strength were calculated in both length and velocity representation. The resulting values are very similar, therefore the errors due to basis set incompleteness are very small.<sup>v</sup> Electronic excitation energies and rotational strengths have been calculated for the two conformations, and the ECD spectra were obtained by applying a 0.4 eV Gaussian shaped line width<sup>vi</sup>. In order to cover the 170-400 nm range, 70 transition were calculated for each conformation (Figure S2).

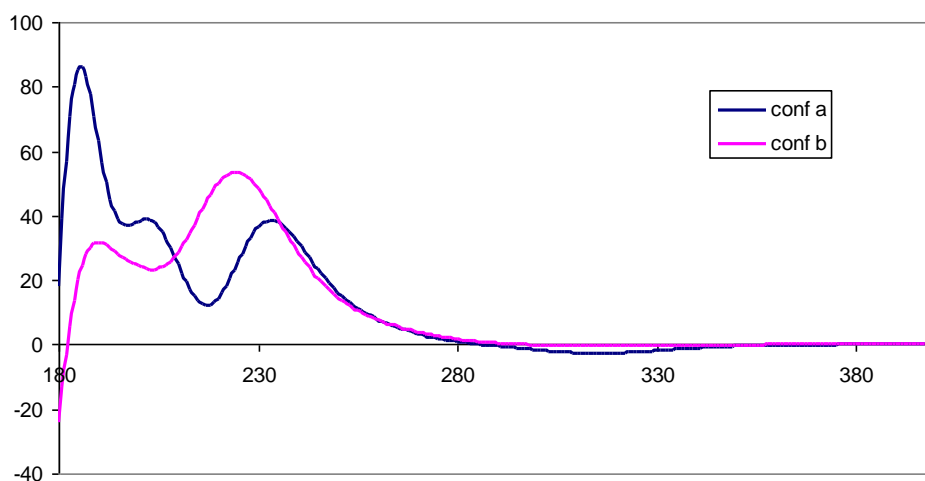

Figure S2. Calculated ECD spectra for the two conformations of **compound 4a**. vertical scale is in  $\Delta\epsilon$ , horizontal scale is in nm.

The trend of the two spectra are similar and in both spectra the cotton effects below 250 nm are positive, indicating that the resulting weighted ECD spectrum is not strongly influenced by the relative population of the conformations. The final simulated ECD spectra was obtained taking into account the 66:34 population ratios determined starting from the calculated free energies at the B3LYP/6-31G(d) level, and assuming Boltzmann statistics (Figure S2) The simulated spectrum is in good agreement with the experimental one, and the 5*S*, 6*S*, 10*R* configuration can be reliably assigned to compound **4a**.

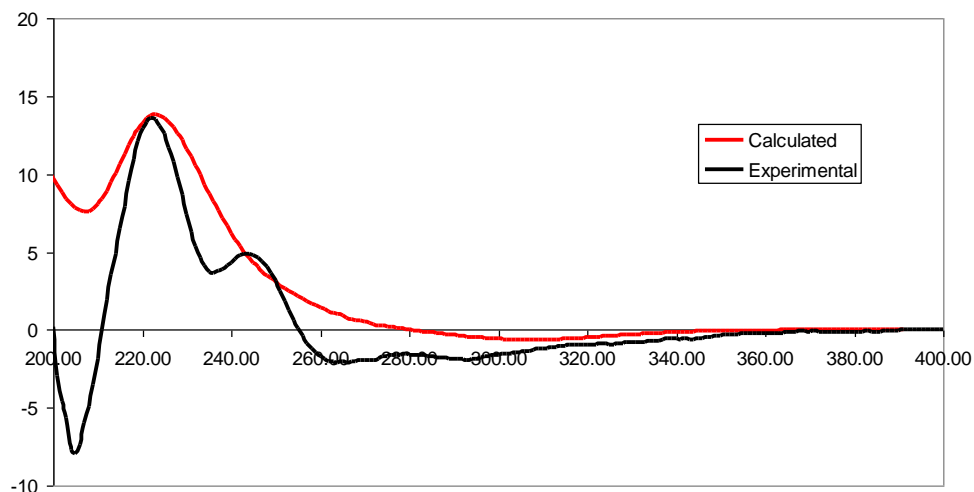

Figure S2: Experimental ECD spectrum (in black) and simulated spectrum (in red) assuming  $5S$ ,  $6S$ ,  $10R$  absolute configuration. The vertical scale is in mdeg, and the simulated spectrum has been scaled accordingly. The simulated spectrum has been blue-shifted by 8 nm in order to match the experimental trace.

Compound **3a** (gCOSY, NOESY,  
TOCSY)

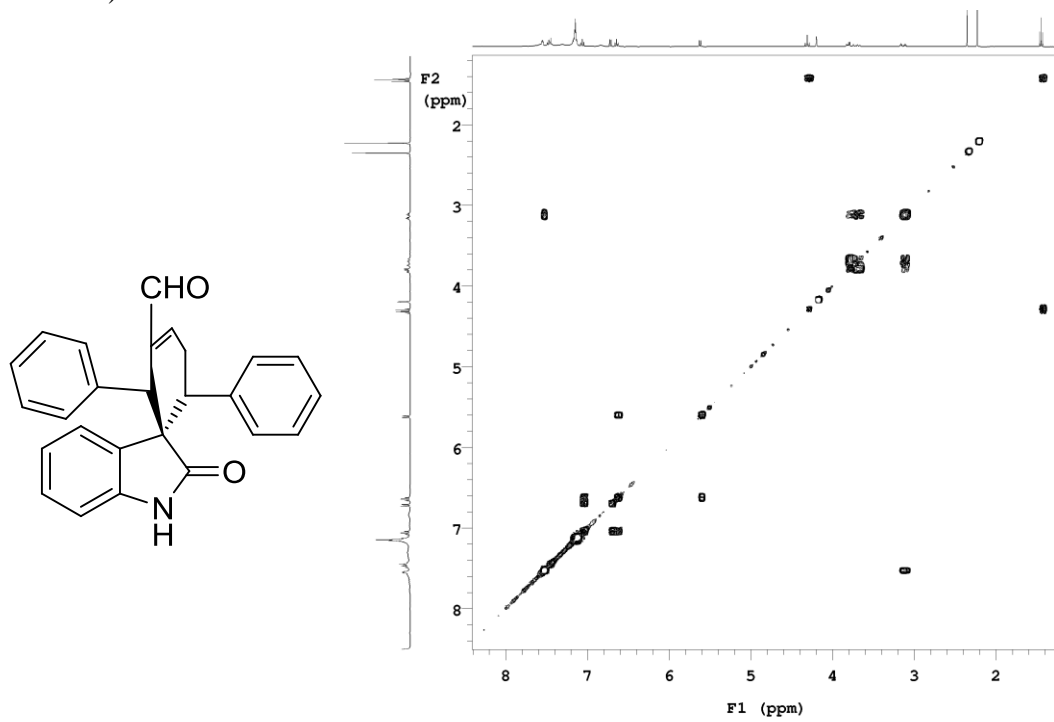



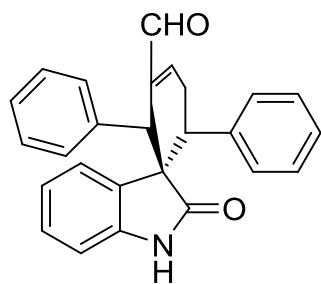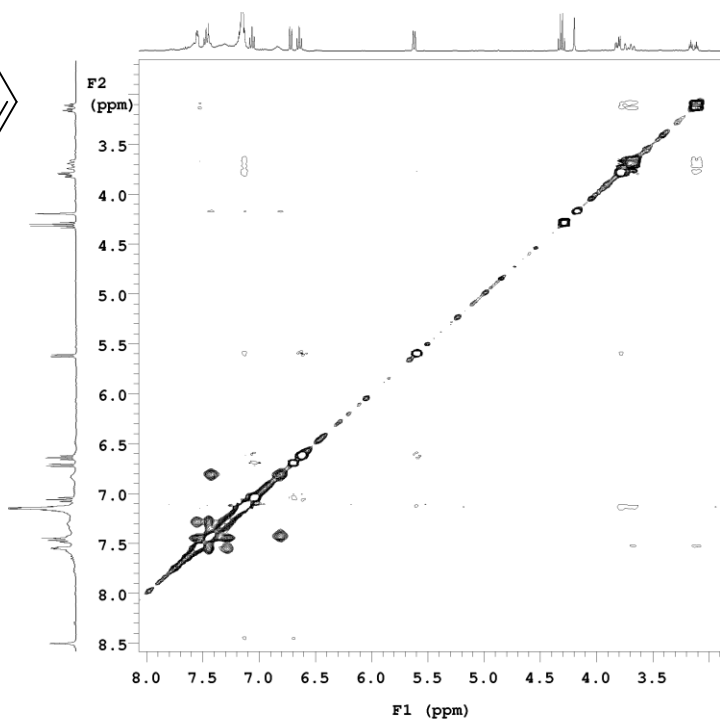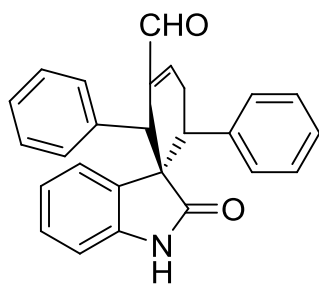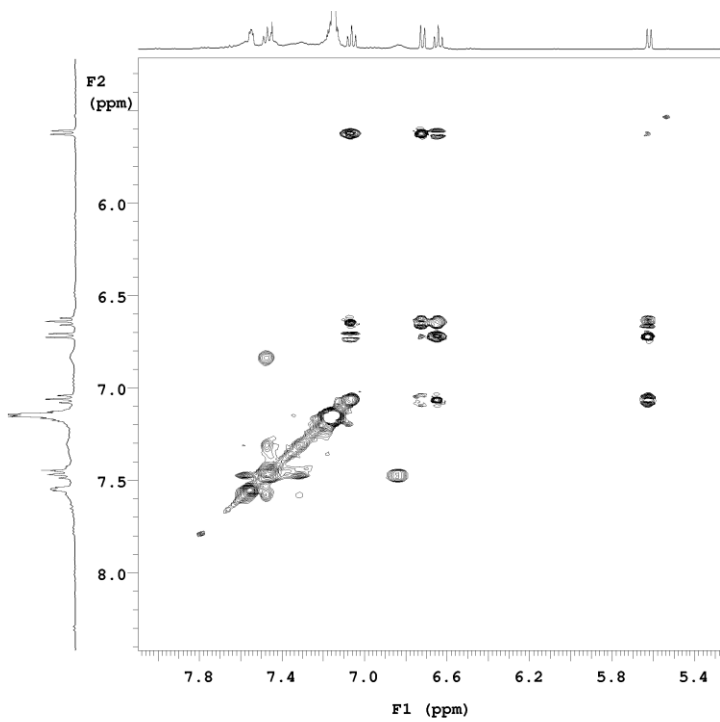

3a

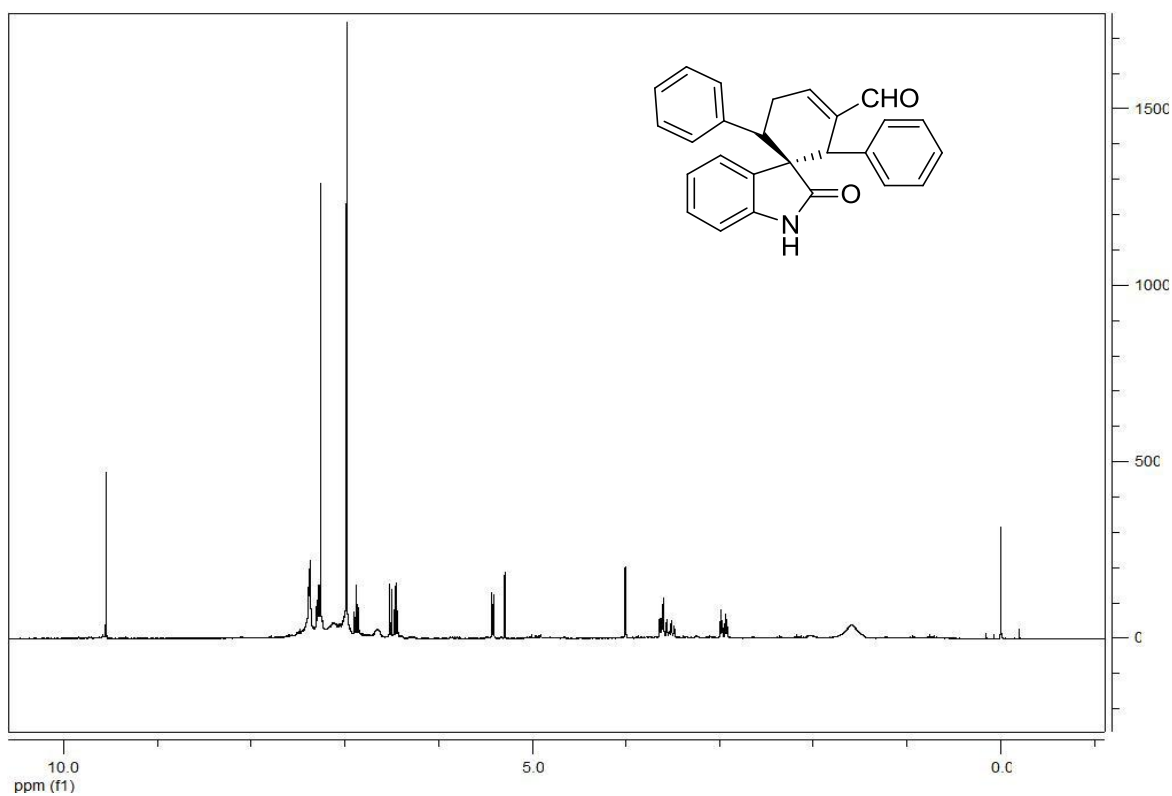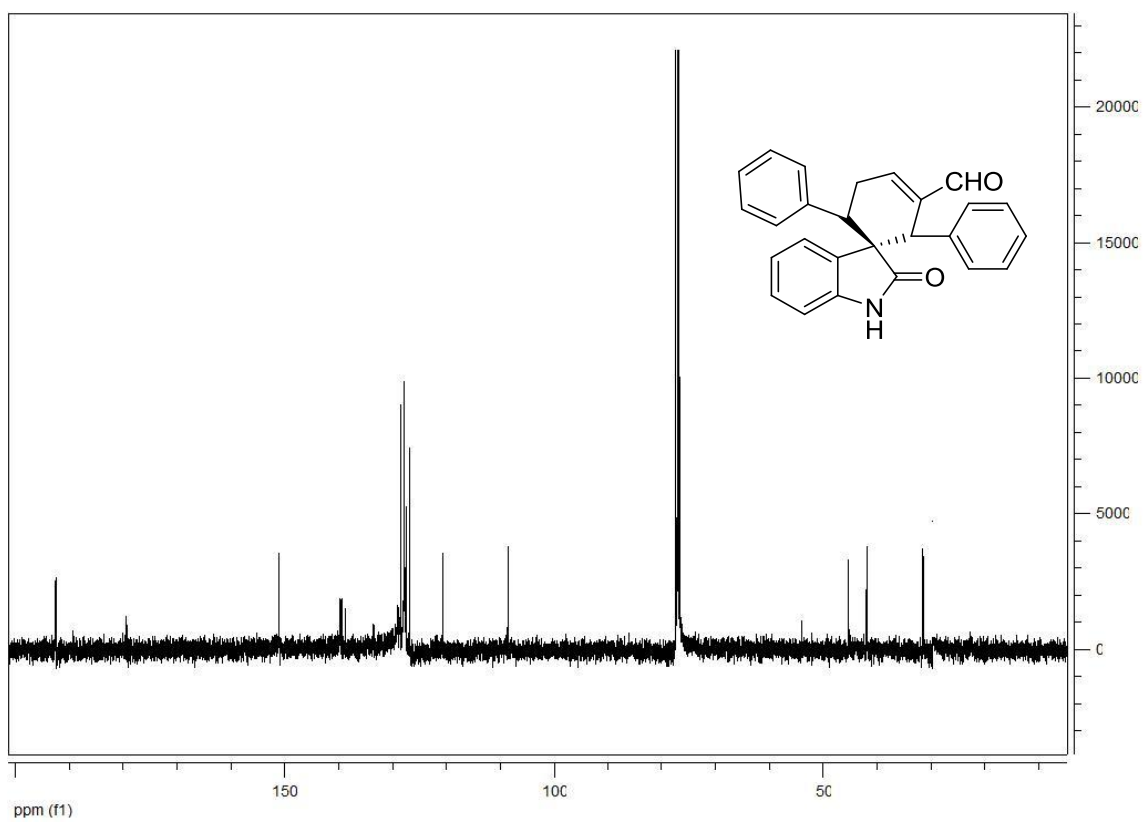

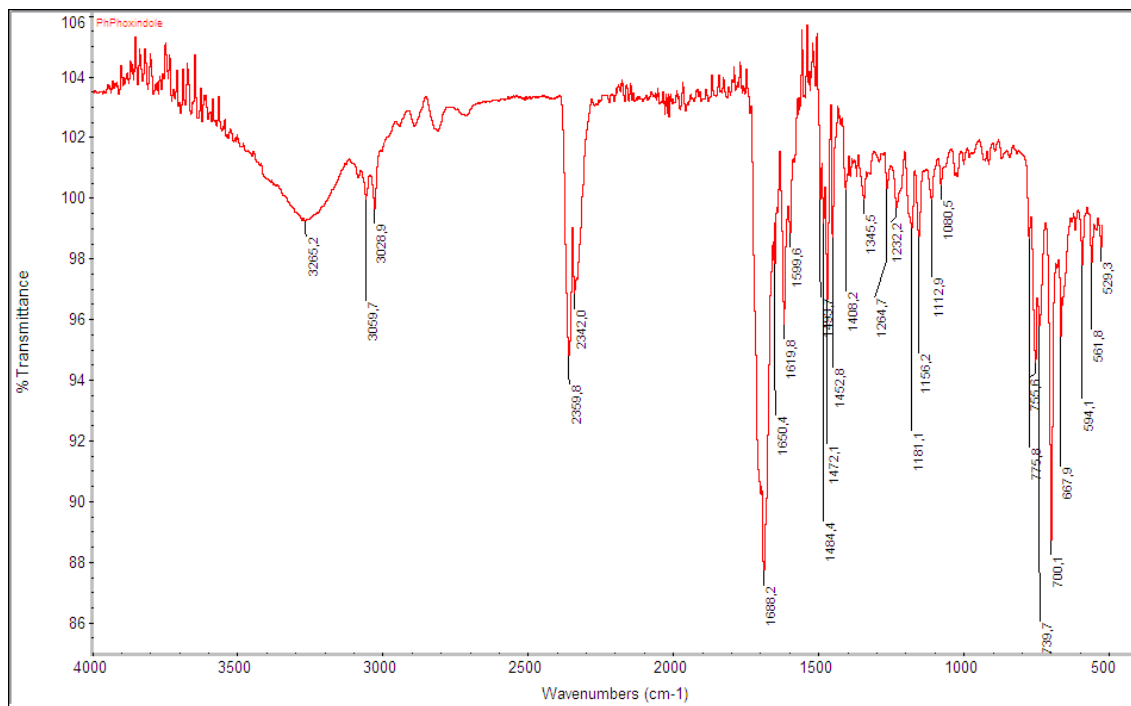

<Chromatogram>

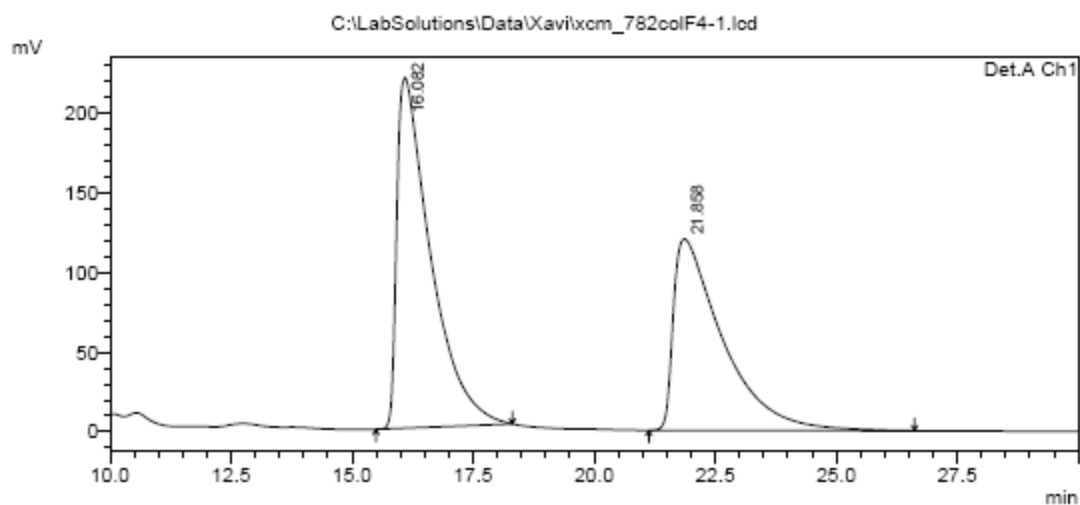

PeakTable

Detector A Ch1 254nm

| Peak# | Ret. Time | Area     | Height | Area % | Height % |
|-------|-----------|----------|--------|--------|----------|
| 1     | 16.082    | 10655755 | 219922 | 55.655 | 64.688   |
| 2     | 21.858    | 8490479  | 120050 | 44.345 | 35.312   |

<Chromatogram>

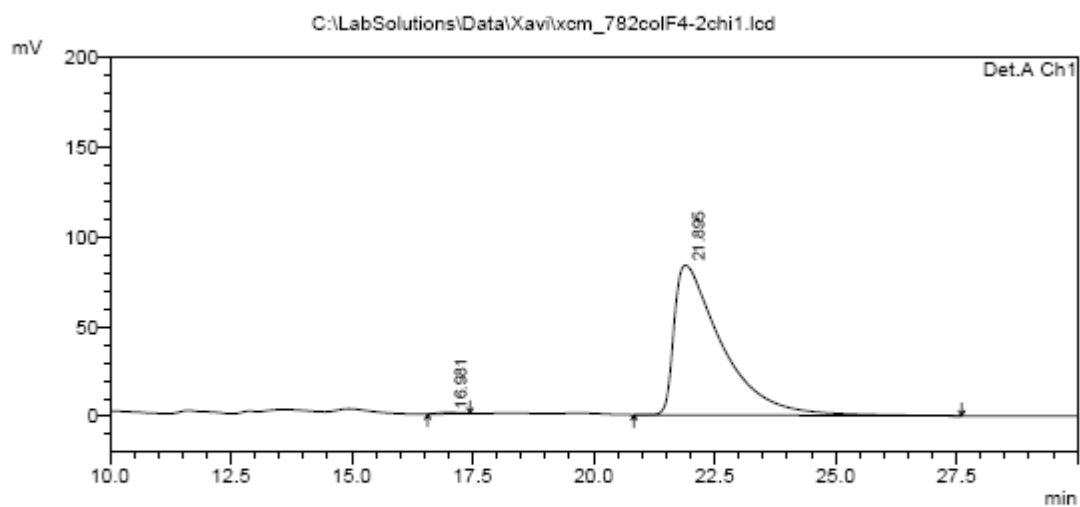

PeakTable

Detector A Ch1 254nm

| Peak# | Ret. Time | Area    | Height | Area %  | Height % |
|-------|-----------|---------|--------|---------|----------|
| 1     | 16.981    | 20362   | 700    | 0.355   | 0.831    |
| 2     | 21.895    | 5720342 | 83483  | 99.645  | 99.169   |
| Total |           | 5740703 | 84183  | 100.000 | 100.000  |

3d

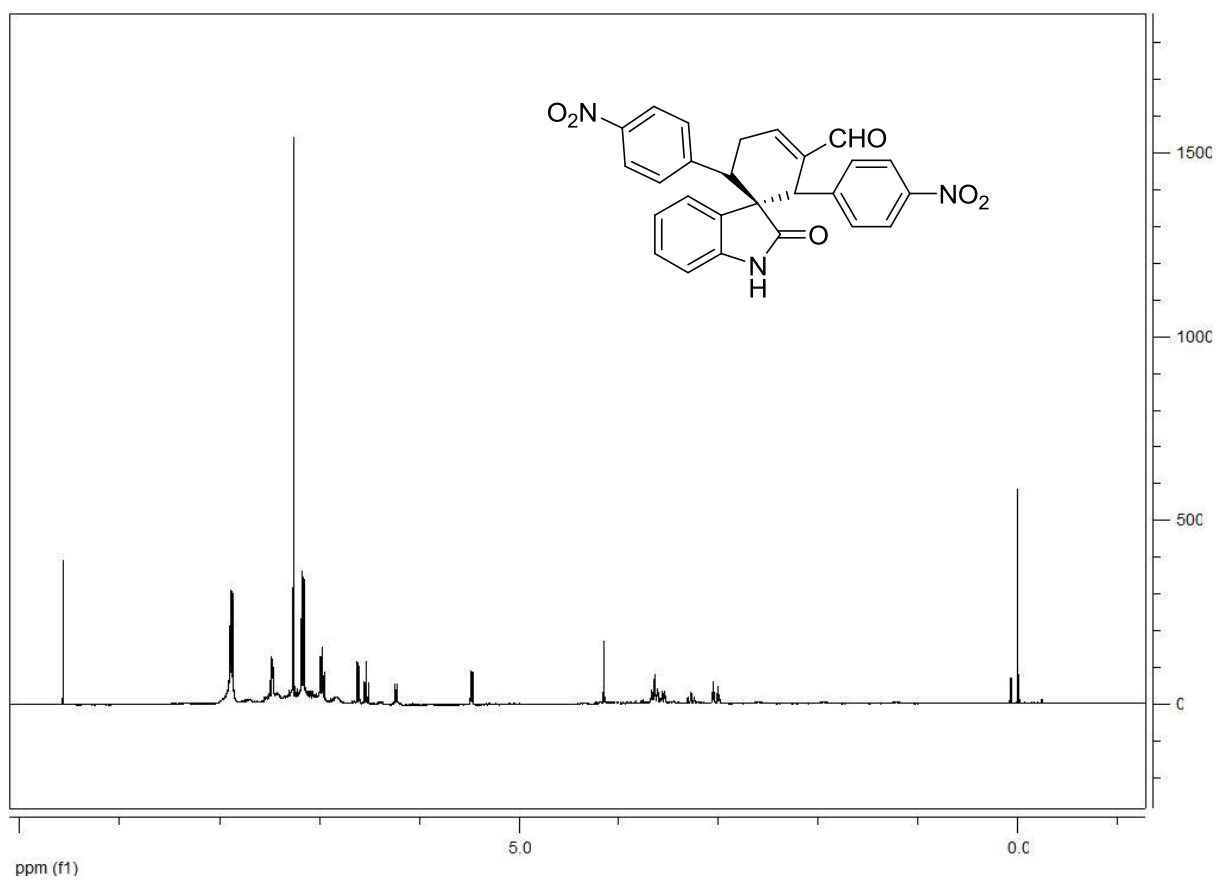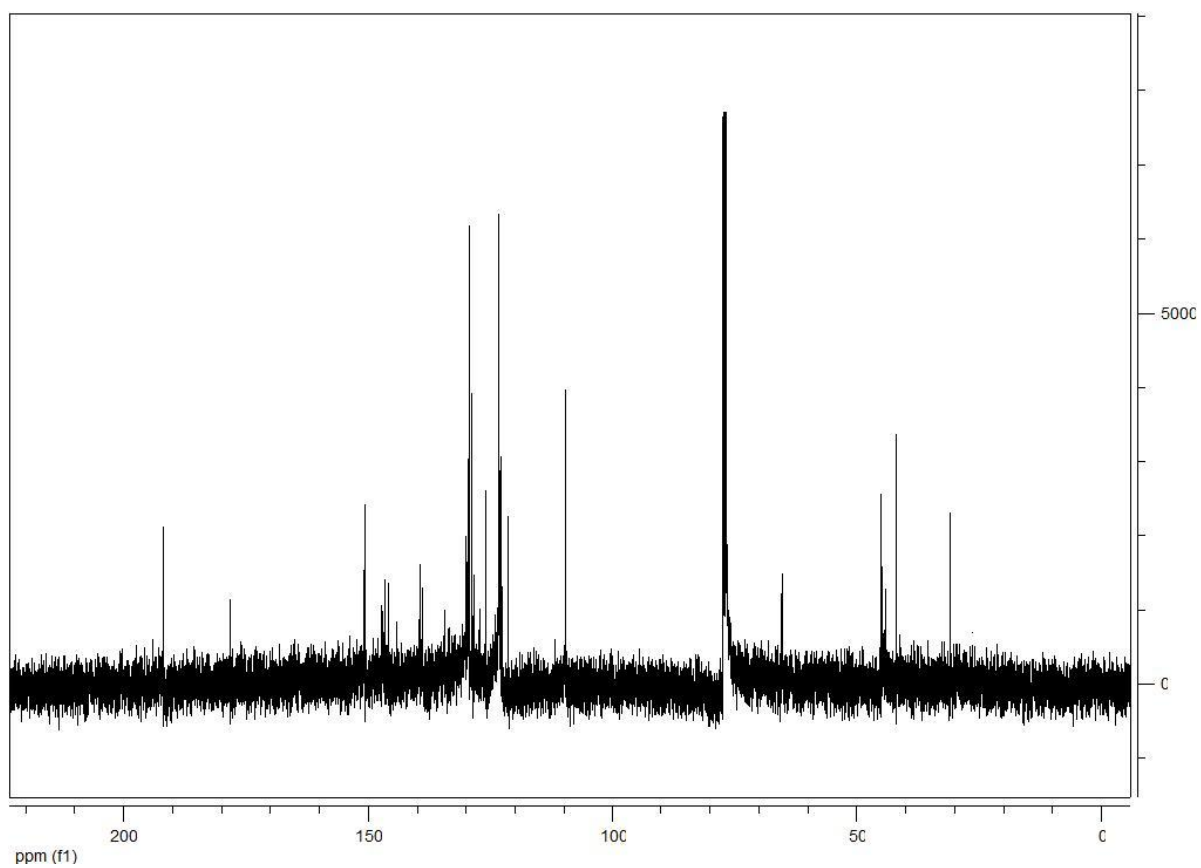

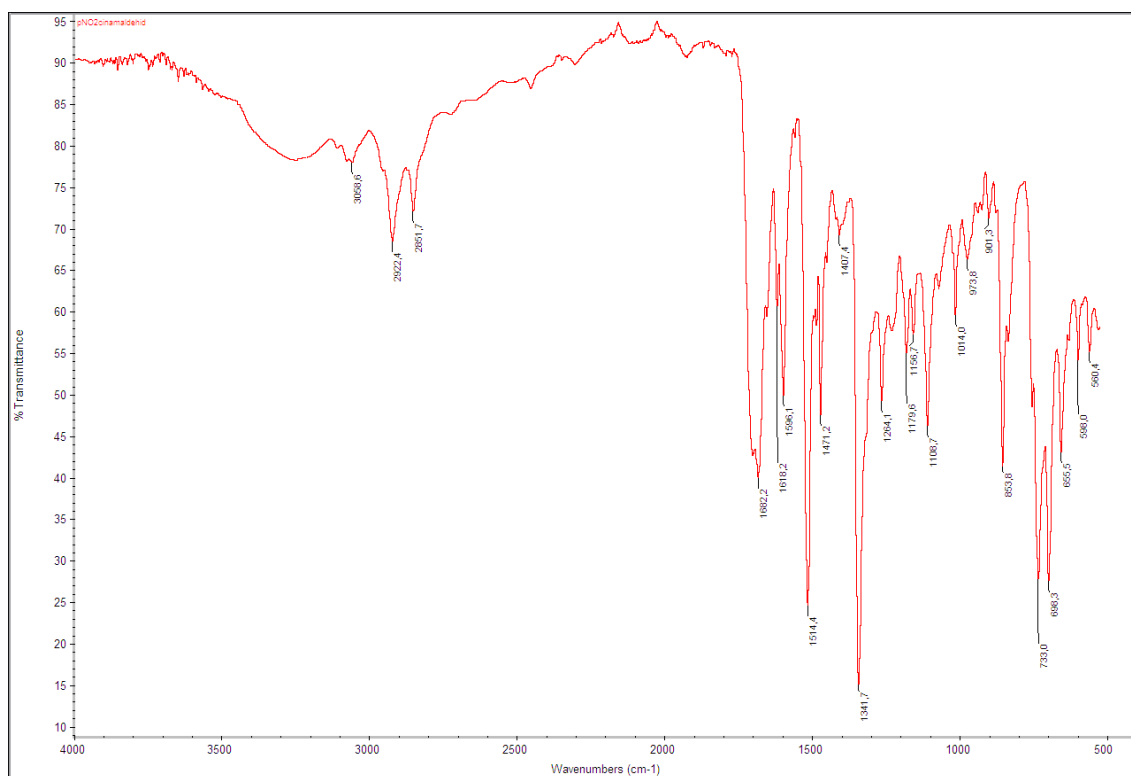

<Chromatogram>

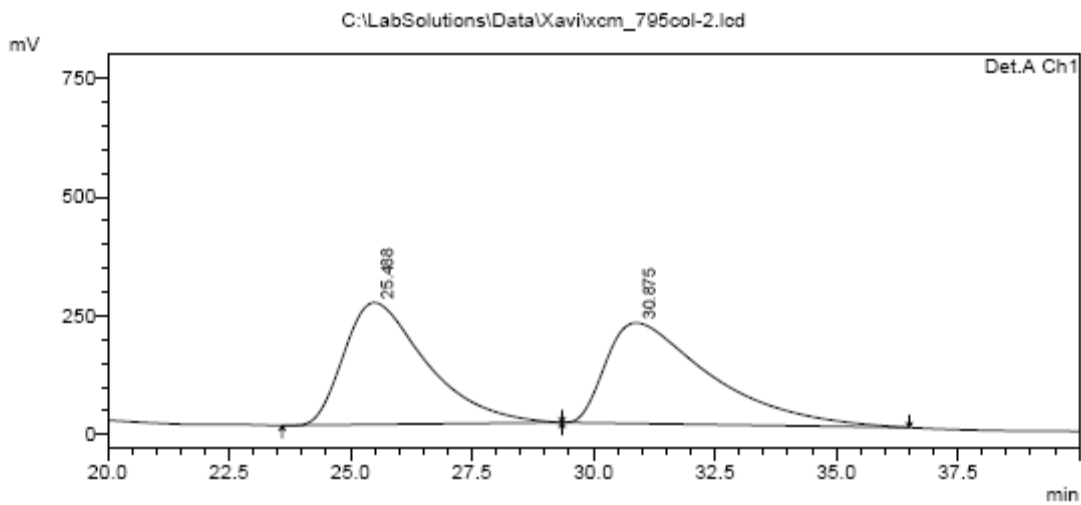

PeakTable

| Peak# | Ret. Time | Area     | Height | Area %  | Height % |
|-------|-----------|----------|--------|---------|----------|
| 1     | 25.488    | 30305892 | 256715 | 48.918  | 54.768   |
| 2     | 30.875    | 31646482 | 212020 | 51.082  | 45.232   |
| Total |           | 61952374 | 468735 | 100.000 | 100.000  |

<Chromatogram>

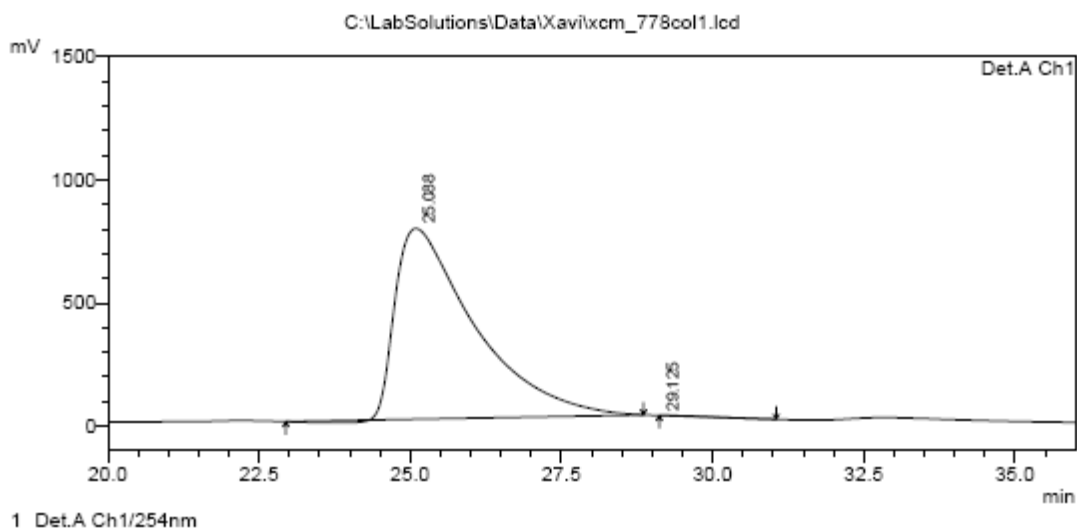

PeakTable

| Peak# | Ret. Time | Area     | Height | Area %  | Height % |
|-------|-----------|----------|--------|---------|----------|
| 1     | 25.088    | 70357387 | 774205 | 99.913  | 99.997   |
| 2     | 29.125    | 61548    | 26     | 0.087   | 0.003    |
| Total |           | 70418935 | 774231 | 100.000 | 100.000  |

3c

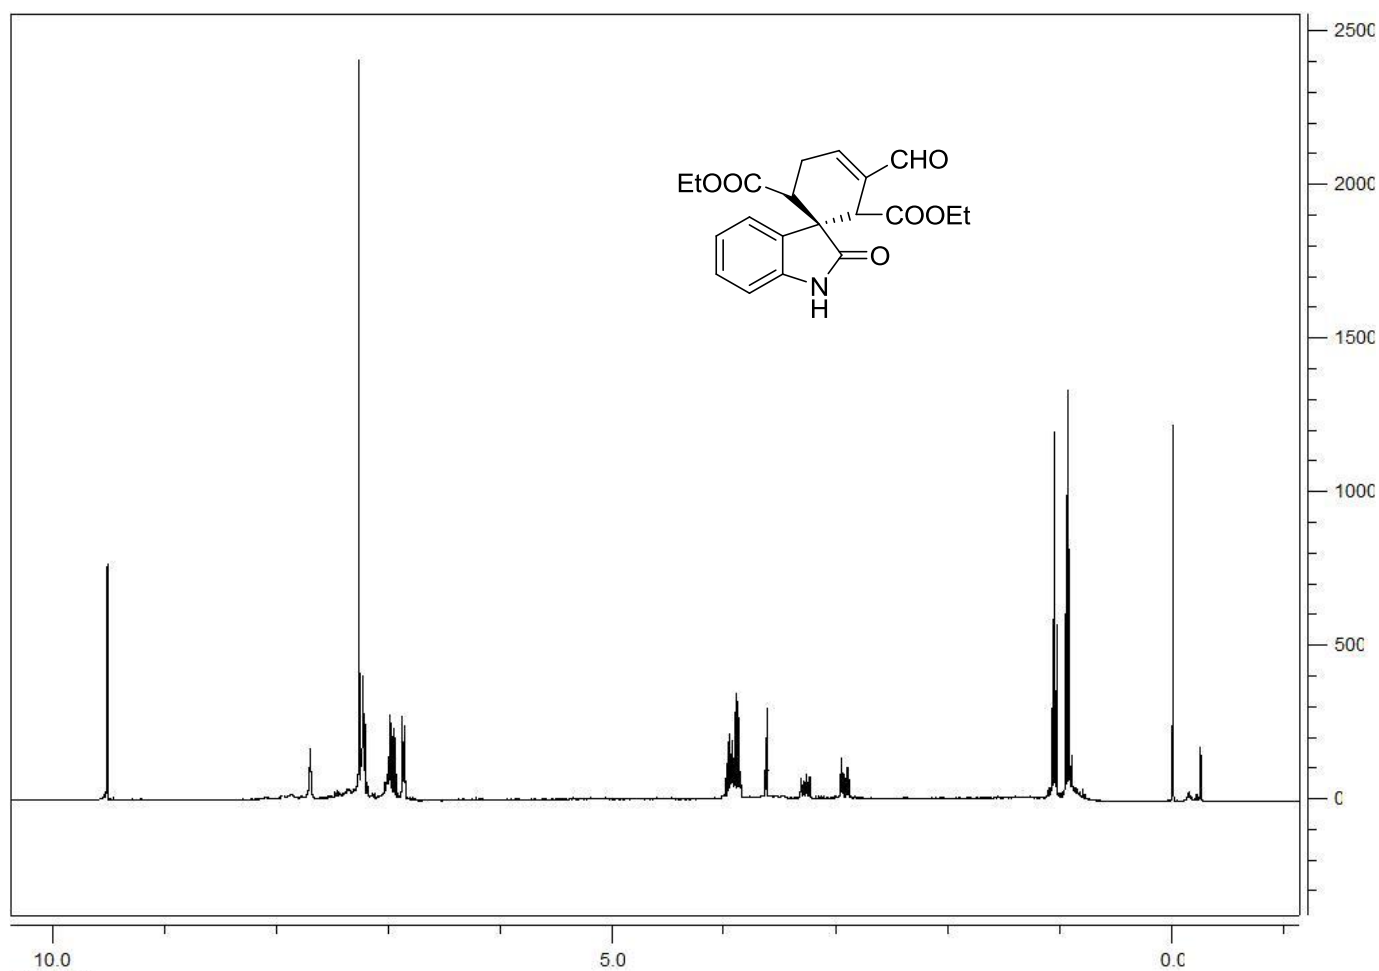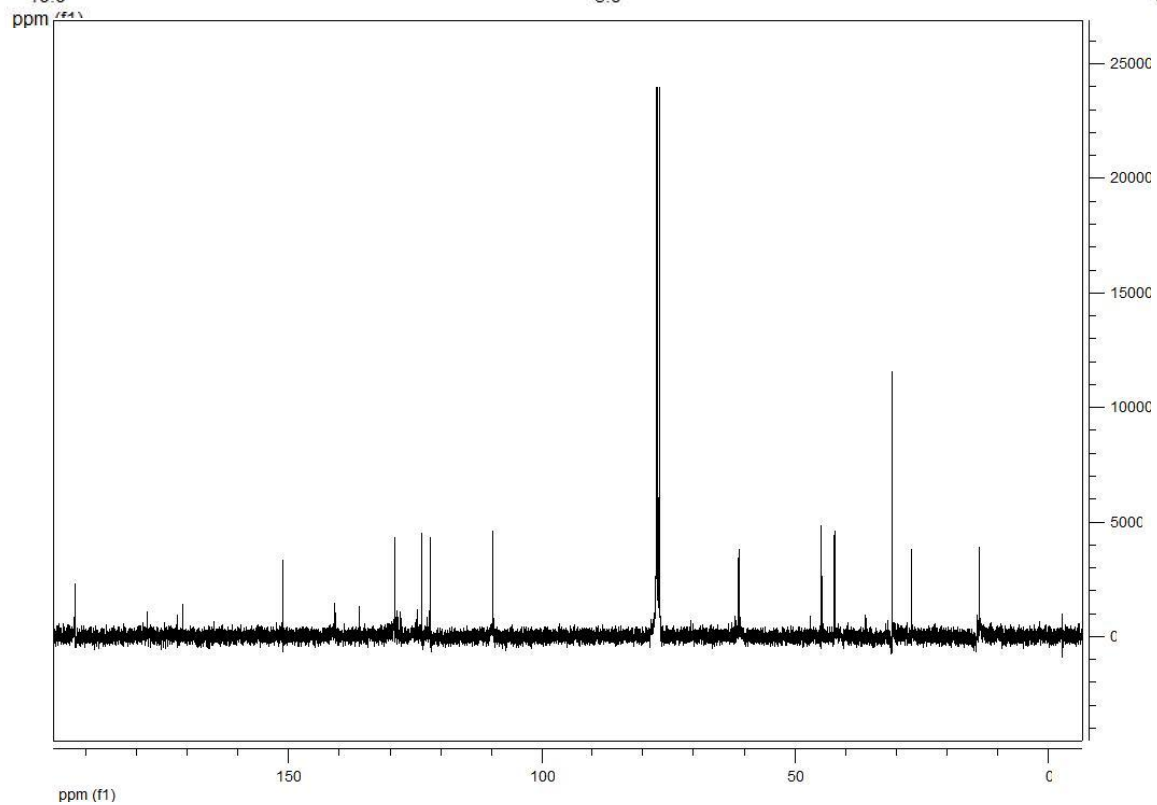



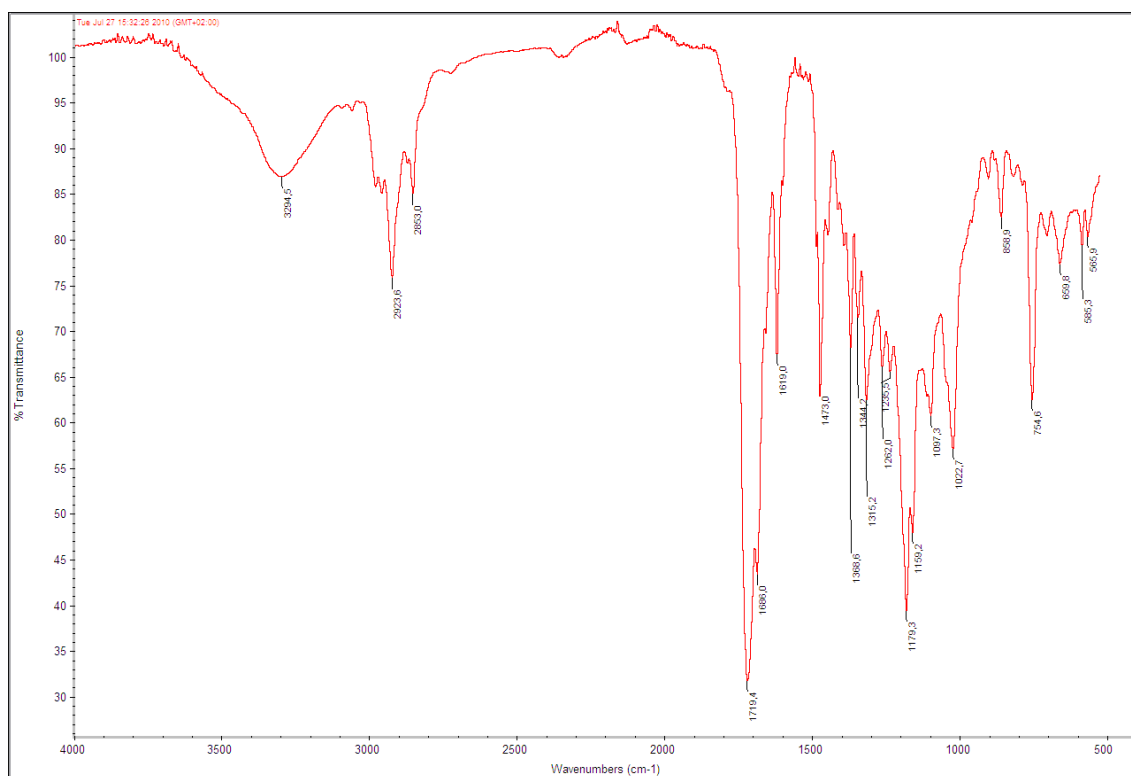

<Chromatogram>

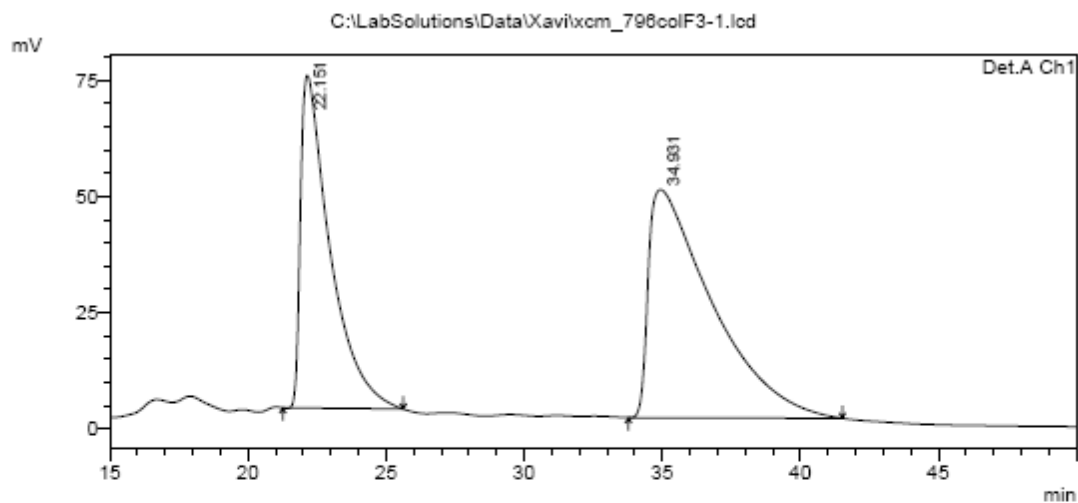

PeakTable

Detector A Ch1 254nm

| Peak# | Ret. Time | Area     | Height | Area %  | Height % |
|-------|-----------|----------|--------|---------|----------|
| 1     | 22.151    | 5323208  | 71555  | 40.365  | 59.328   |
| 2     | 34.931    | 7864429  | 49055  | 59.635  | 40.672   |
| Total |           | 13187638 | 120610 | 100.000 | 100.000  |

<Chromatogram>

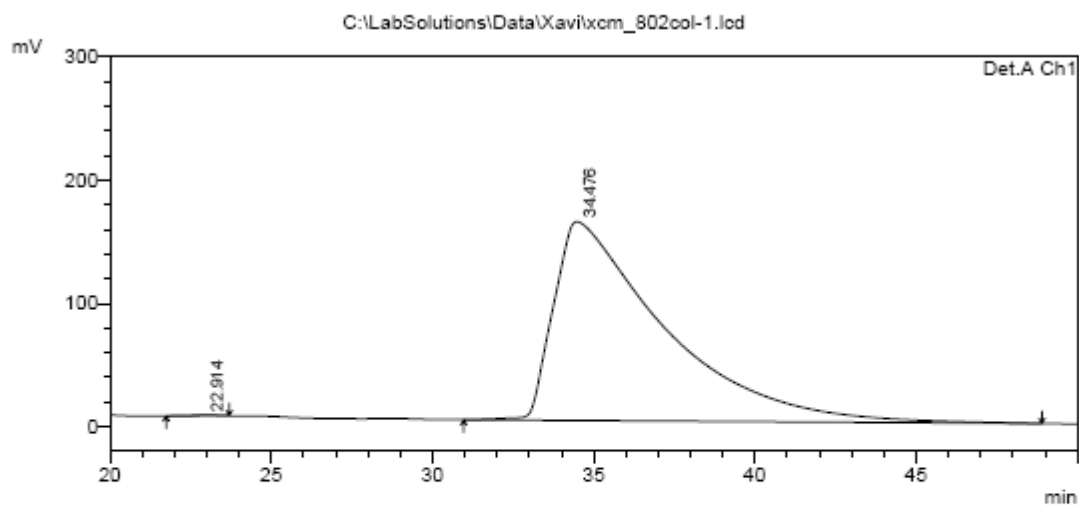

PeakTable

Detector A Ch1 254nm

| Peak# | Ret. Time | Area     | Height | Area %  | Height % |
|-------|-----------|----------|--------|---------|----------|
| 1     | 22.914    | 39881    | 579    | 0.104   | 0.358    |
| 2     | 34.476    | 38286891 | 161163 | 99.896  | 99.642   |
| Total |           | 38326772 | 161742 | 100.000 | 100.000  |

3g

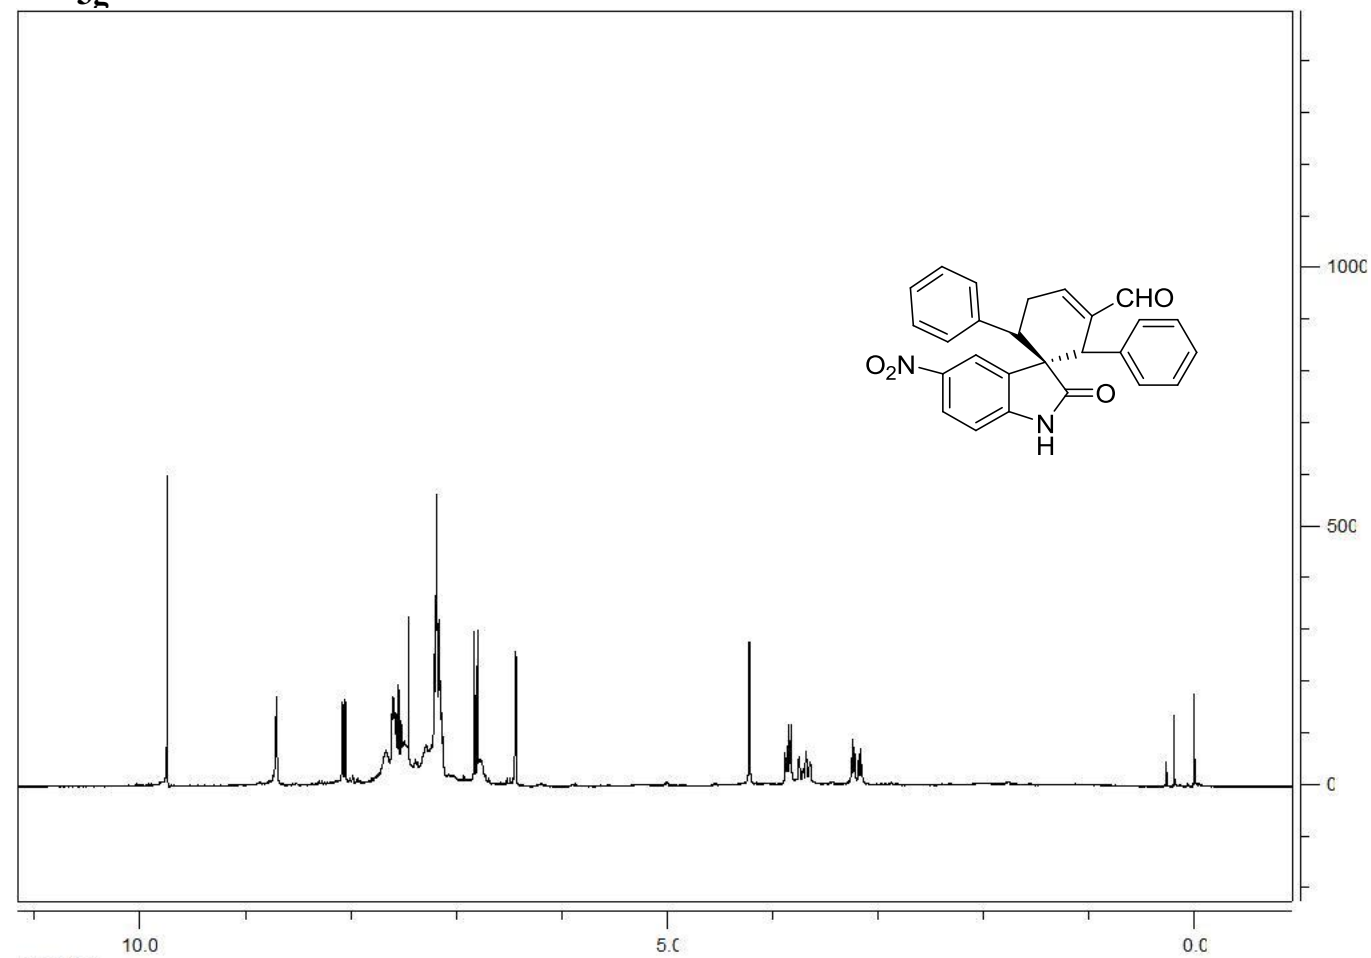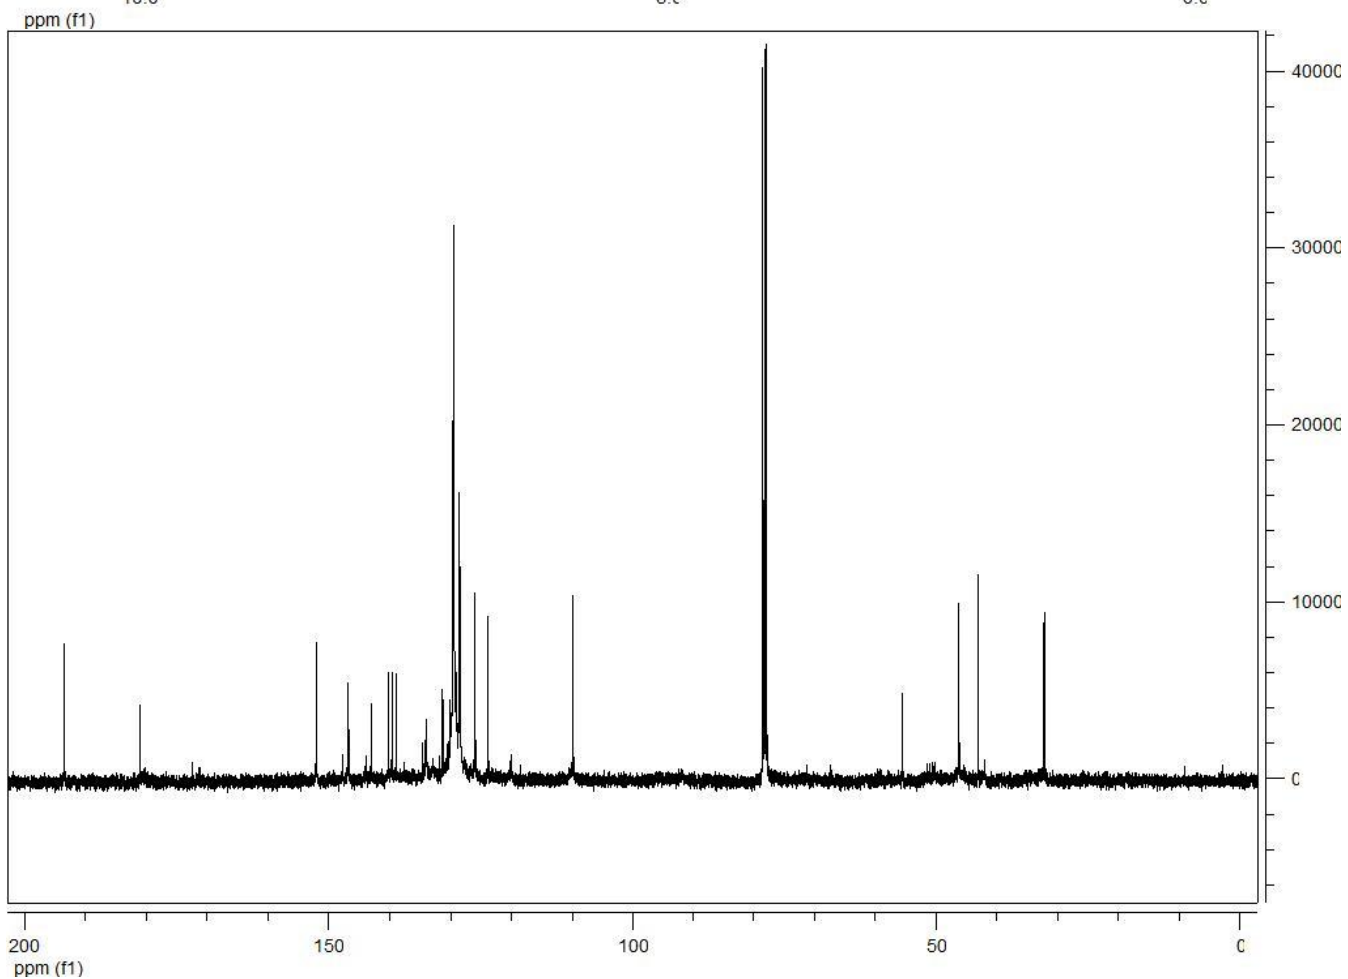

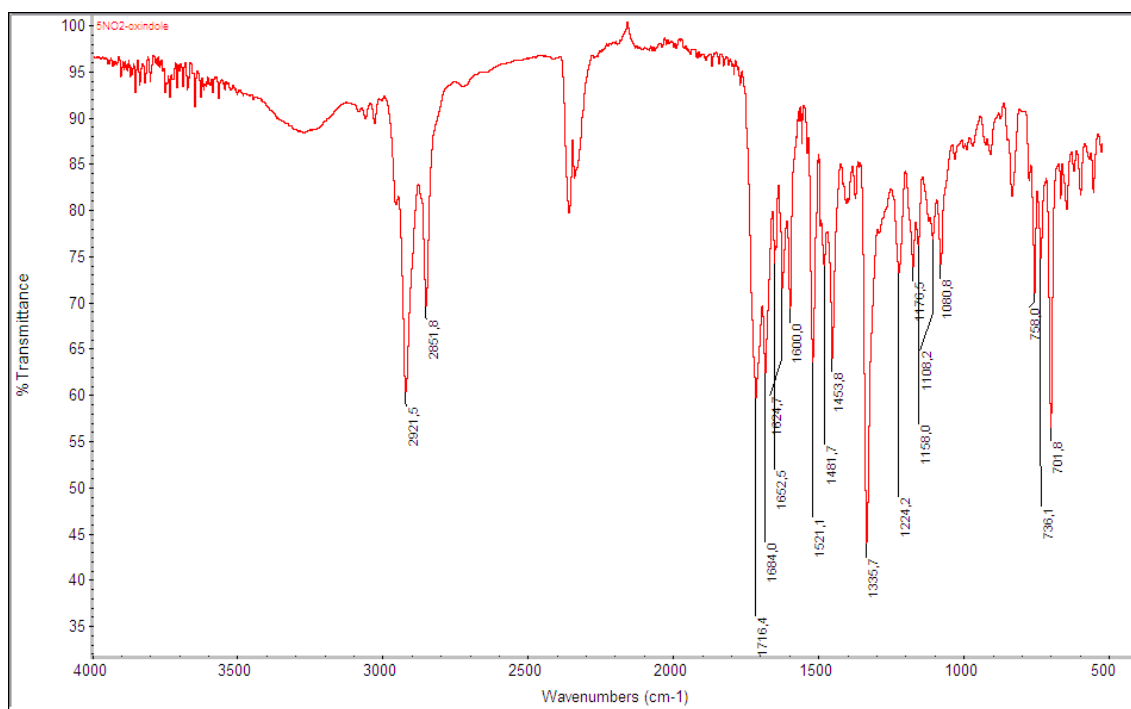

<Chromatogram>

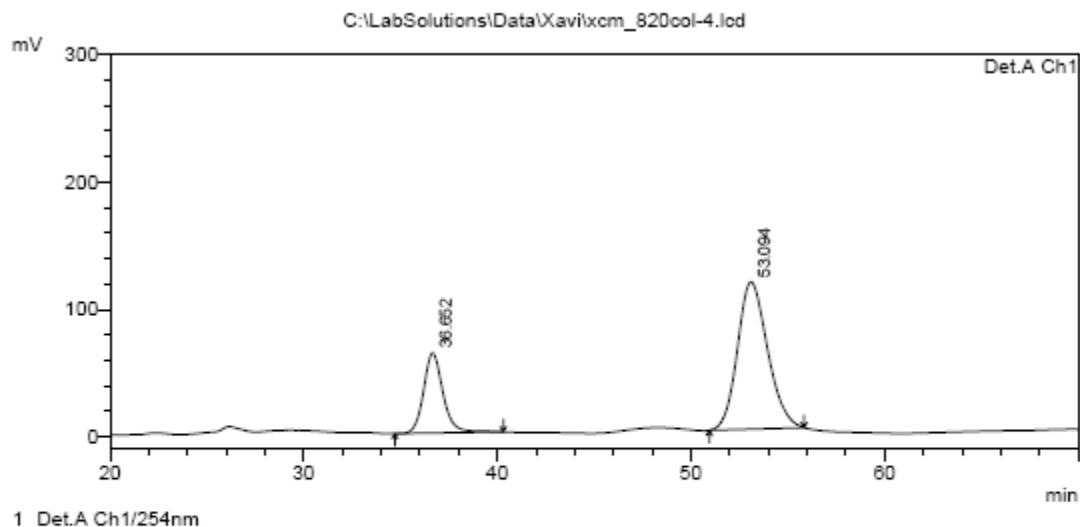

PeakTable

| Peak# | Ret. Time | Area     | Height | Area %  | Height % |
|-------|-----------|----------|--------|---------|----------|
| 1     | 36.652    | 4397679  | 62889  | 25.976  | 35.212   |
| 2     | 53.094    | 12531786 | 115714 | 74.024  | 64.788   |
| Total |           | 16929465 | 178602 | 100.000 | 100.000  |

<Chromatogram>

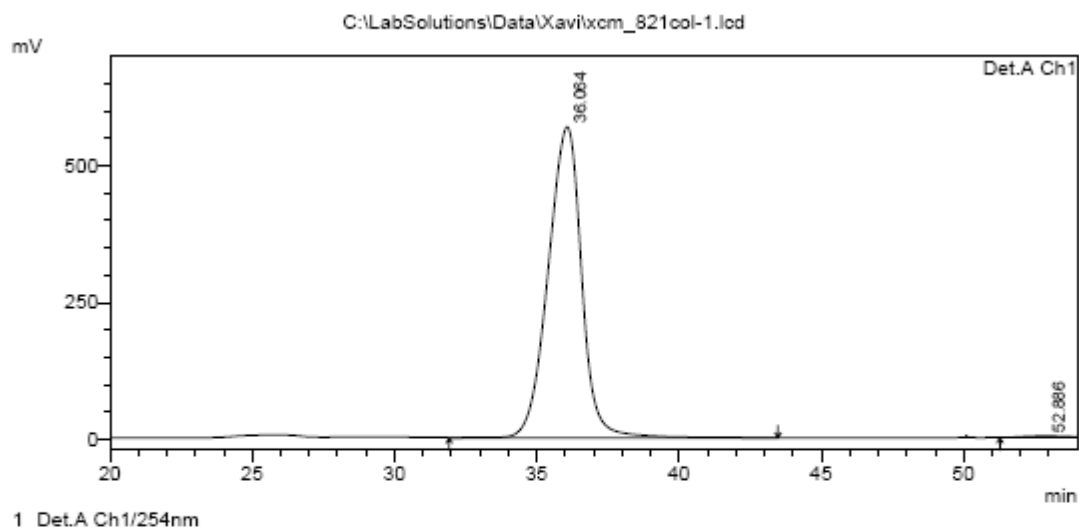

PeakTable

| Peak# | Ret. Time | Area     | Height | Area %  | Height % |
|-------|-----------|----------|--------|---------|----------|
| 1     | 36.064    | 46588129 | 568622 | 99.354  | 99.503   |
| 2     | 52.886    | 302858   | 2842   | 0.646   | 0.497    |
| Total |           | 46890987 | 571464 | 100.000 | 100.000  |

3j

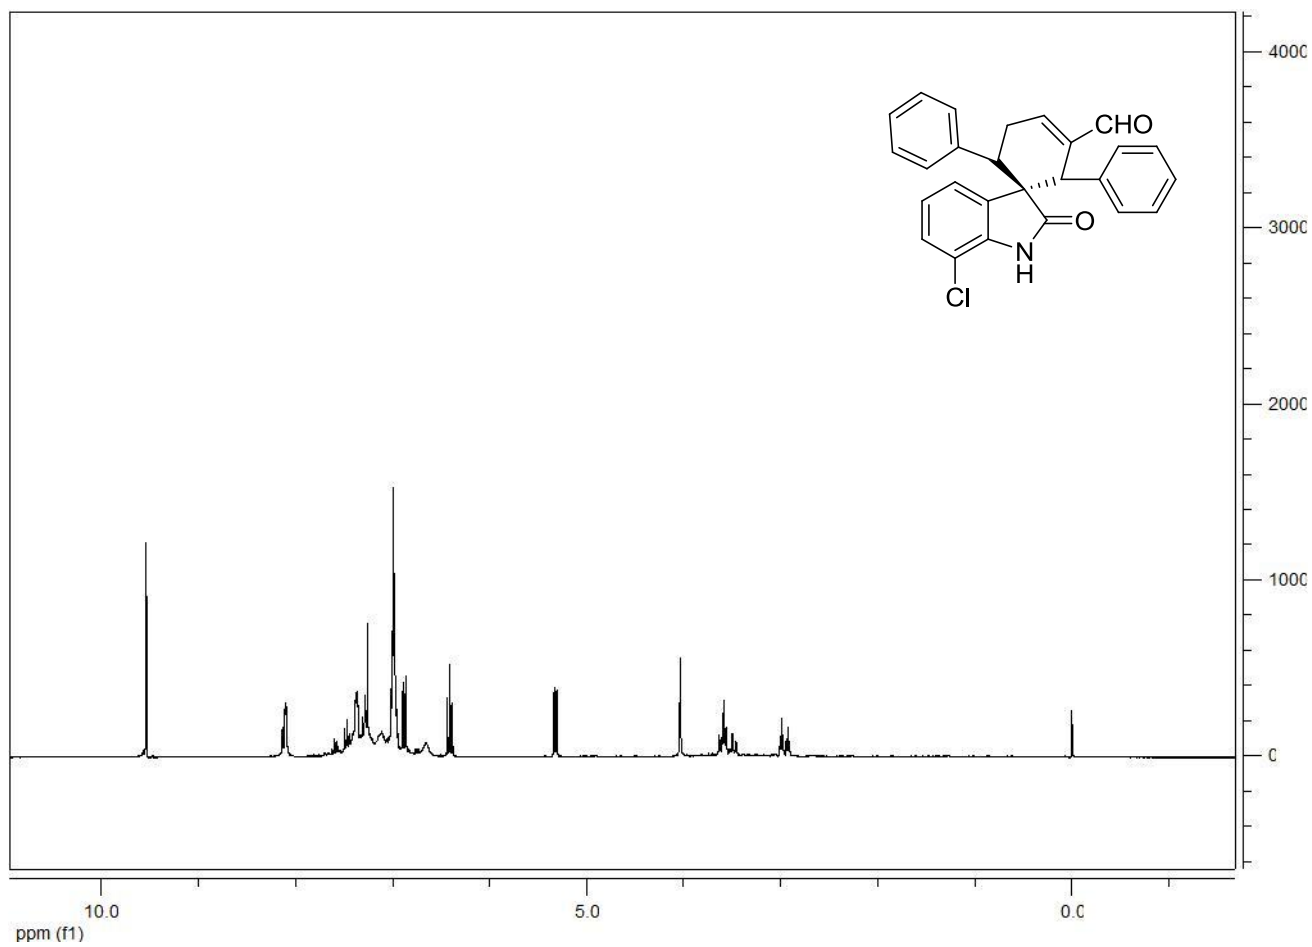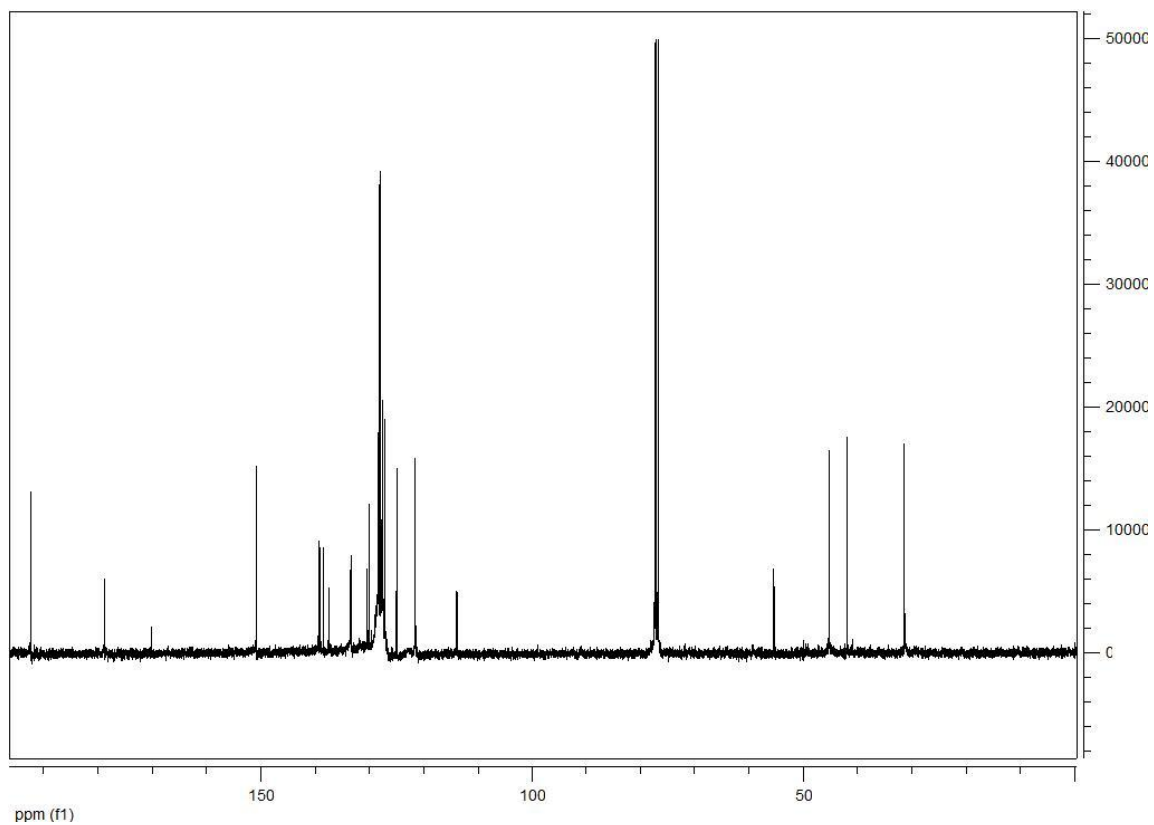

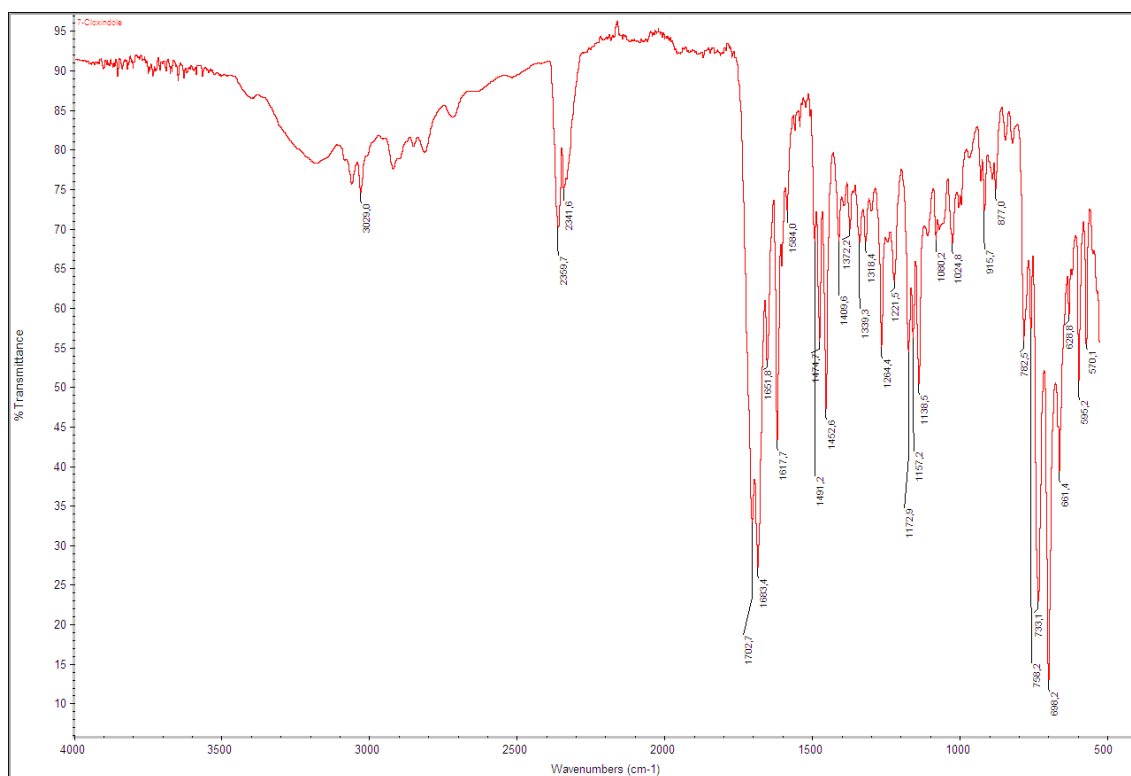

<Chromatogram>

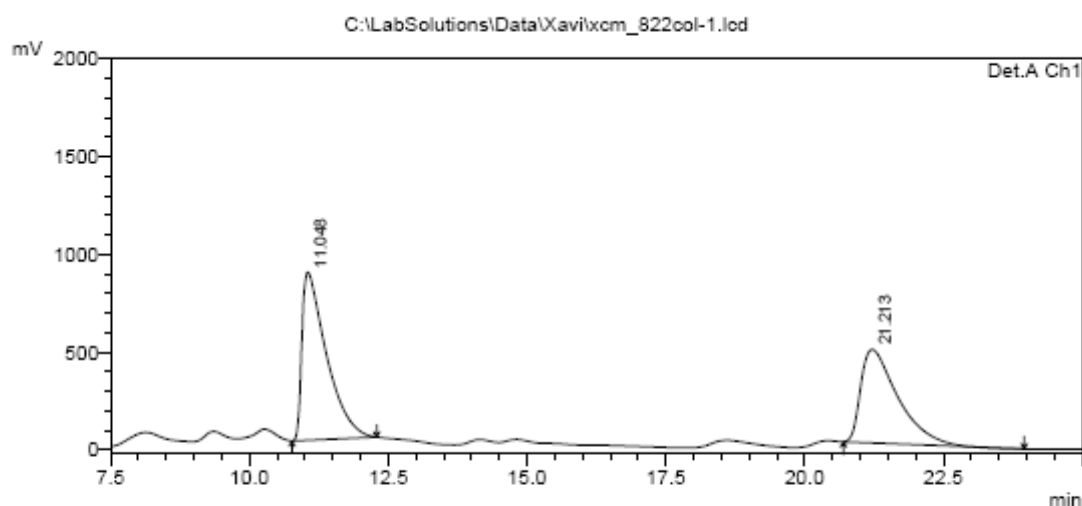

PeakTable

| Peak# | Ret. Time | Area     | Height  | Area %  | Height % |
|-------|-----------|----------|---------|---------|----------|
| 1     | 11.048    | 26371704 | 858797  | 54.357  | 64.249   |
| 2     | 21.213    | 22143851 | 477878  | 45.643  | 35.751   |
| Total |           | 48515555 | 1336675 | 100.000 | 100.000  |

<Chromatogram>

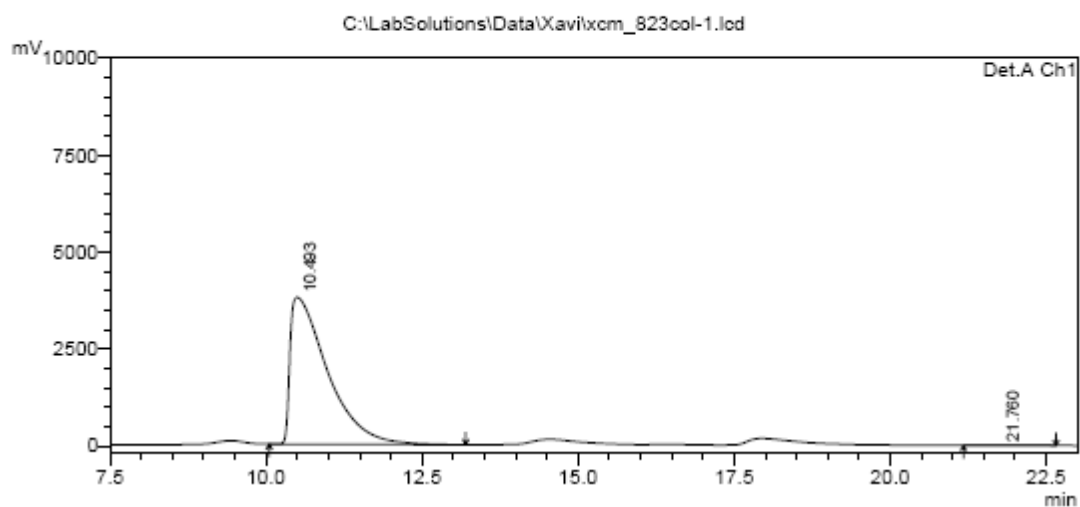

PeakTable

| Peak# | Ret. Time | Area      | Height  | Area %  | Height % |
|-------|-----------|-----------|---------|---------|----------|
| 1     | 10.493    | 157844384 | 3798915 | 99.941  | 99.939   |
| 2     | 21.760    | 93220     | 2307    | 0.059   | 0.061    |
| Total |           | 157937604 | 3801222 | 100.000 | 100.000  |



3i

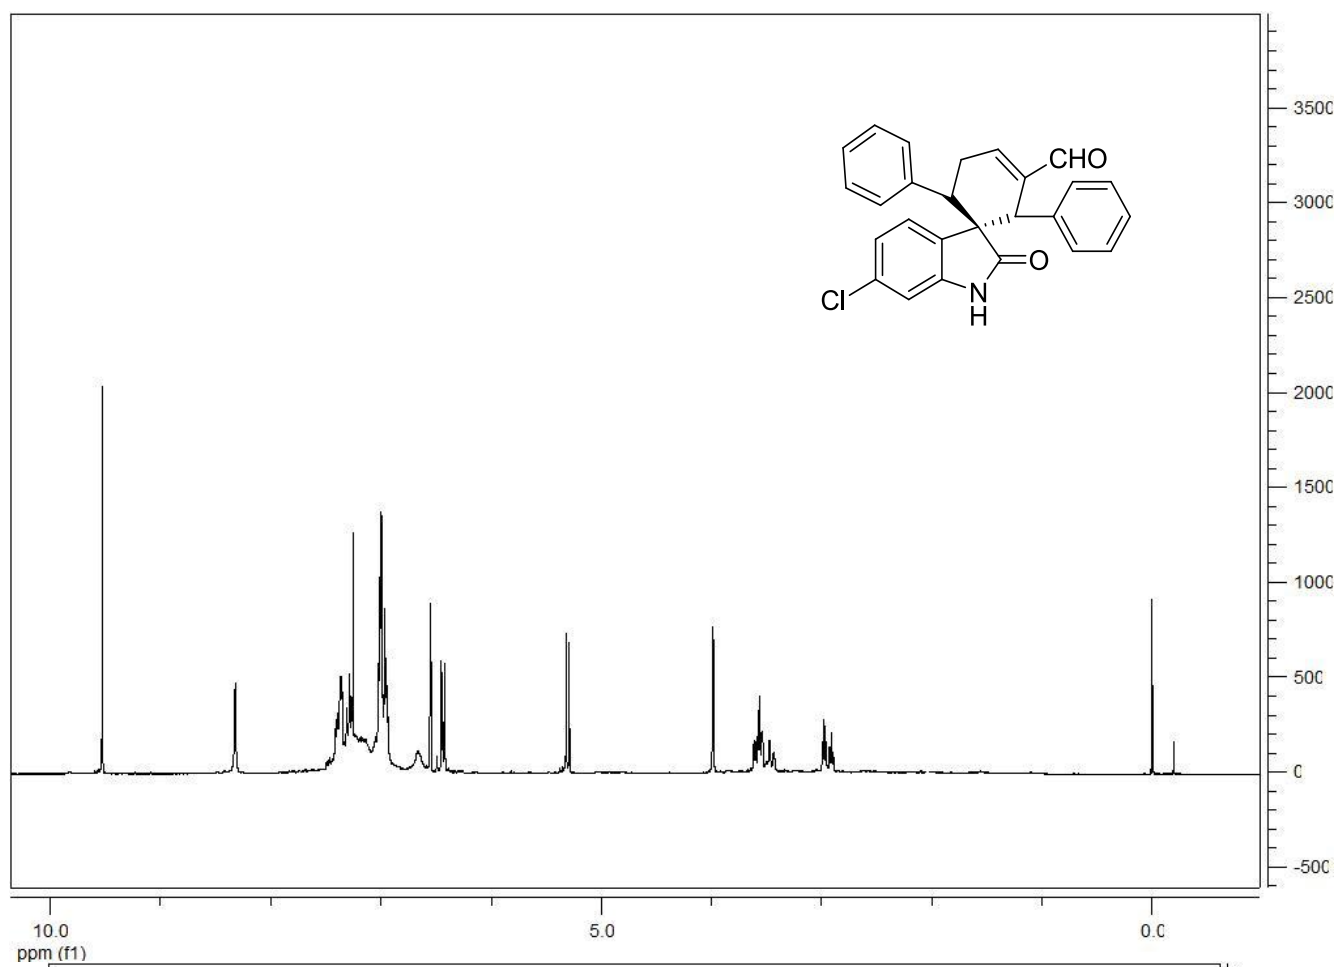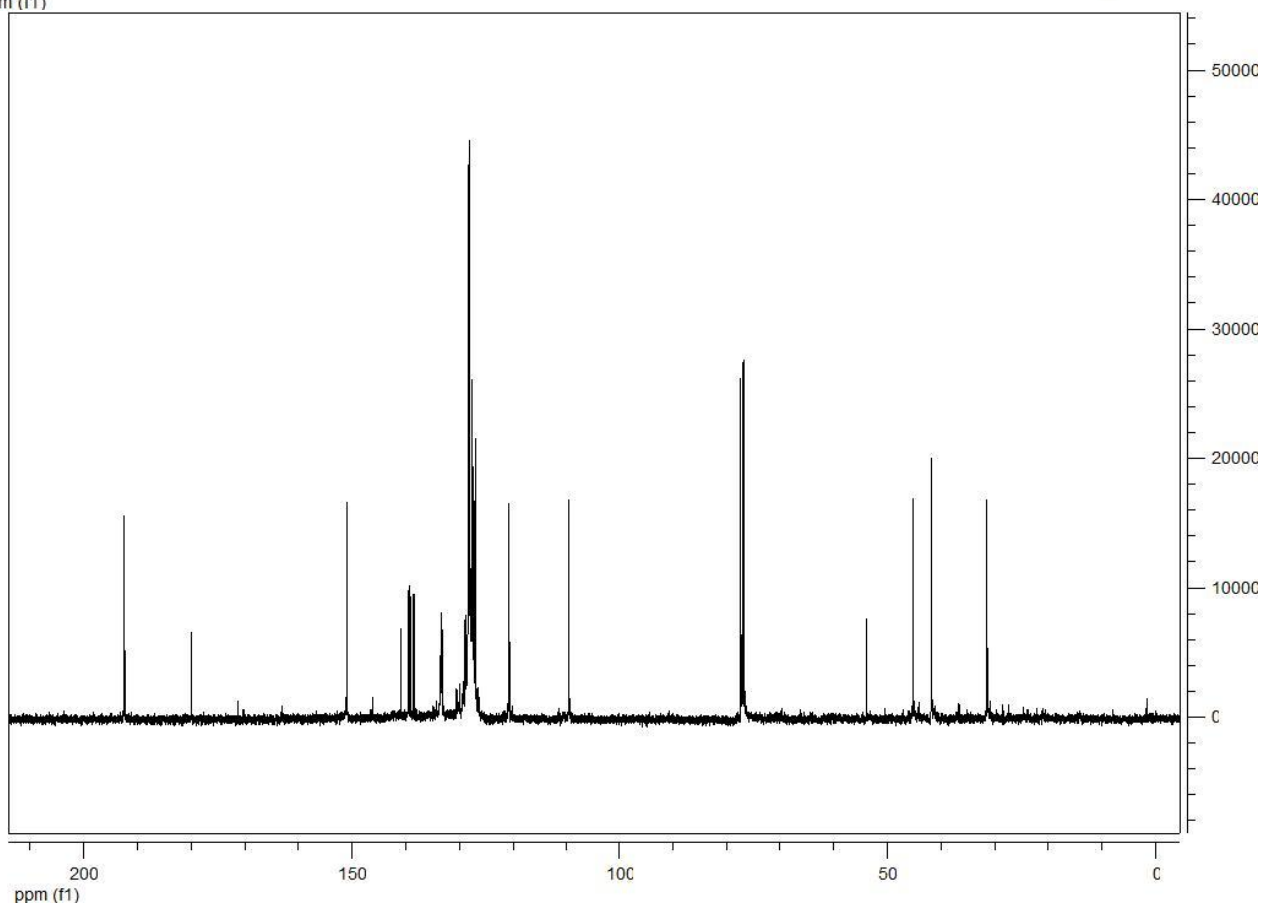

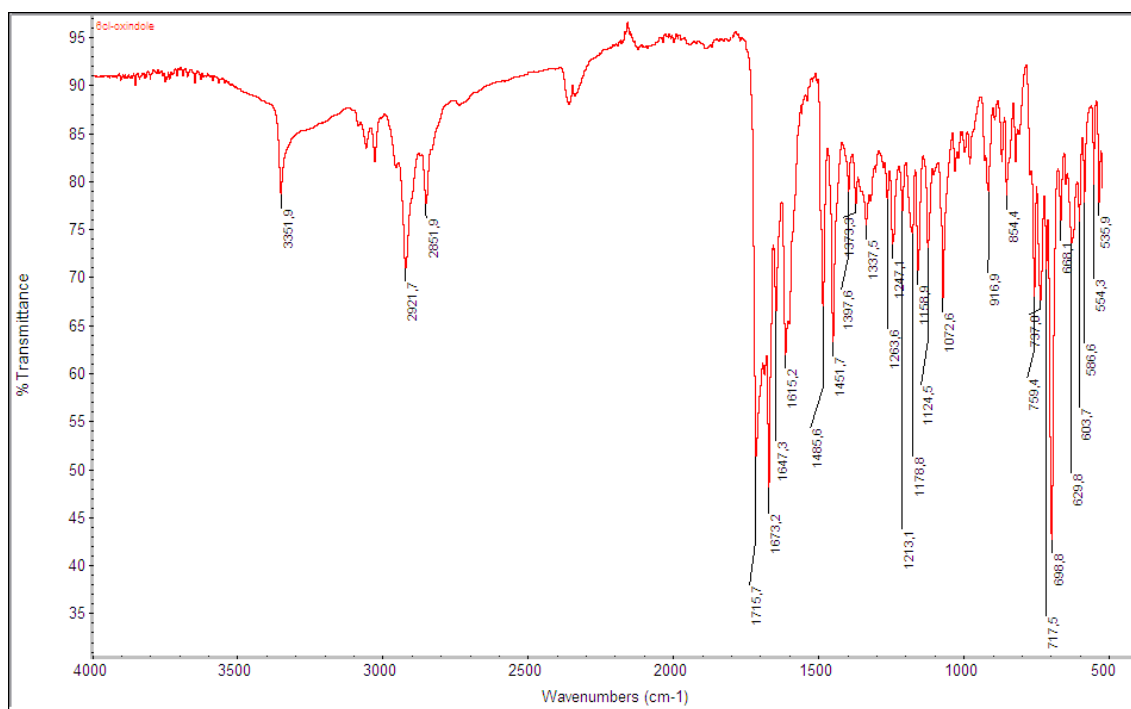

<Chromatogram>

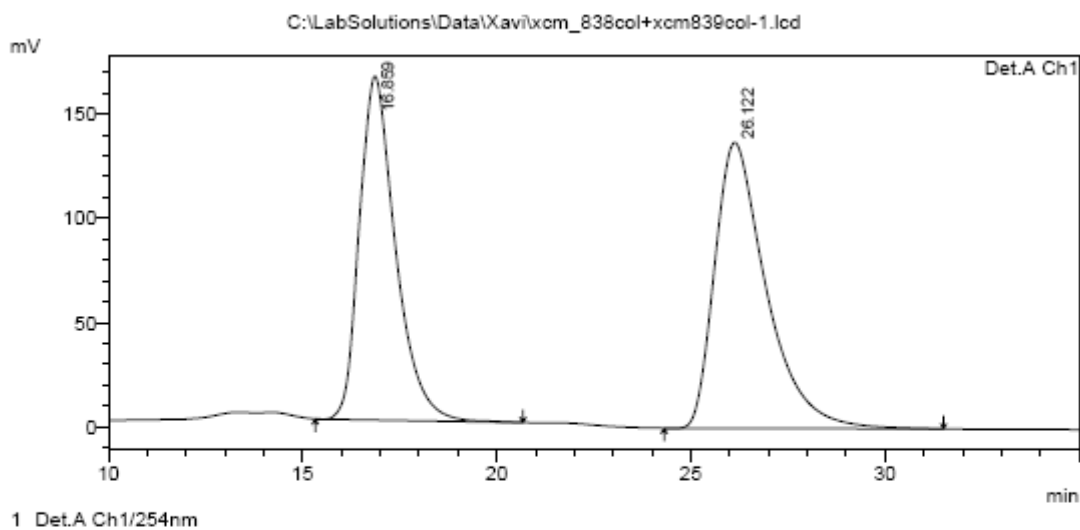

PeakTable

| Peak# | Ret. Time | Area     | Height | Area %  | Height % |
|-------|-----------|----------|--------|---------|----------|
| 1     | 16.859    | 10686130 | 164738 | 45.835  | 54.606   |
| 2     | 26.122    | 12628253 | 136947 | 54.165  | 45.394   |
| Total |           | 23314383 | 301685 | 100.000 | 100.000  |

<Chromatogram>

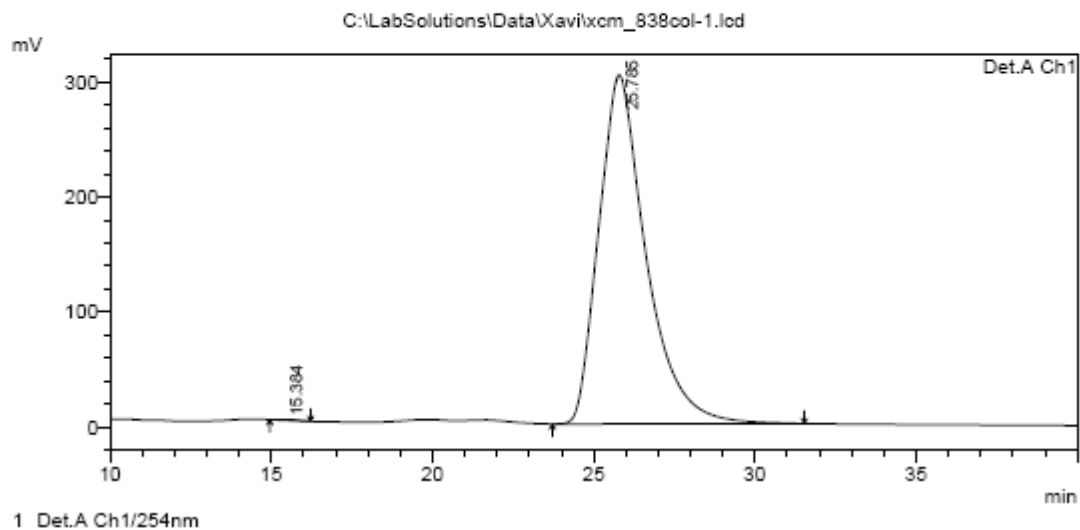

PeakTable

| Peak# | Ret. Time | Area     | Height | Area %  | Height % |
|-------|-----------|----------|--------|---------|----------|
| 1     | 15.384    | 28011    | 505    | 0.091   | 0.166    |
| 2     | 25.785    | 30852535 | 303490 | 99.909  | 99.834   |
| Total |           | 30880546 | 303995 | 100.000 | 100.000  |

<Chromatogram>

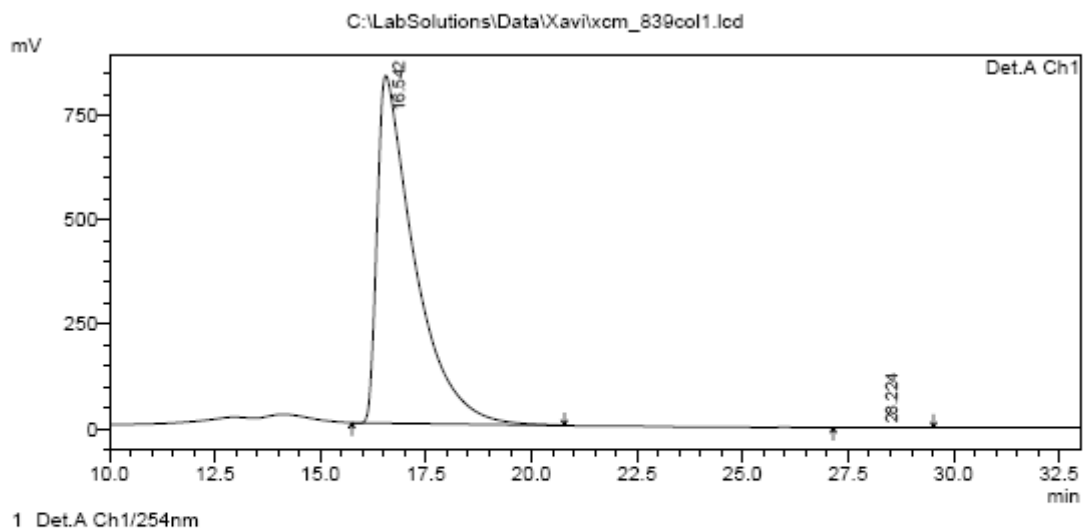

PeakTable

Detector A Ch1 254nm

| Peak# | Ret. Time | Area     | Height | Area %  | Height % |
|-------|-----------|----------|--------|---------|----------|
| 1     | 16.542    | 50940822 | 831369 | 99.915  | 99.923   |
| 2     | 28.224    | 43457    | 638    | 0.085   | 0.077    |
| Total |           | 50984279 | 832007 | 100.000 | 100.000  |

31

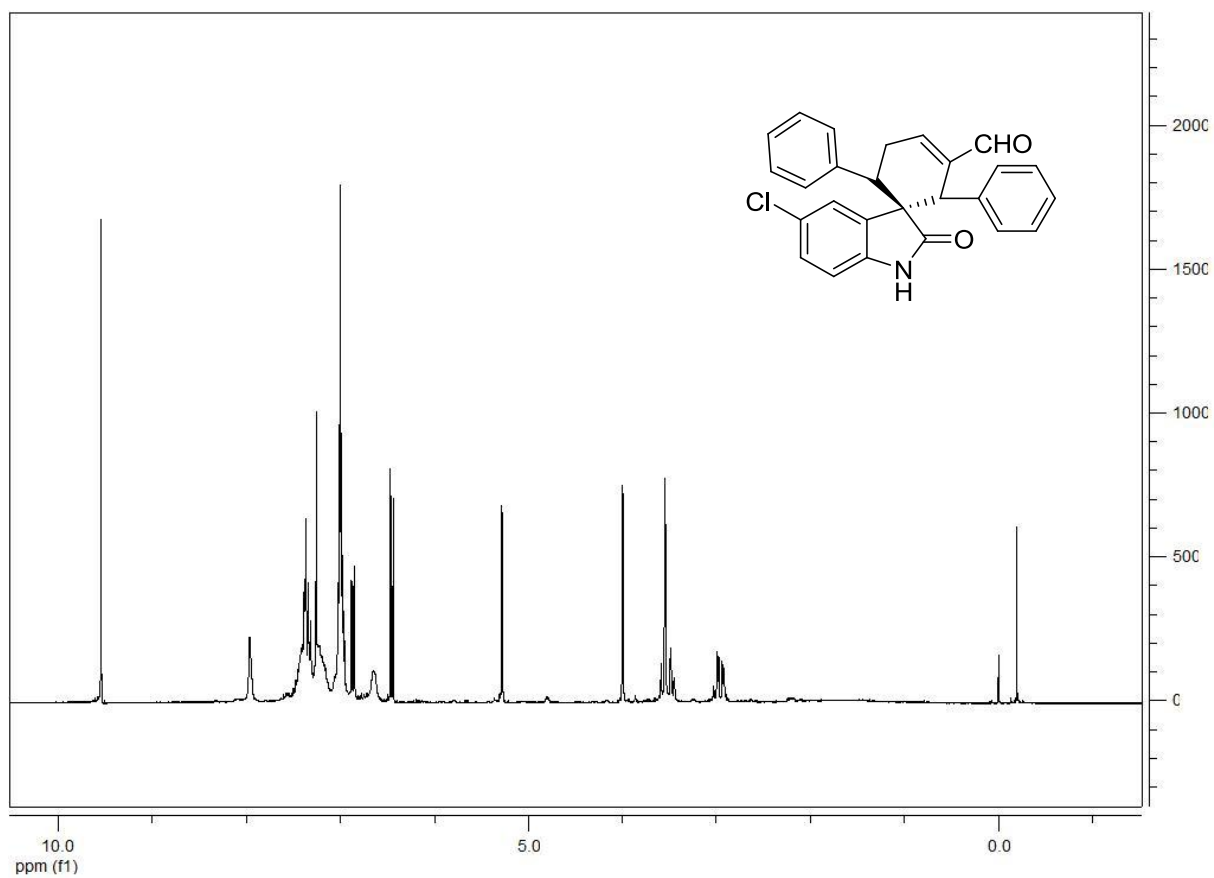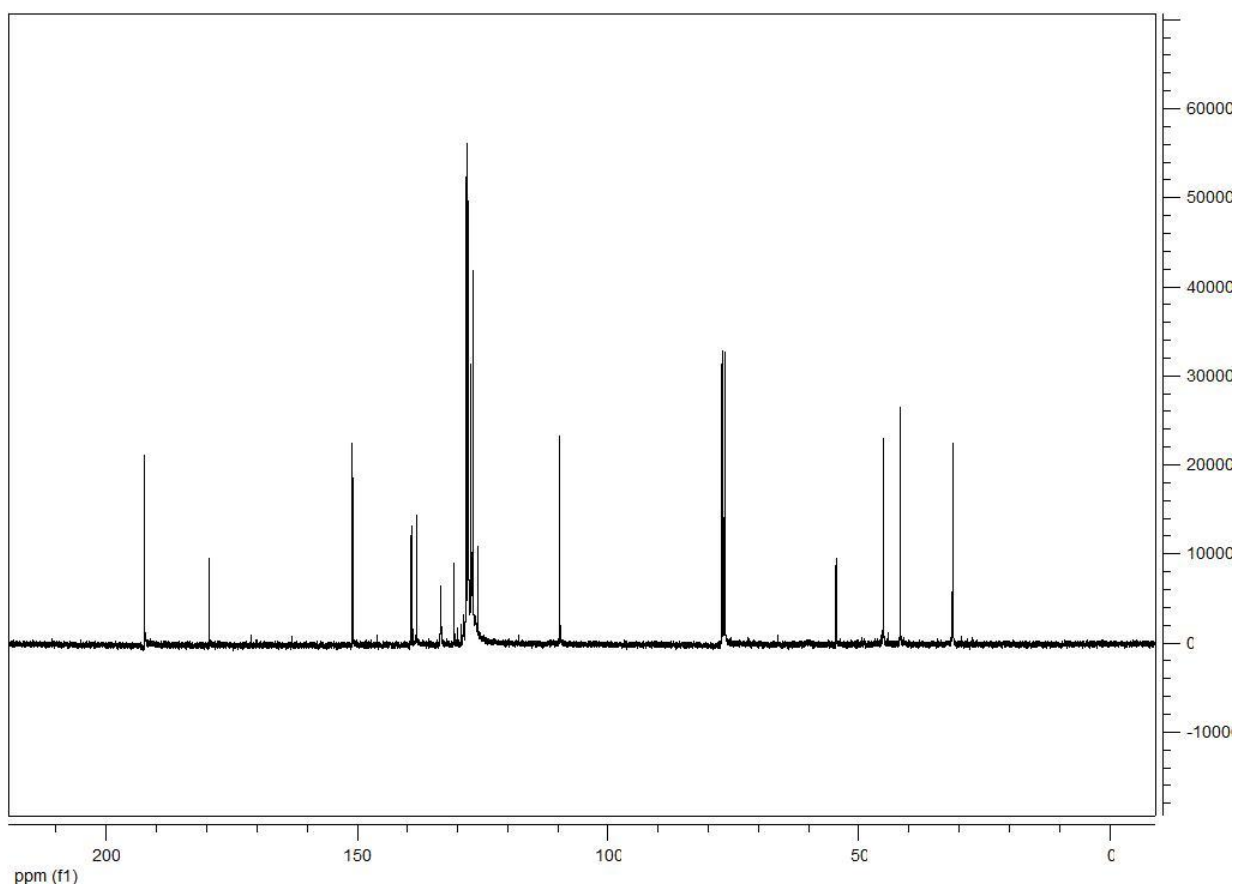

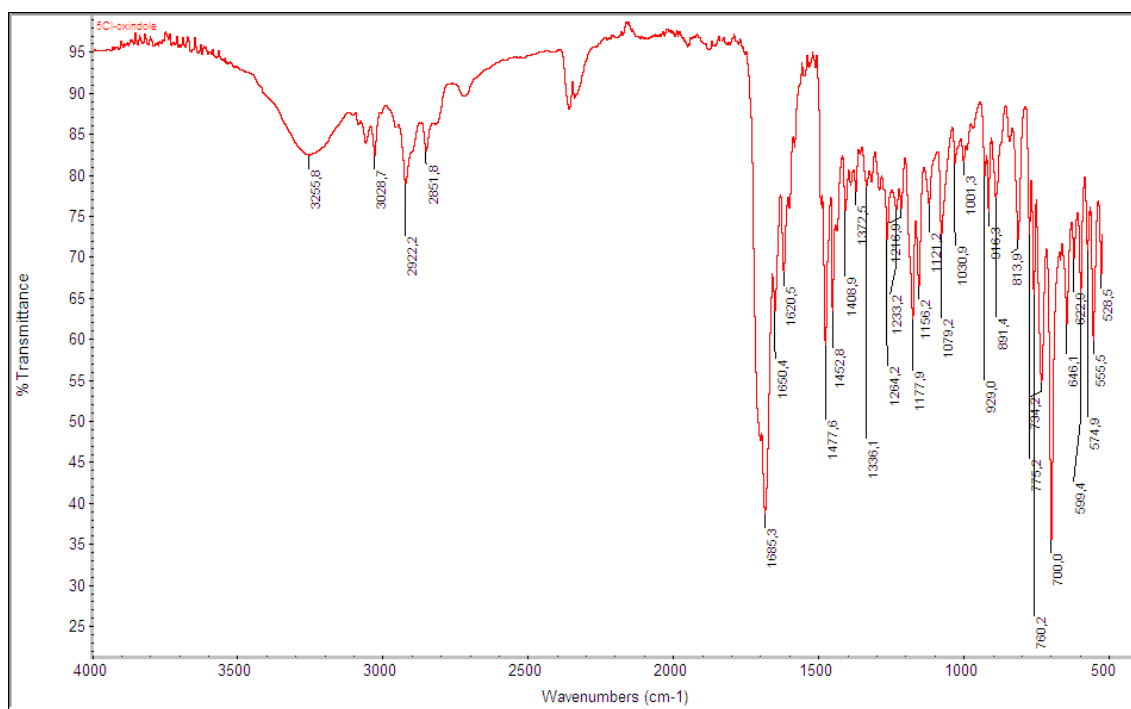

<Chromatogram>

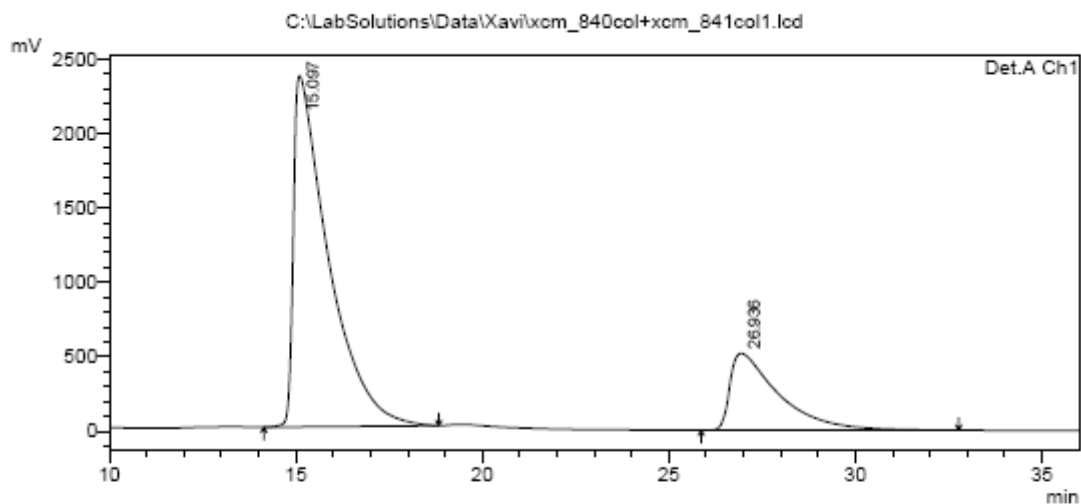

PeakTable

| Detector A Ch1 254nm |           |           |         |         |          |
|----------------------|-----------|-----------|---------|---------|----------|
| Peak#                | Ret. Time | Area      | Height  | Area %  | Height % |
| 1                    | 15.097    | 153463370 | 2358727 | 76.643  | 82.053   |
| 2                    | 26.936    | 46766944  | 515920  | 23.357  | 17.947   |
| Total                |           | 200230315 | 2874646 | 100.000 | 100.000  |

<Chromatogram>

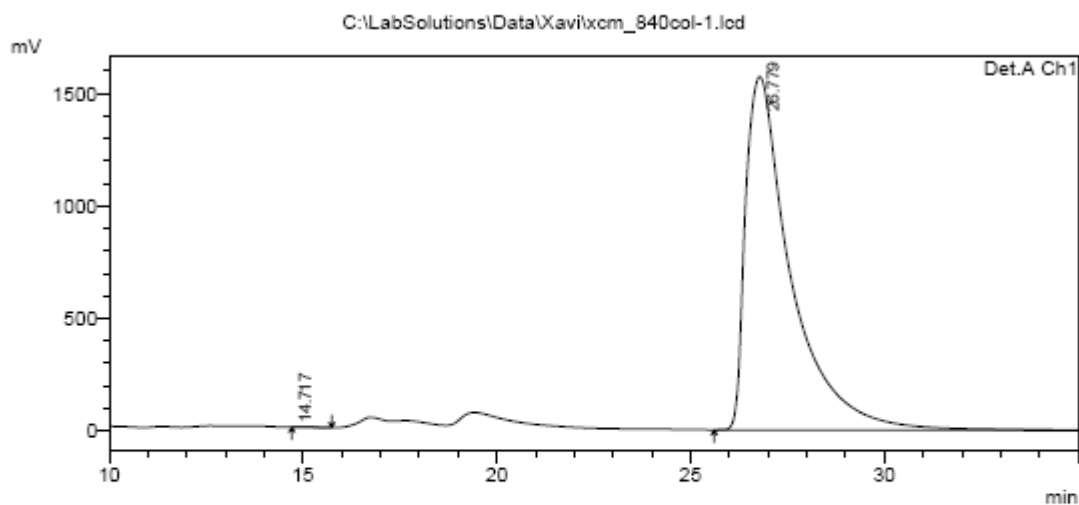

PeakTable

| Detector A Ch1 254nm |           |           |         |         |          |
|----------------------|-----------|-----------|---------|---------|----------|
| Peak#                | Ret. Time | Area      | Height  | Area %  | Height % |
| 1                    | 14.717    | 19727     | 11      | 0.015   | 0.001    |
| 2                    | 26.779    | 128202823 | 1571239 | 99.985  | 99.999   |
| Total                |           | 128222550 | 1571249 | 100.000 | 100.000  |

<Chromatogram>

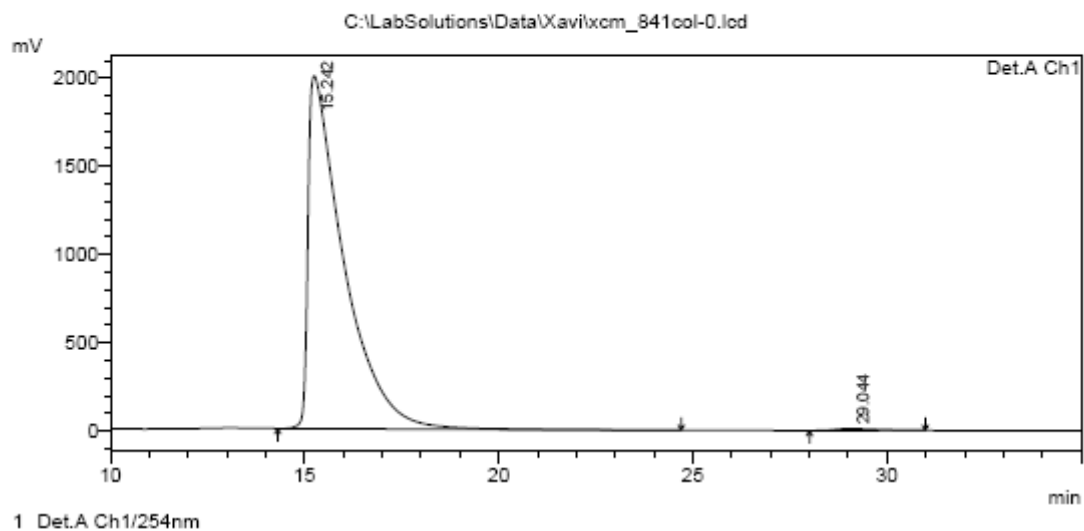

PeakTable

| Peak# | Ret. Time | Area      | Height  | Area %  | Height % |
|-------|-----------|-----------|---------|---------|----------|
| 1     | 15.242    | 127639622 | 1998901 | 99.412  | 99.494   |
| 2     | 29.044    | 754654    | 10164   | 0.588   | 0.506    |
| Total |           | 128394276 | 2009065 | 100.000 | 100.000  |



3b

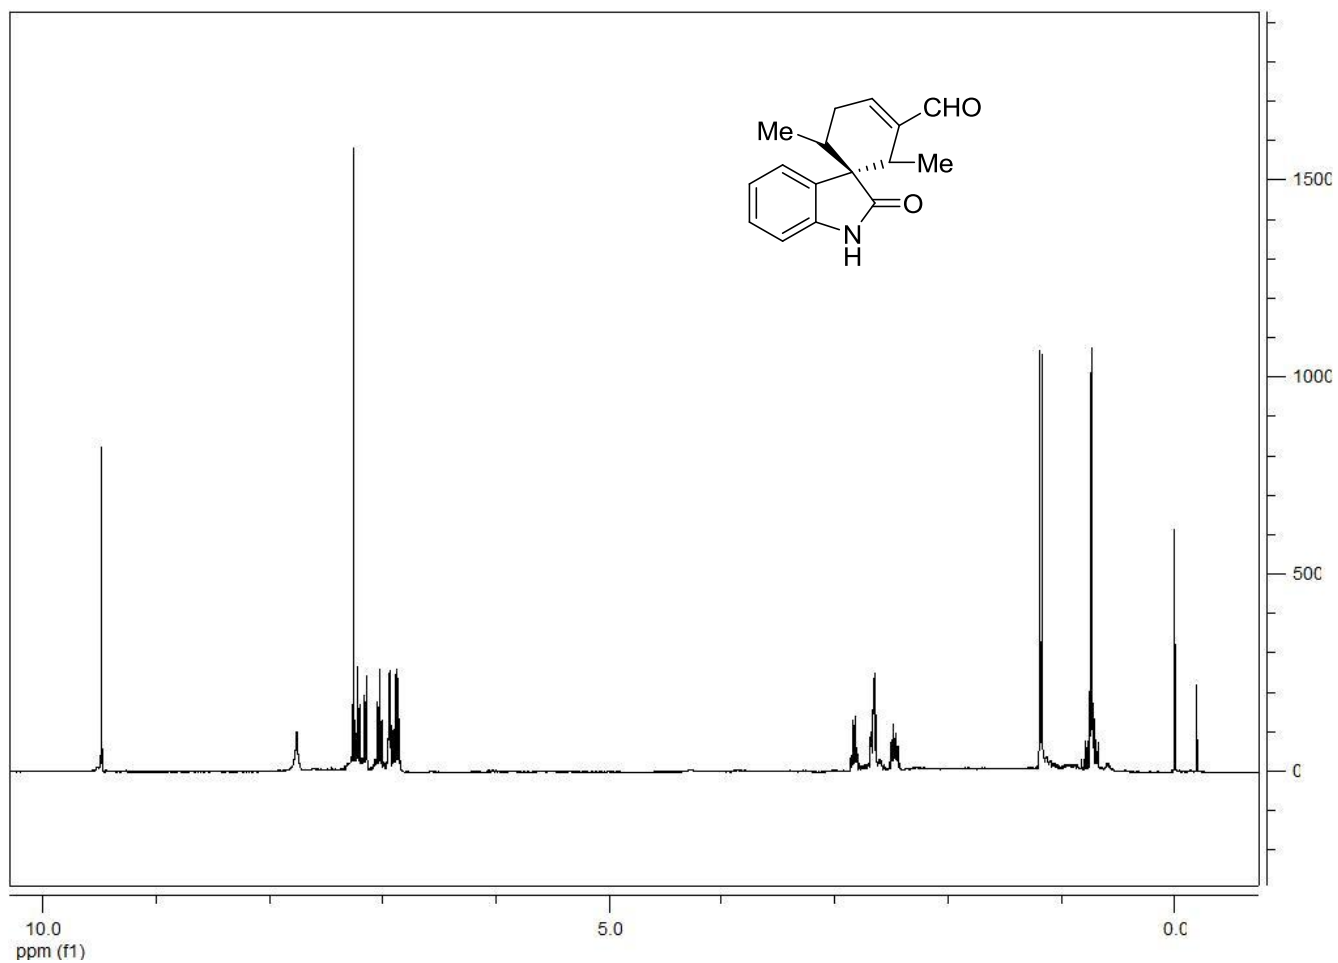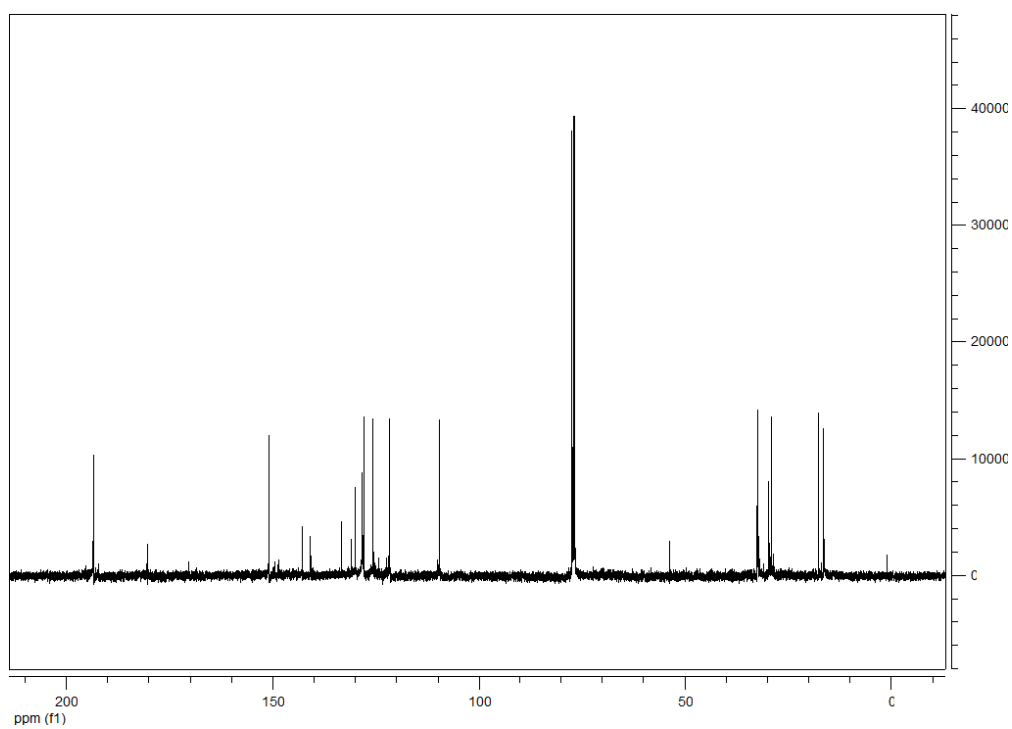

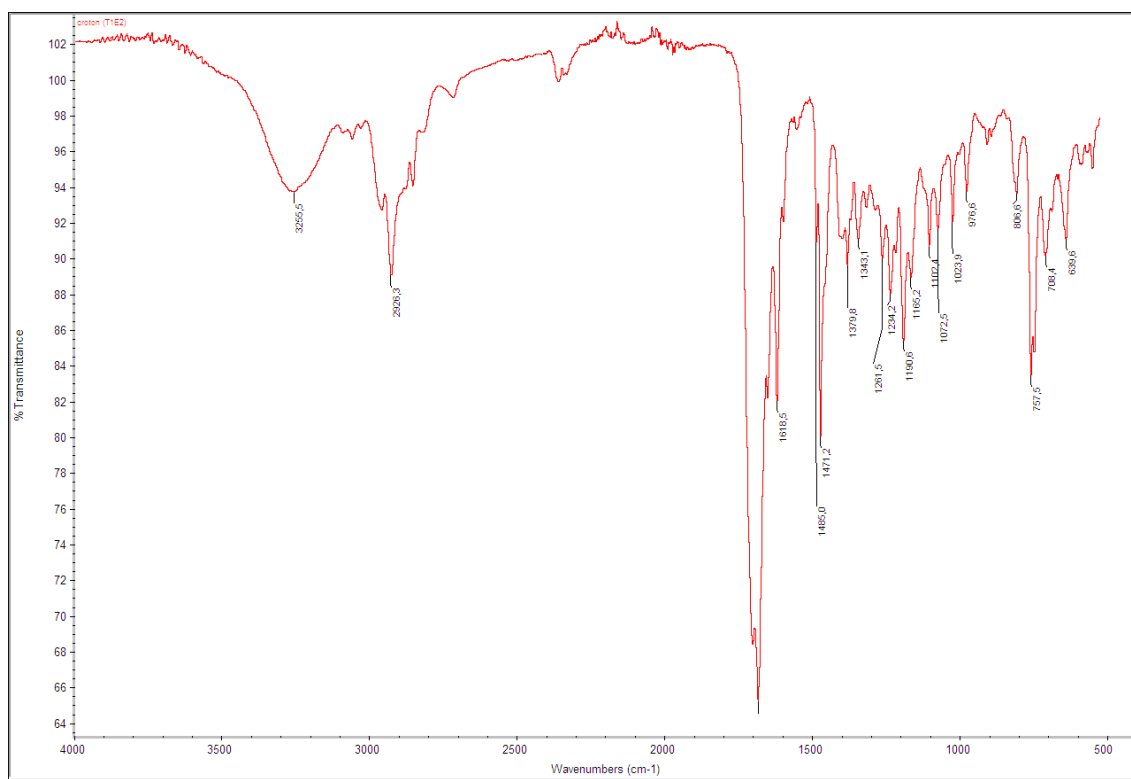

<Chromatogram>

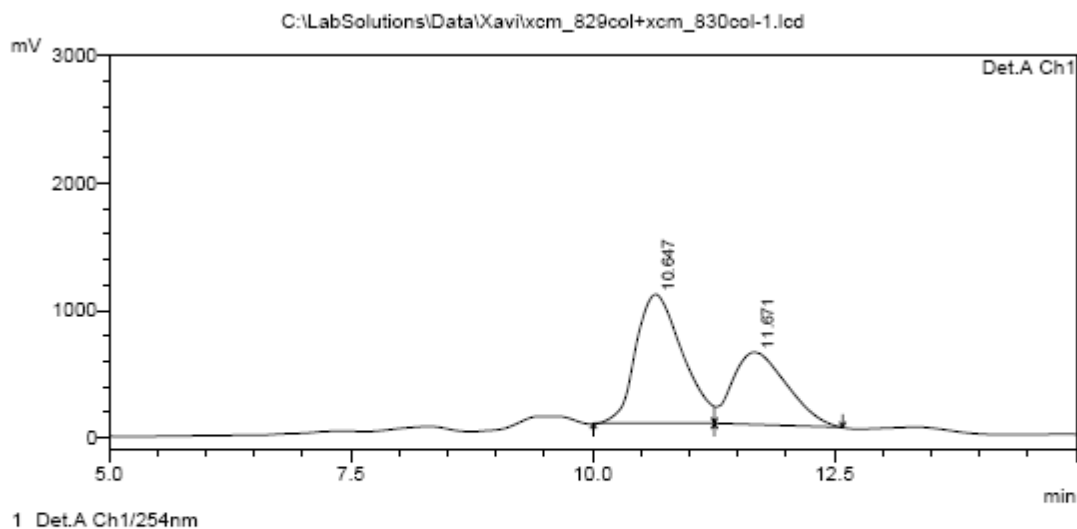

PeakTable

| Peak# | Ret. Time | Area     | Height  | Area %  | Height % |
|-------|-----------|----------|---------|---------|----------|
| 1     | 10.647    | 33808568 | 1011029 | 60.415  | 63.990   |
| 2     | 11.671    | 22152336 | 568940  | 39.585  | 36.010   |
| Total |           | 55960904 | 1579969 | 100.000 | 100.000  |

<Chromatogram>

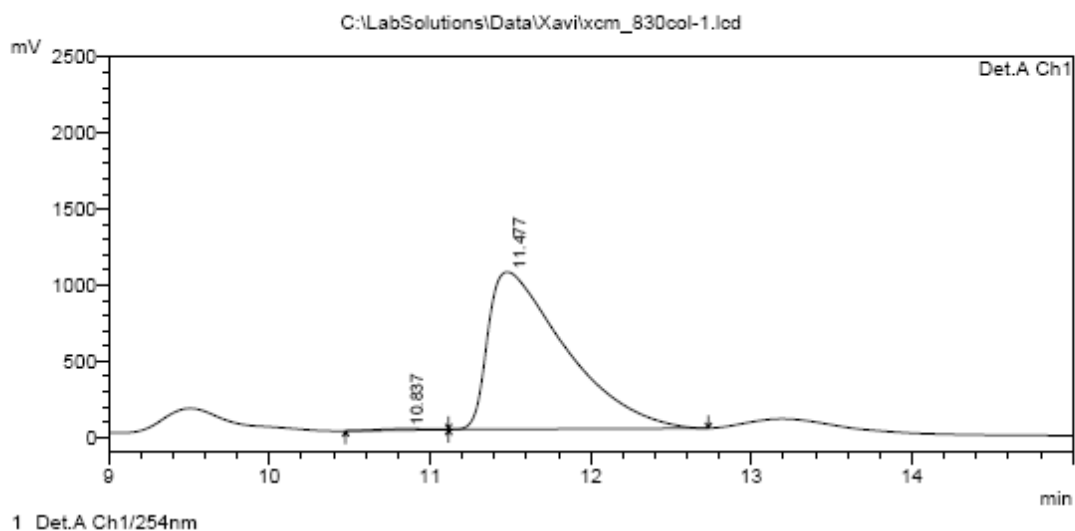

PeakTable

| Peak# | Ret. Time | Area     | Height  | Area %  | Height % |
|-------|-----------|----------|---------|---------|----------|
| 1     | 10.837    | 175906   | 8341    | 0.506   | 0.801    |
| 2     | 11.477    | 34583478 | 1033246 | 99.494  | 99.199   |
| Total |           | 34759384 | 1041587 | 100.000 | 100.000  |

3k

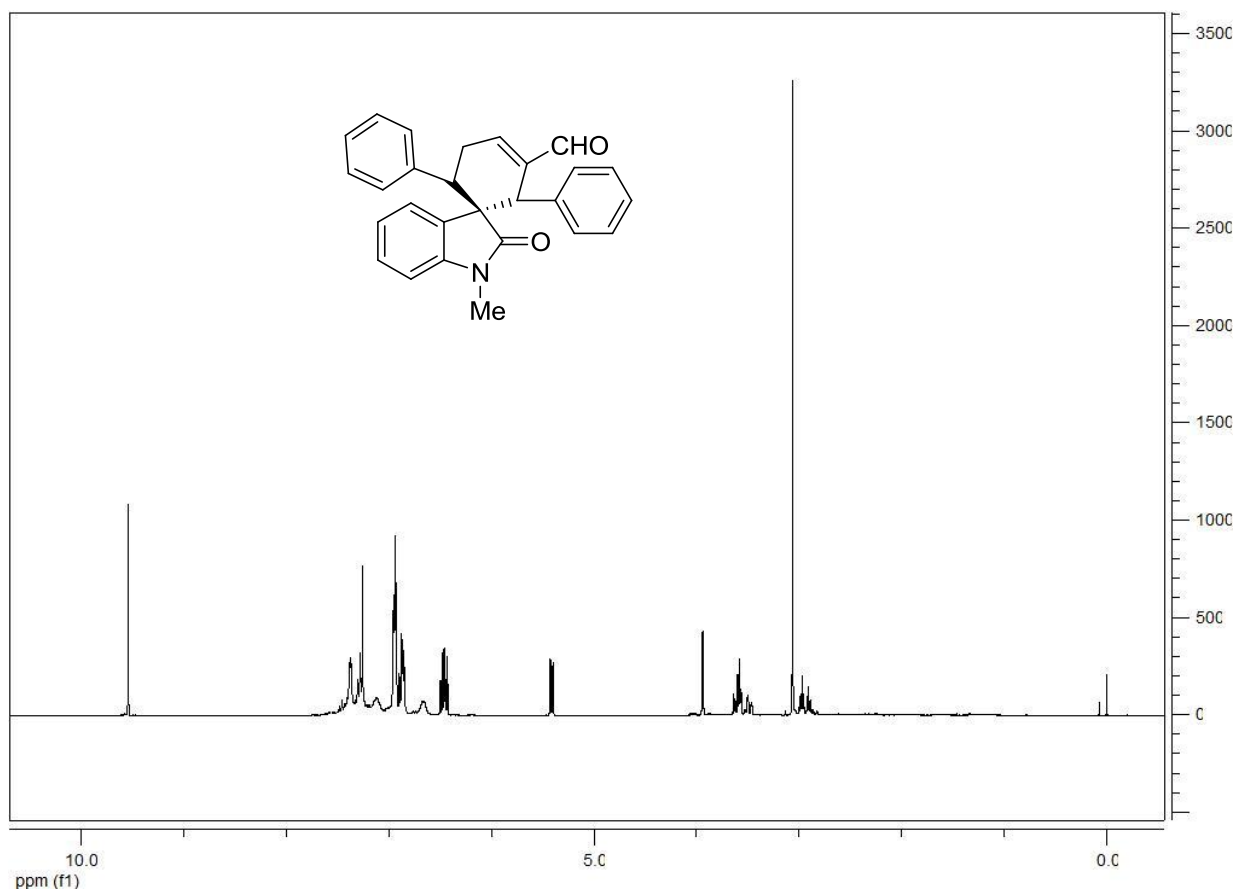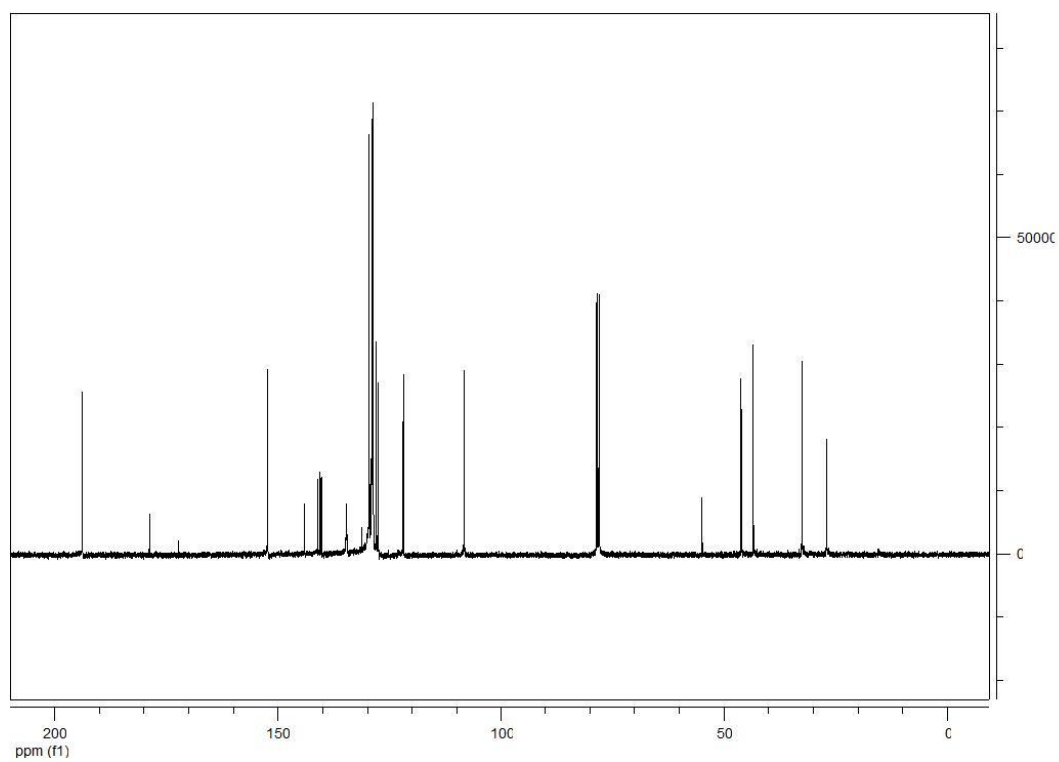

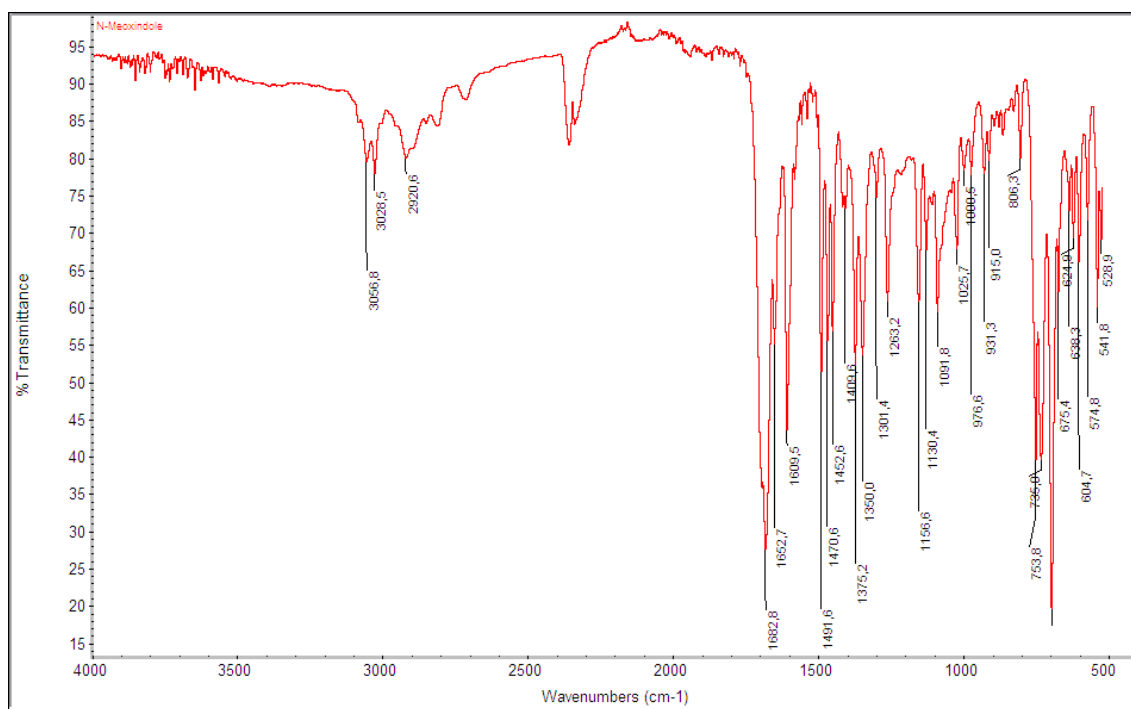

<Chromatogram>

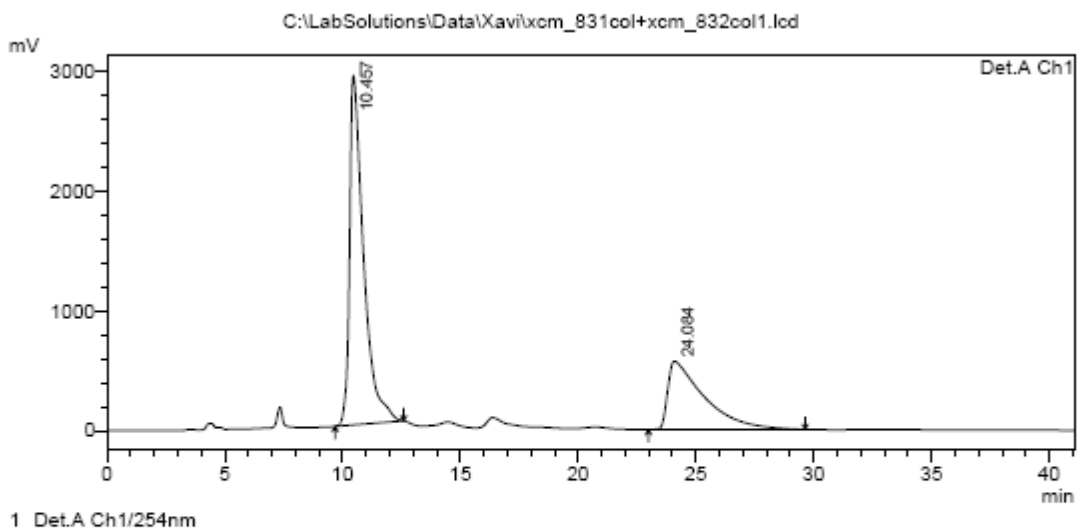

PeakTable

| Peak# | Ret. Time | Area      | Height  | Area %  | Height % |
|-------|-----------|-----------|---------|---------|----------|
| 1     | 10.457    | 120530801 | 2915321 | 66.408  | 83.648   |
| 2     | 24.084    | 60968330  | 569910  | 33.592  | 16.352   |
| Total |           | 181499131 | 3485231 | 100.000 | 100.000  |

<Chromatogram>

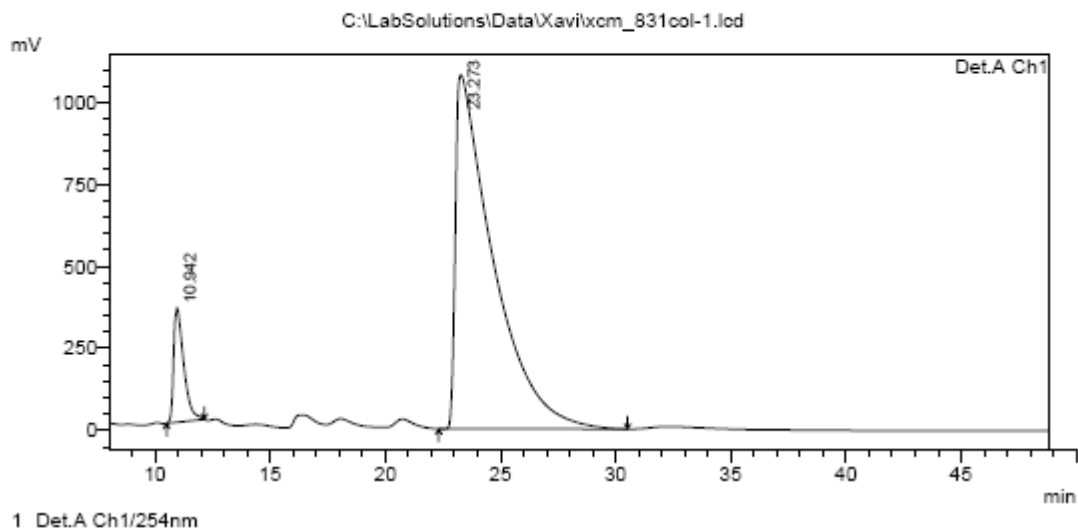

PeakTable

| Peak# | Ret. Time | Area      | Height  | Area %  | Height % |
|-------|-----------|-----------|---------|---------|----------|
| 1     | 10.942    | 10672332  | 348866  | 8.033   | 24.440   |
| 2     | 23.273    | 122189074 | 1078564 | 91.967  | 75.560   |
| Total |           | 132861406 | 1427430 | 100.000 | 100.000  |

3h

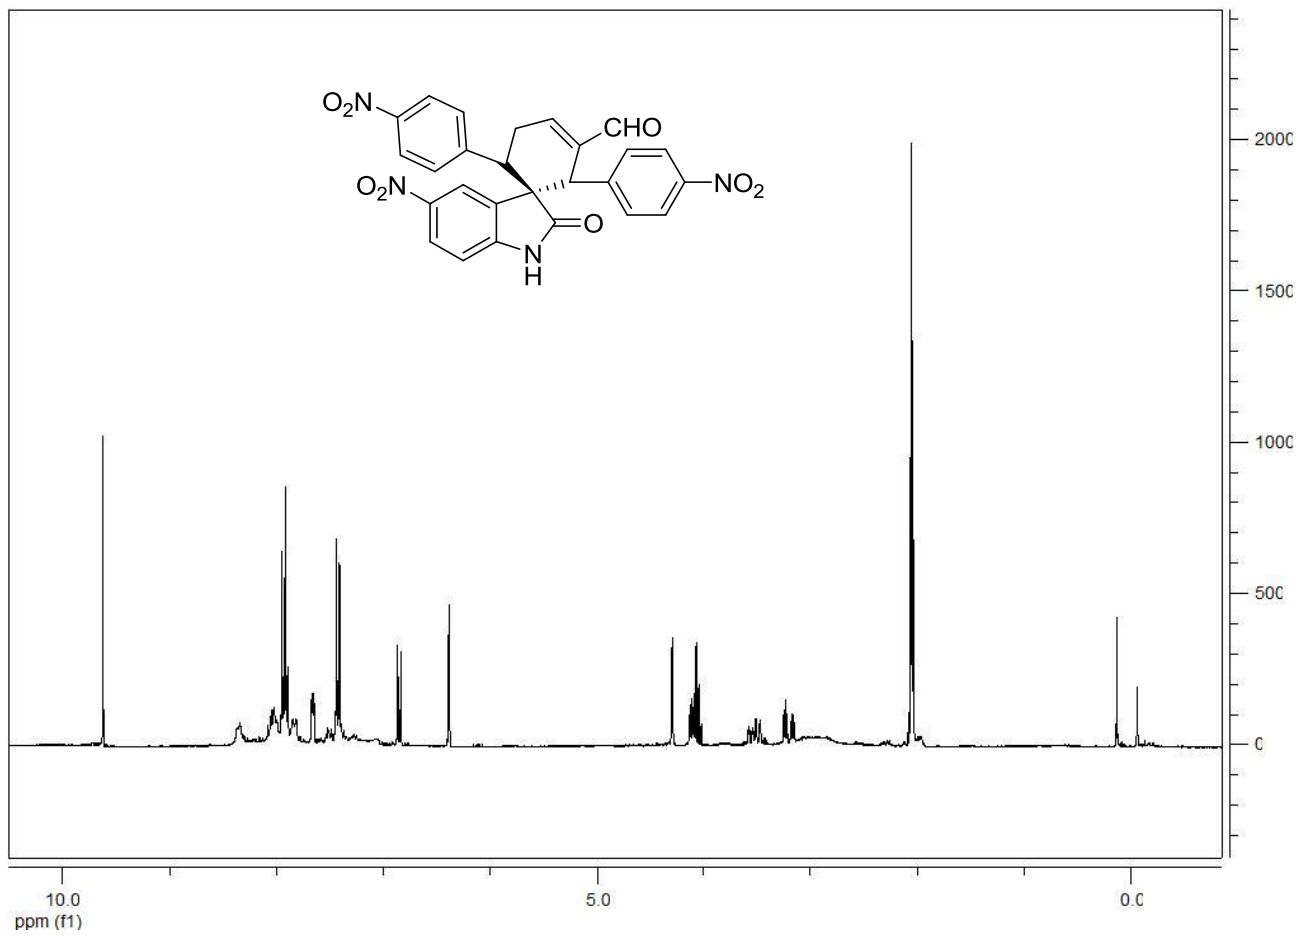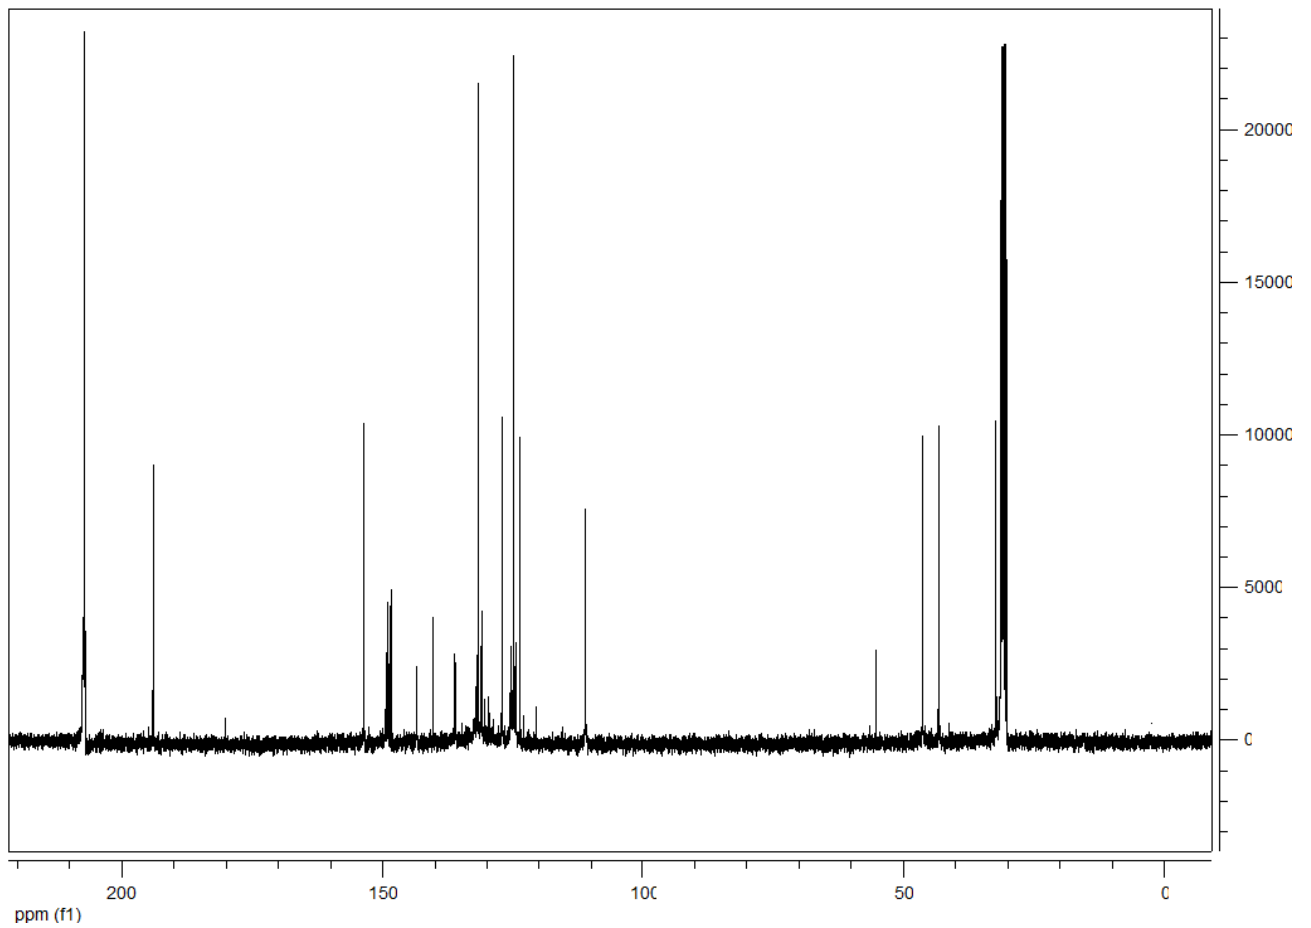

<Chromatogram>

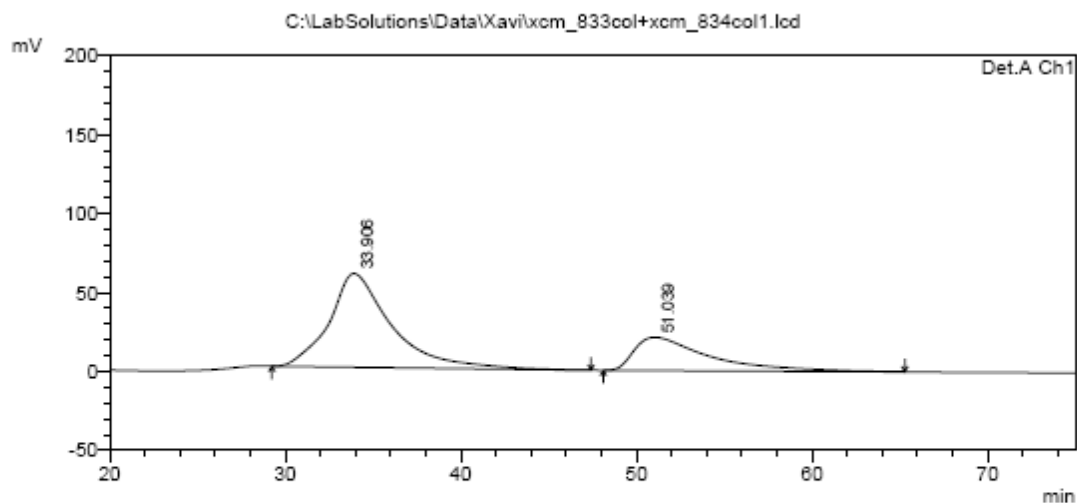

PeakTable

| Peak# | Ret. Time | Area     | Height | Area %  | Height % |
|-------|-----------|----------|--------|---------|----------|
| 1     | 33.906    | 14608385 | 59355  | 70.293  | 73.777   |
| 2     | 51.039    | 6173604  | 21097  | 29.707  | 26.223   |
| Total |           | 20781988 | 80452  | 100.000 | 100.000  |

<Chromatogram>

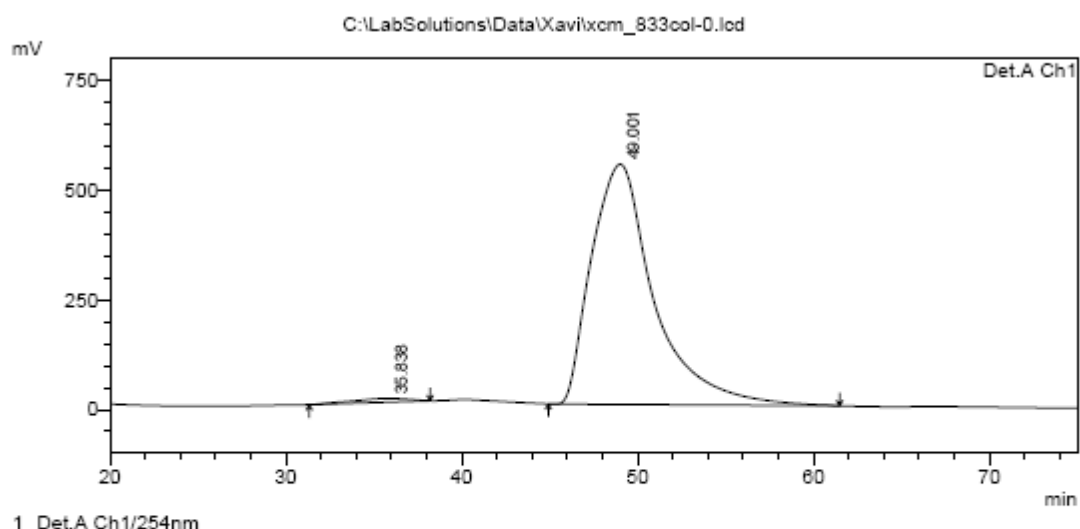

PeakTable

| Peak# | Ret. Time | Area      | Height | Area %  | Height % |
|-------|-----------|-----------|--------|---------|----------|
| 1     | 35.838    | 1885852   | 8402   | 1.374   | 1.510    |
| 2     | 49.001    | 135396829 | 547849 | 98.626  | 98.490   |
| Total |           | 137282681 | 556251 | 100.000 | 100.000  |



5a

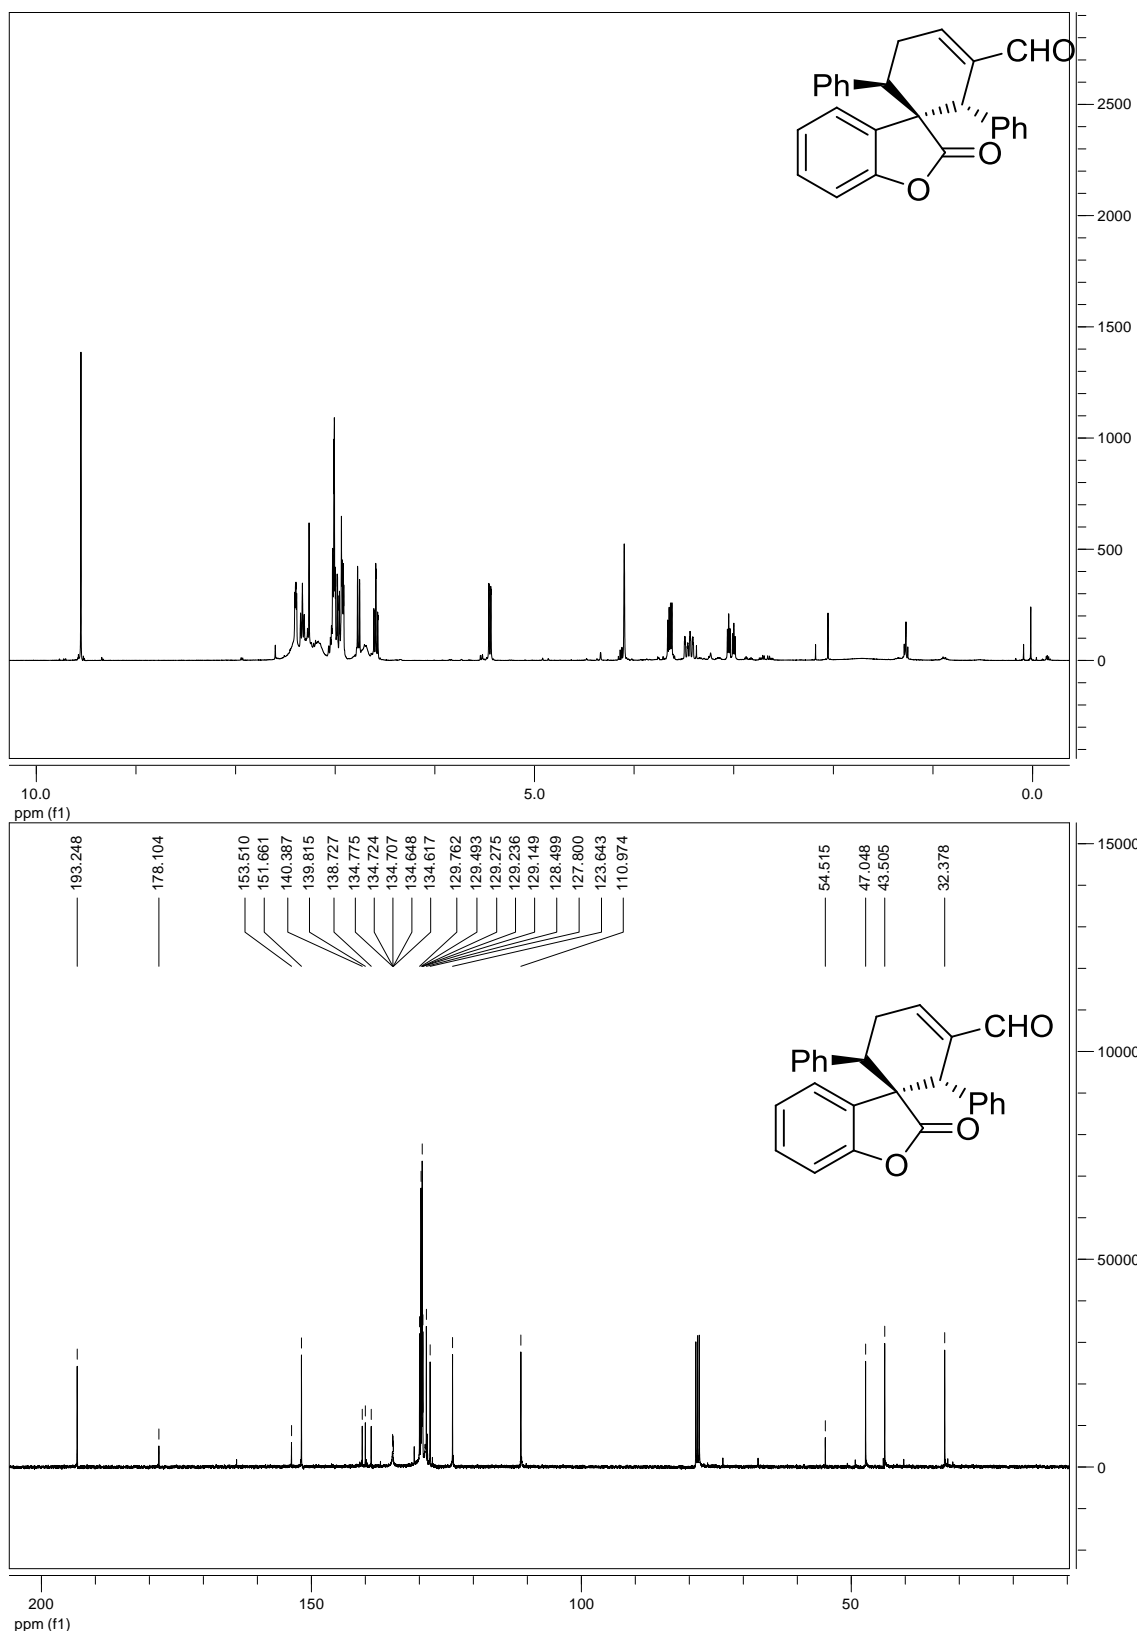

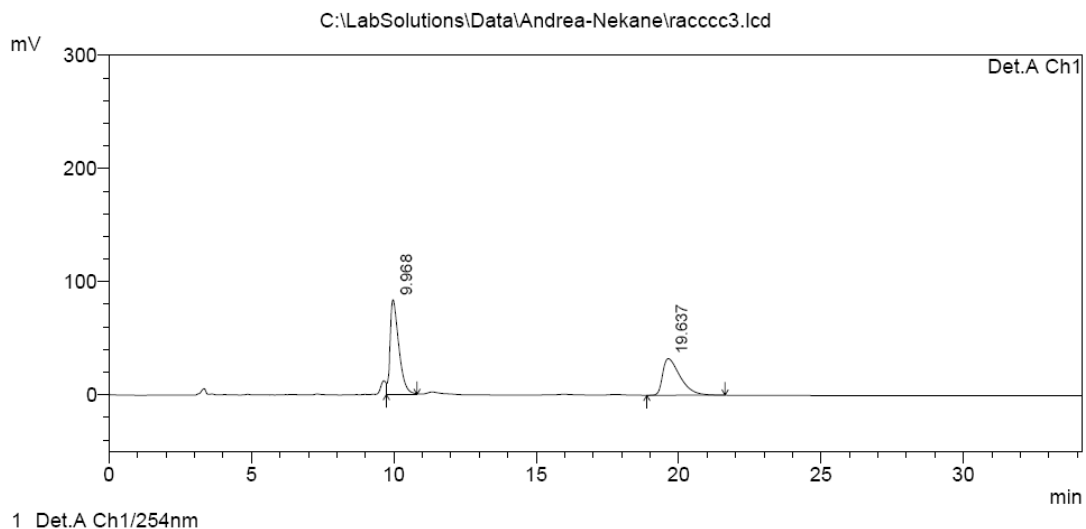

PeakTable

Detector A Ch1 254nm

| Peak# | Ret. Time | Area    | Height | Area %  | Height % |
|-------|-----------|---------|--------|---------|----------|
| 1     | 9.968     | 1789216 | 83822  | 56.520  | 72.169   |
| 2     | 19.637    | 1376394 | 32325  | 43.480  | 27.831   |
| Total |           | 3165610 | 116147 | 100.000 | 100.000  |

Cat-(R)

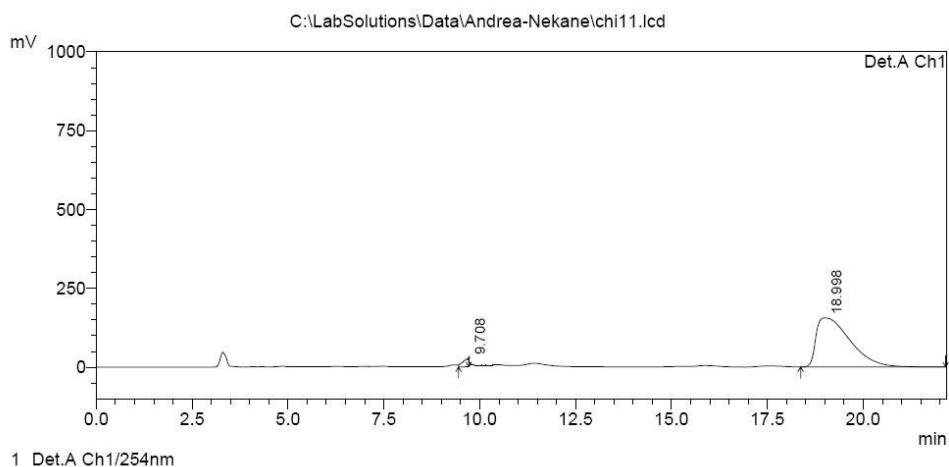

PeakTable

Detector A Ch1 254nm

| Peak# | Ret. Time | Area    | Height | Area %  | Height % |
|-------|-----------|---------|--------|---------|----------|
| 1     | 9.708     | 285600  | 27120  | 2.886   | 14.842   |
| 2     | 18.998    | 9608879 | 155611 | 97.114  | 85.158   |
| Total |           | 9894478 | 182731 | 100.000 | 100.000  |

Cat-(S)

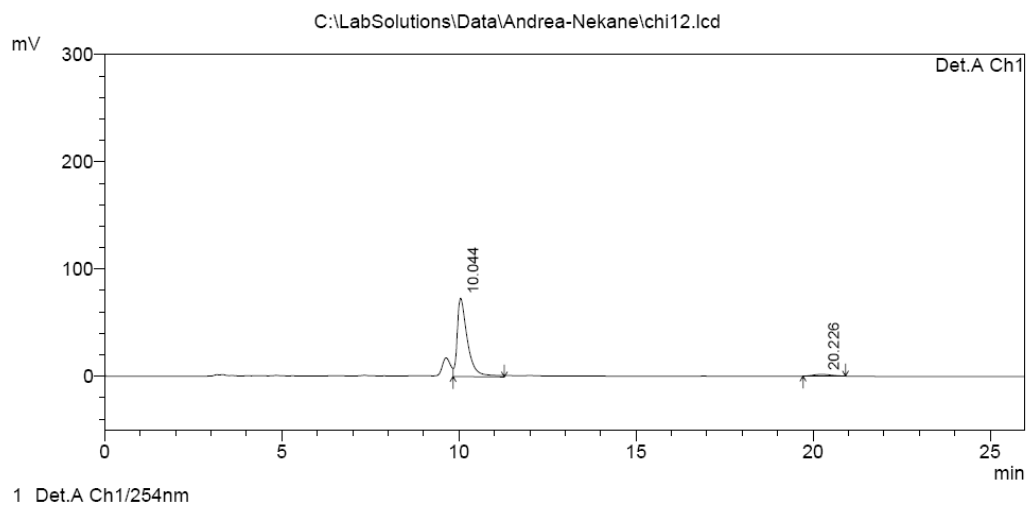

PeakTable

| Peak# | Ret. Time | Area    | Height | Area %  | Height % |
|-------|-----------|---------|--------|---------|----------|
| 1     | 10.044    | 1470255 | 73113  | 96.362  | 97.846   |
| 2     | 20.226    | 55514   | 1609   | 3.638   | 2.154    |
| Total |           | 1525769 | 74722  | 100.000 | 100.000  |

6a

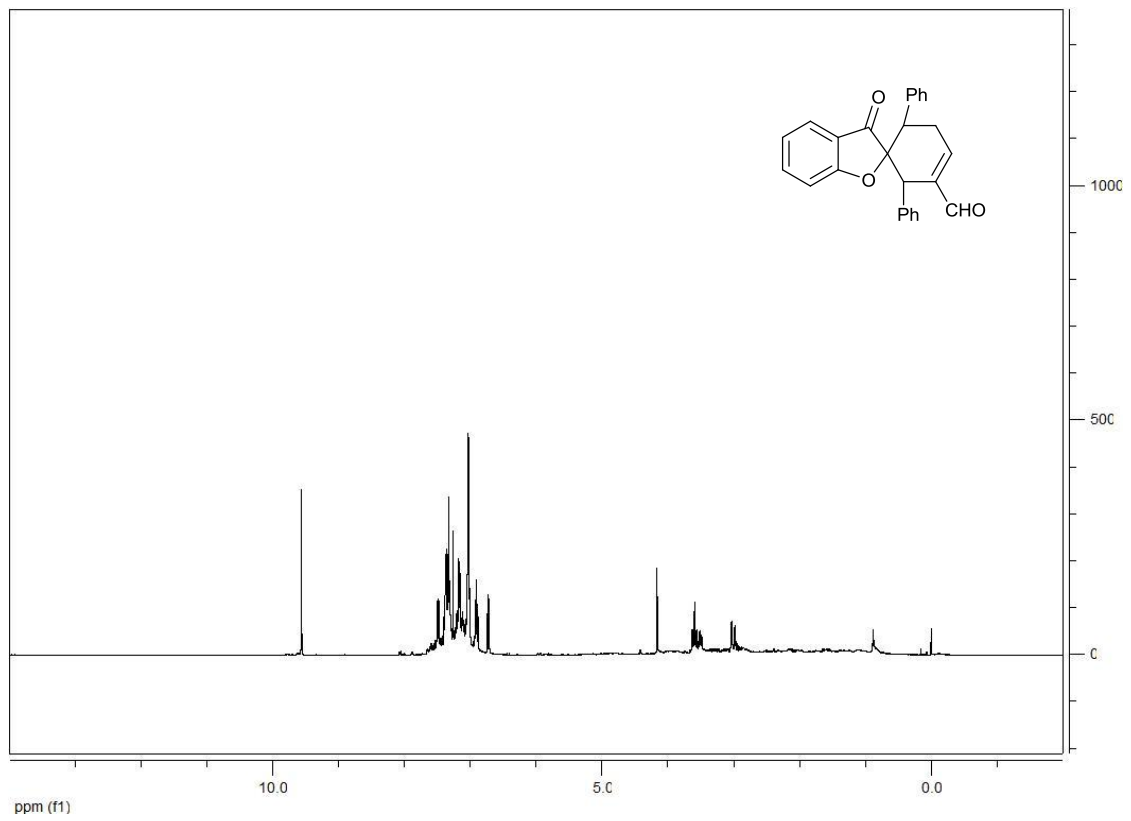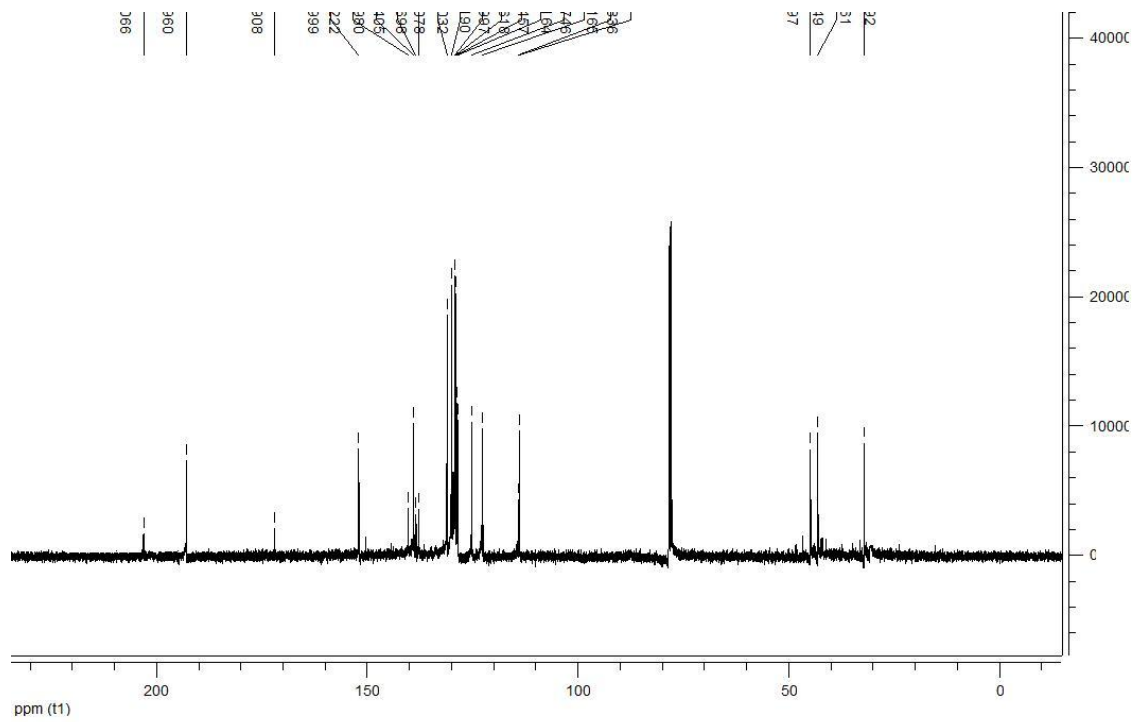

IR

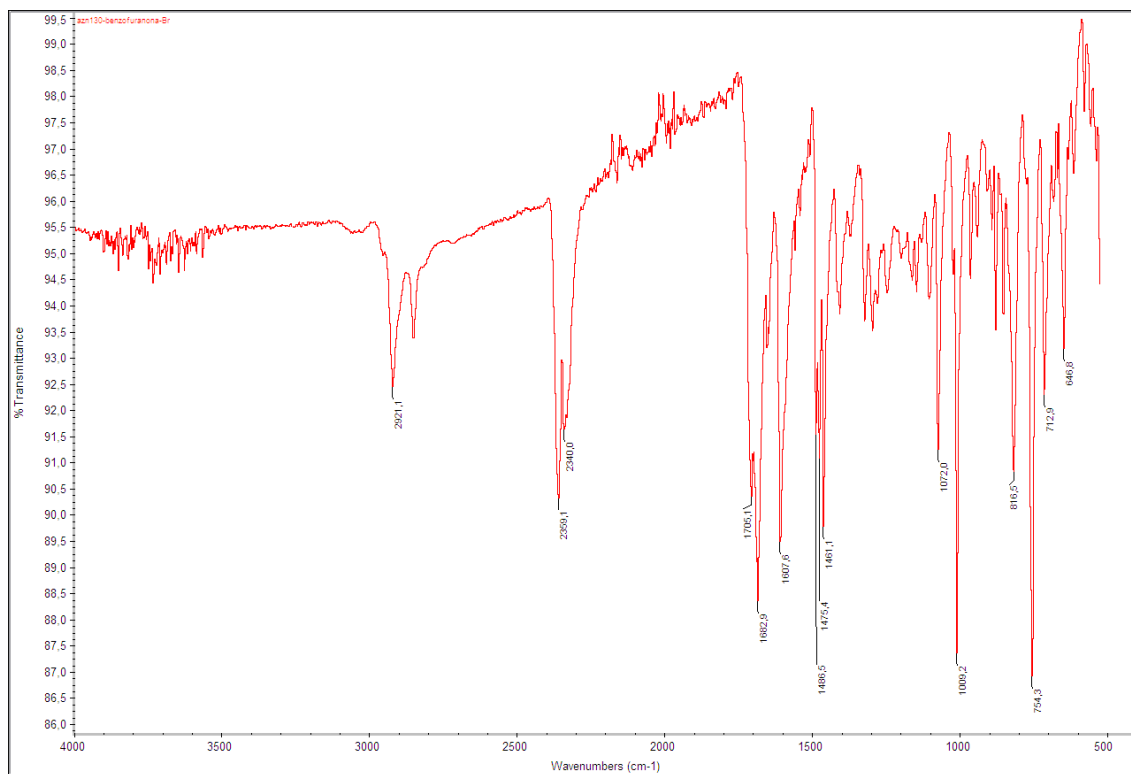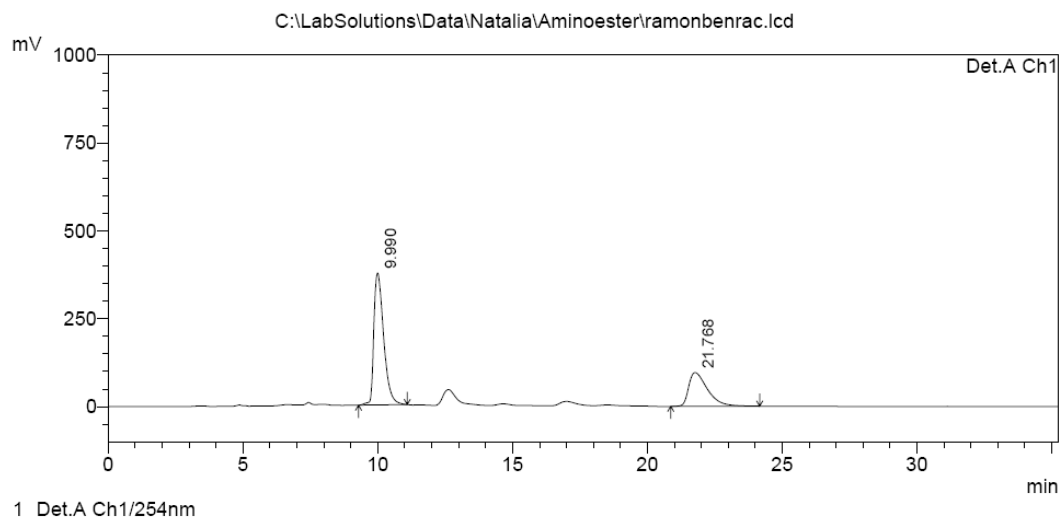

1 Det.A Ch1/254nm

PeakTable

| Peak# | Ret. Time | Area     | Height | Area %  | Height % |
|-------|-----------|----------|--------|---------|----------|
| 1     | 9.990     | 9511135  | 375462 | 67.307  | 79.674   |
| 2     | 21.768    | 4619752  | 95787  | 32.693  | 20.326   |
| Total |           | 14130887 | 471249 | 100.000 | 100.000  |

Cat-(S)

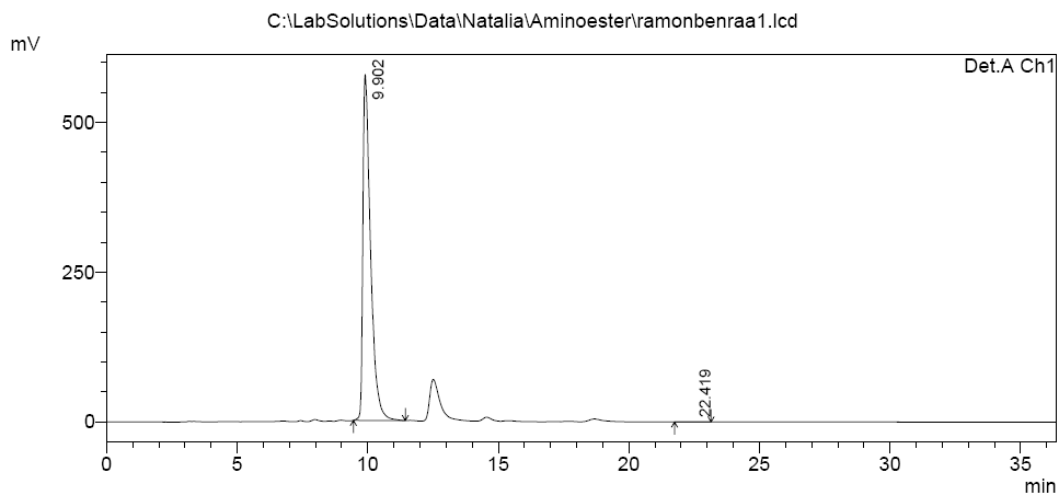

PeakTable

| Peak# | Ret. Time | Area     | Height | Area %  | Height % |
|-------|-----------|----------|--------|---------|----------|
| 1     | 9.902     | 11832269 | 577383 | 99.921  | 99.961   |
| 2     | 22.419    | 9385     | 227    | 0.079   | 0.039    |
| Total |           | 11841654 | 577610 | 100.000 | 100.000  |

Cat-(R)

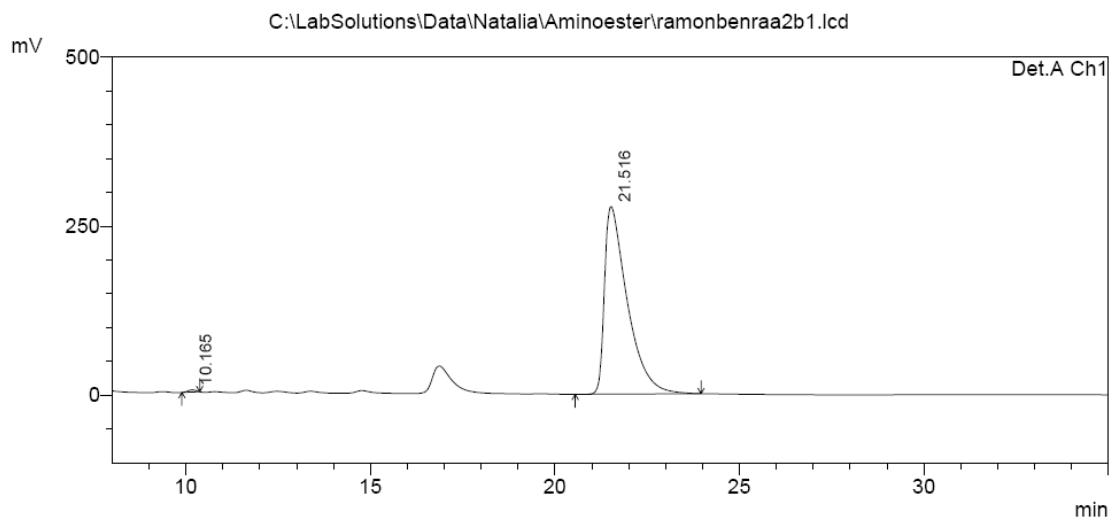

PeakTable

| Peak# | Ret. Time | Area     | Height | Area %  | Height % |
|-------|-----------|----------|--------|---------|----------|
| 1     | 10.165    | 48608    | 3143   | 0.405   | 1.119    |
| 2     | 21.516    | 11954456 | 277665 | 99.595  | 98.881   |
| Total |           | 12003065 | 280808 | 100.000 | 100.000  |

7a

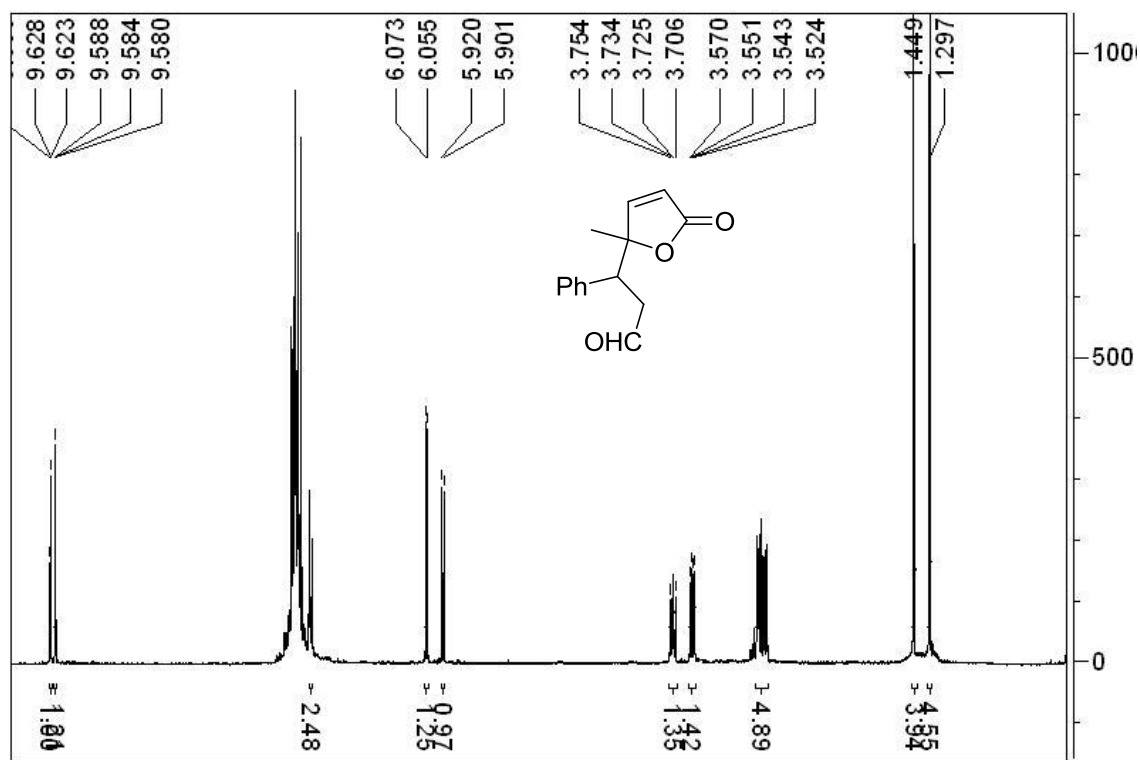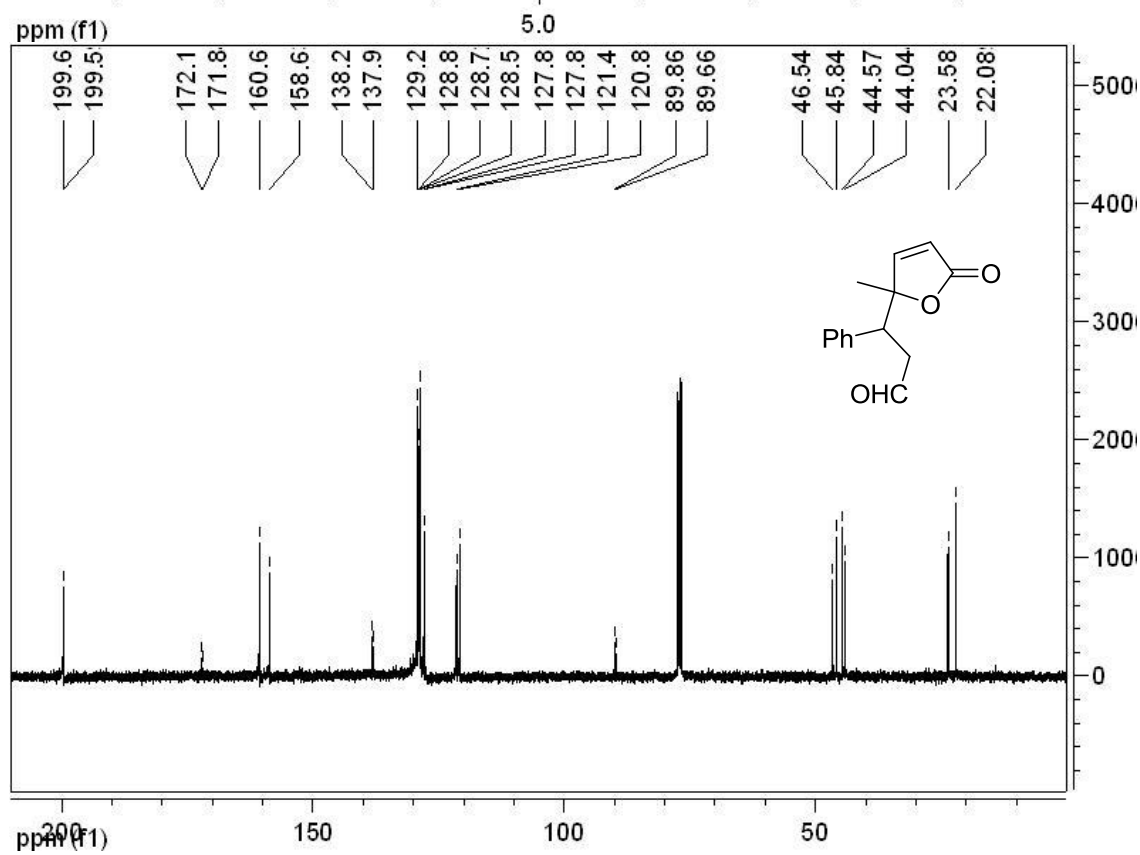

**8a'**  
**<sup>1</sup>H NMR**

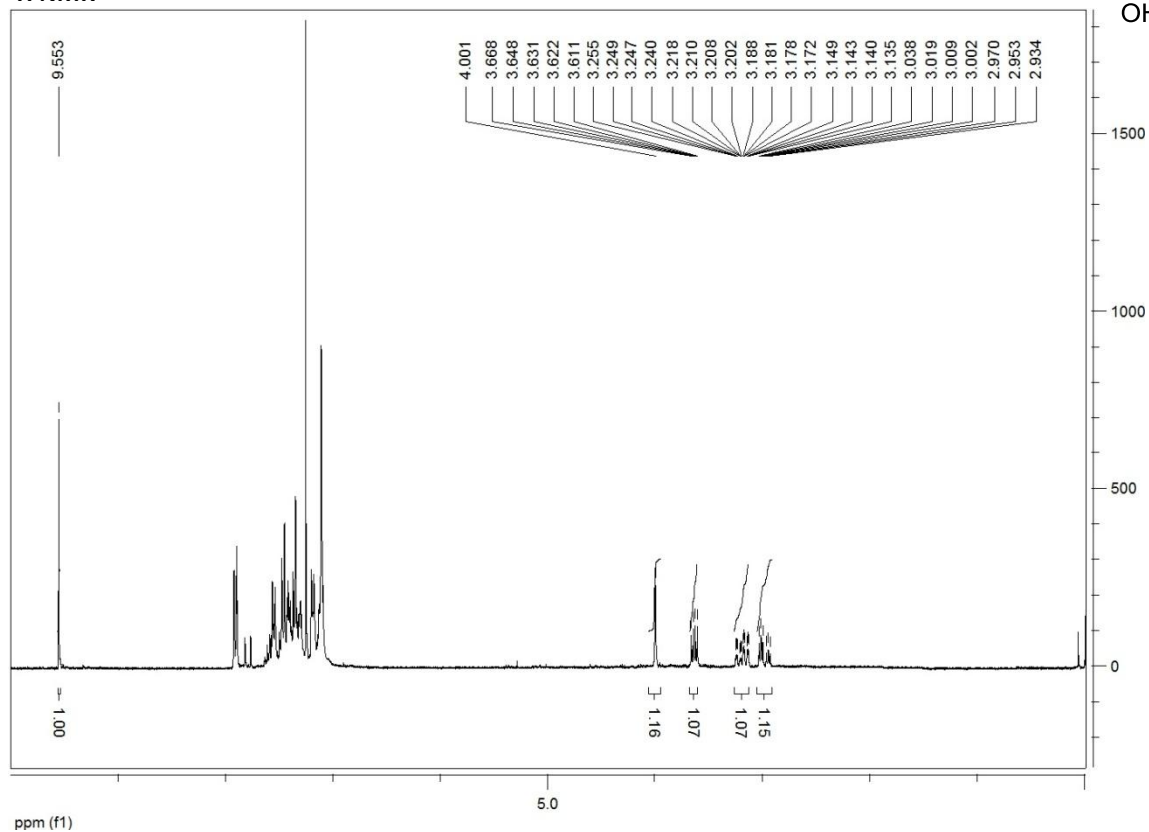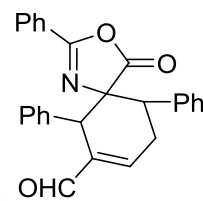

**<sup>13</sup>C NMR**



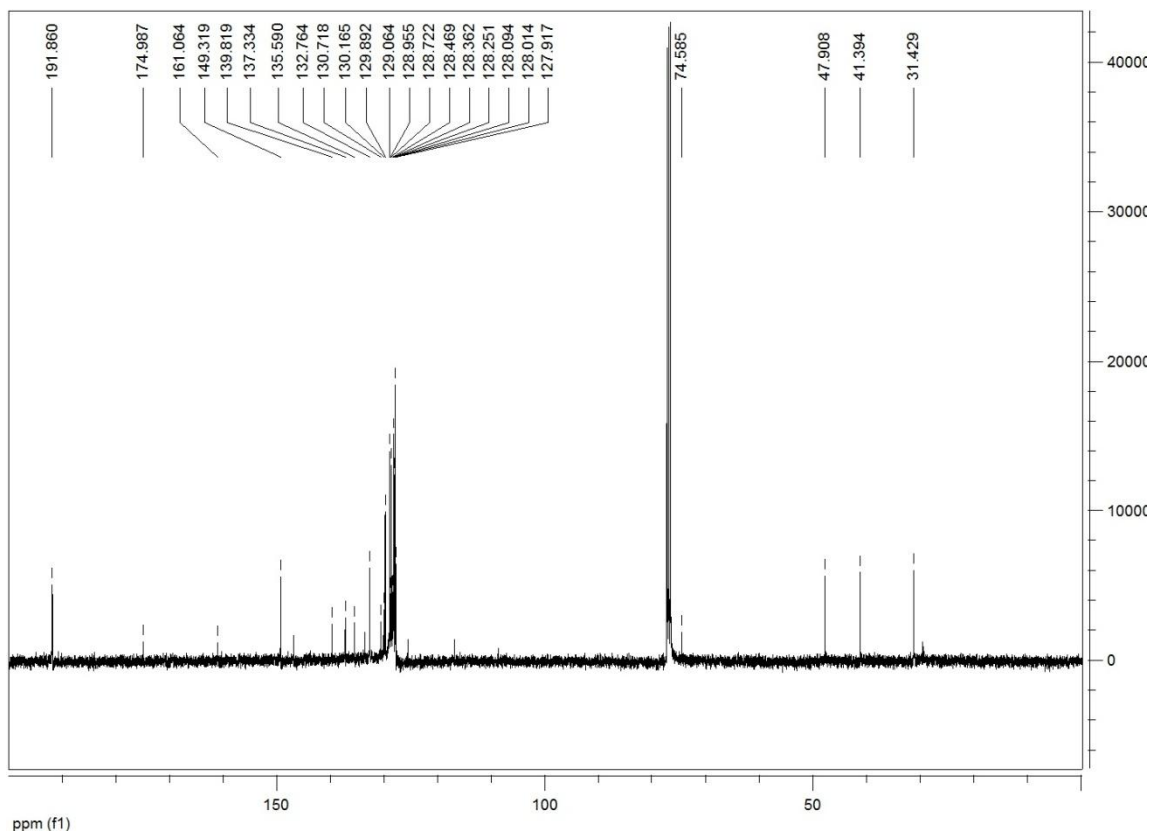

IR

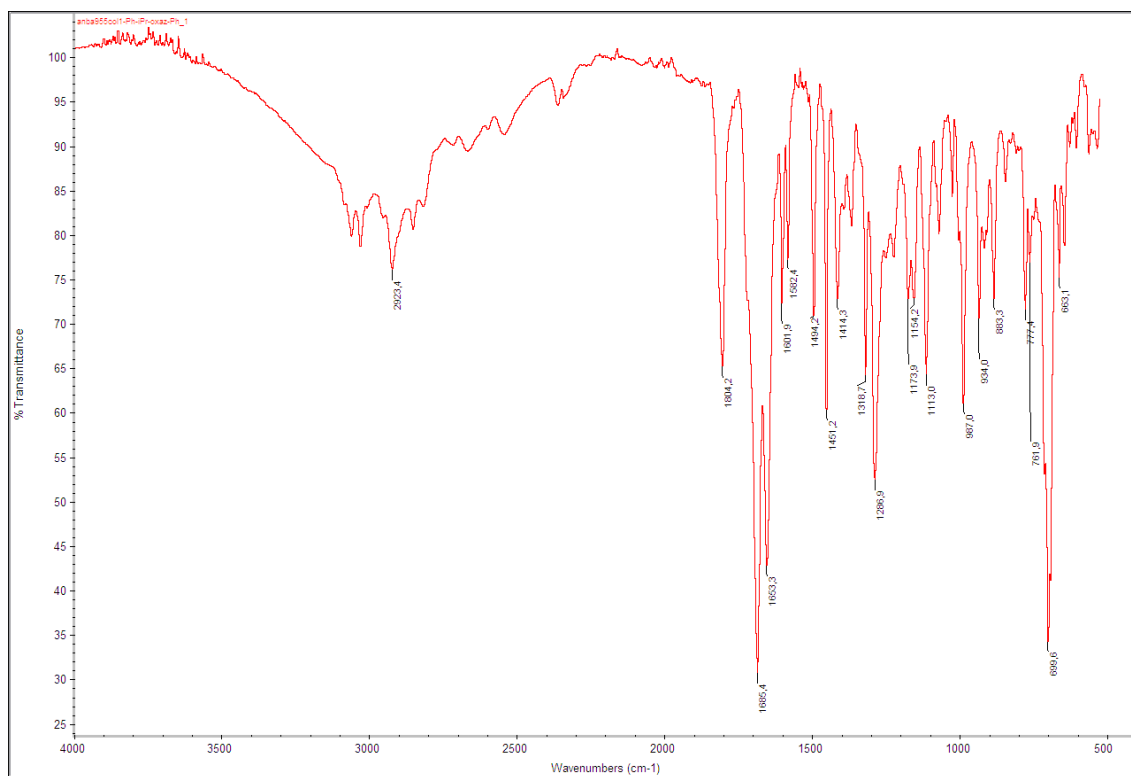

HPLC

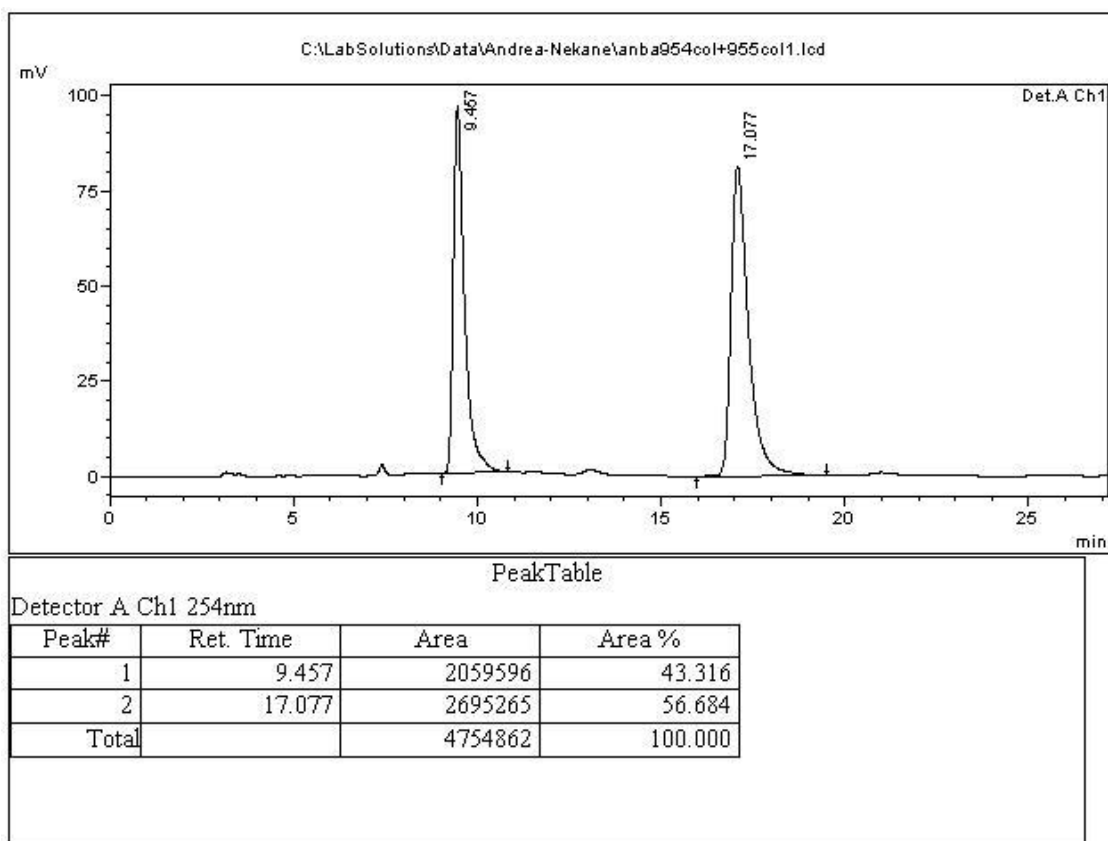

(S)-Cat

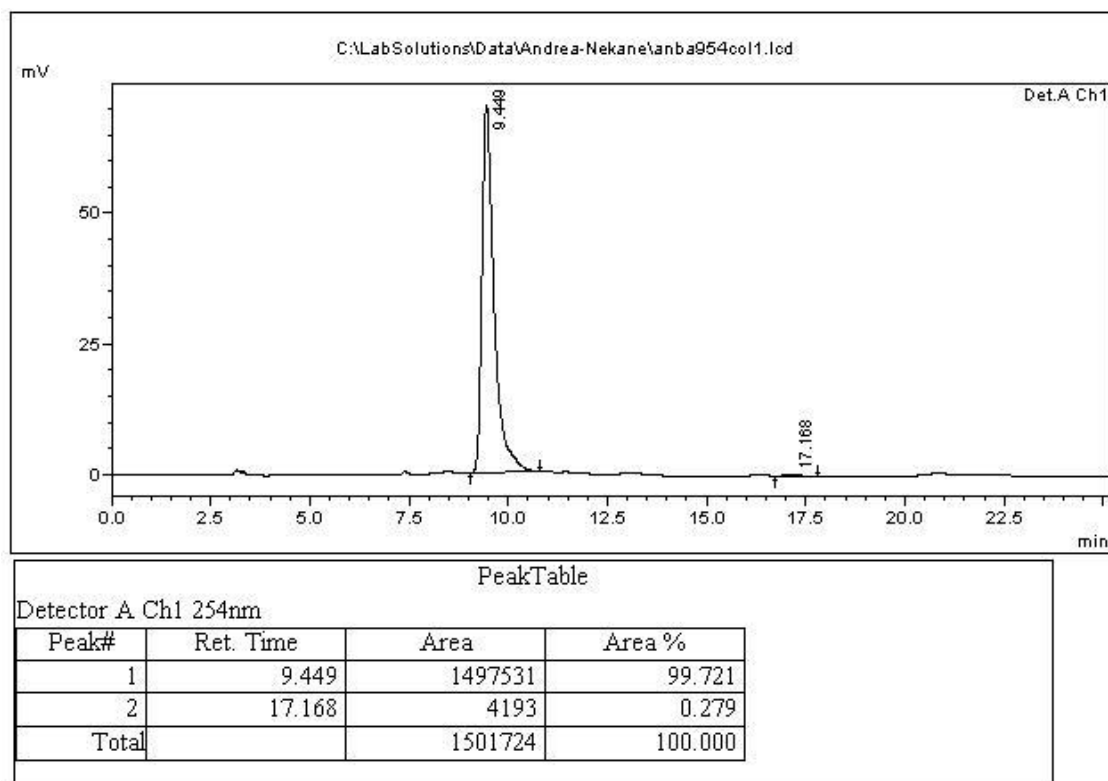

(R)-Cat

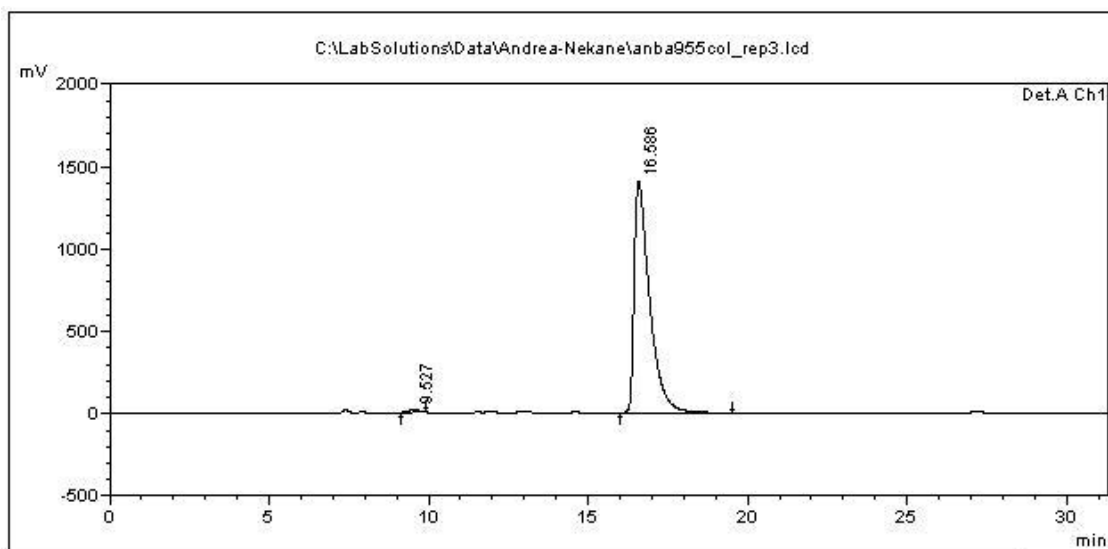

PeakTable

Detector A Ch1 254nm

| Peak# | Ret. Time | Area     | Area %  |
|-------|-----------|----------|---------|
| 1     | 9.527     | 386308   | 0.806   |
| 2     | 16.586    | 47526269 | 99.194  |
| Total |           | 47912577 | 100.000 |

8a

<sup>1</sup>H NMR

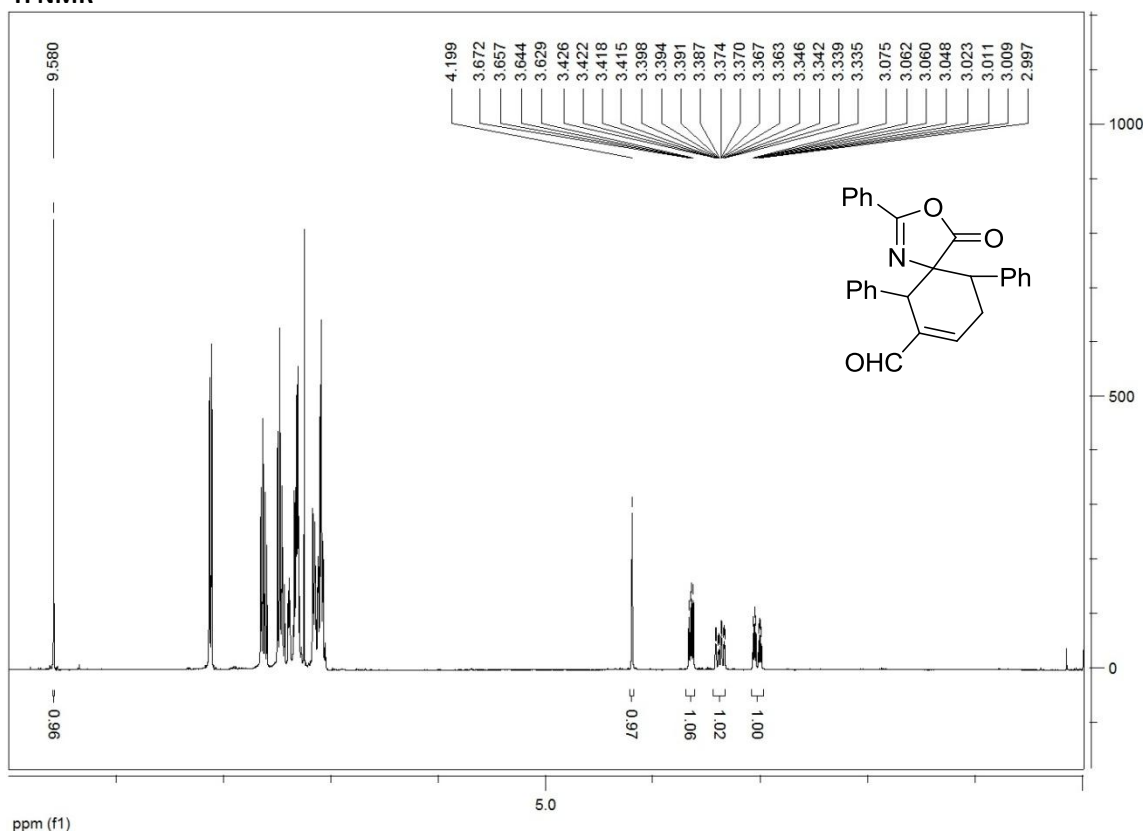

<sup>13</sup>C NMR

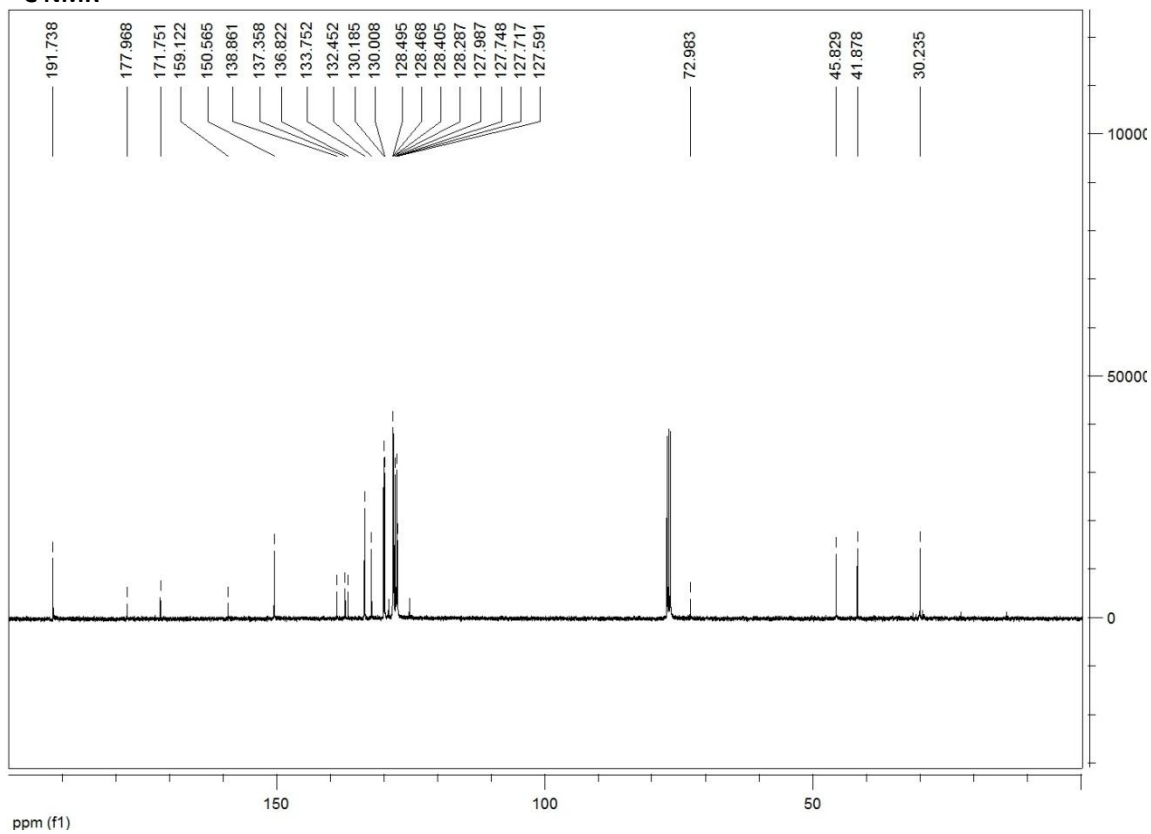

IR

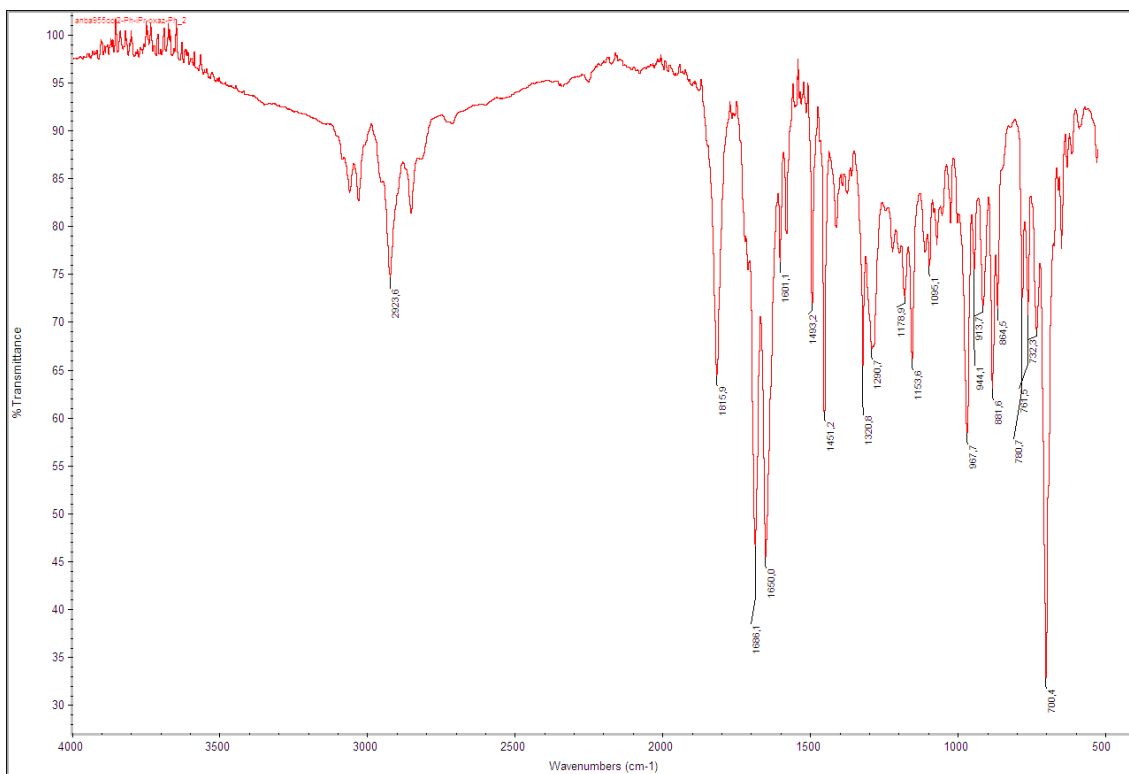

HPLC

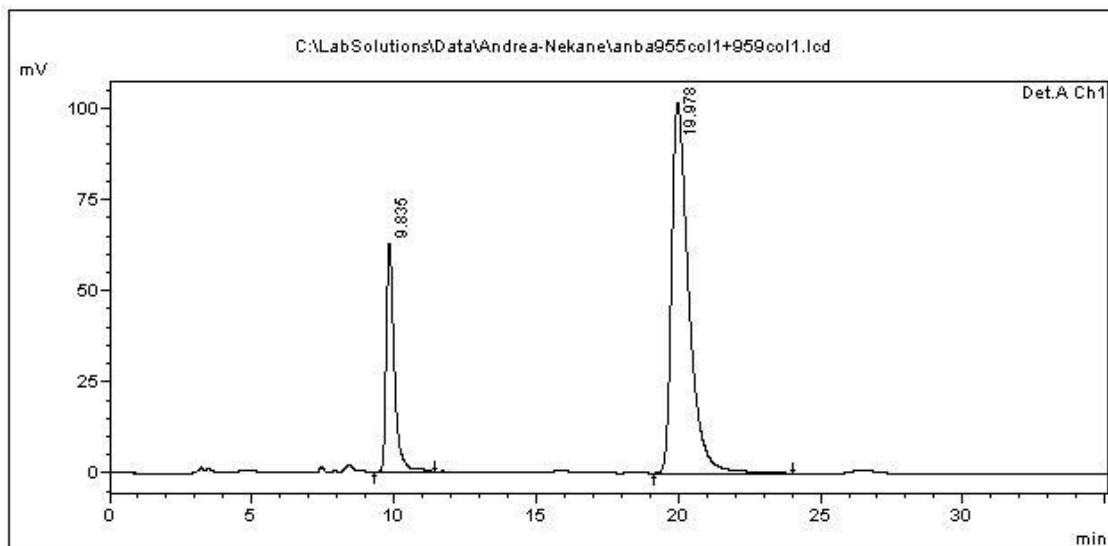

PeakTable

| Peak# | Ret. Time | Area    | Height | Area %  | Height % |
|-------|-----------|---------|--------|---------|----------|
| 1     | 9.835     | 1258091 | 62832  | 22.869  | 38.242   |
| 2     | 19.978    | 4243267 | 101471 | 77.131  | 61.758   |
| Total |           | 5501358 | 164303 | 100.000 | 100.000  |

(S)-Cat.

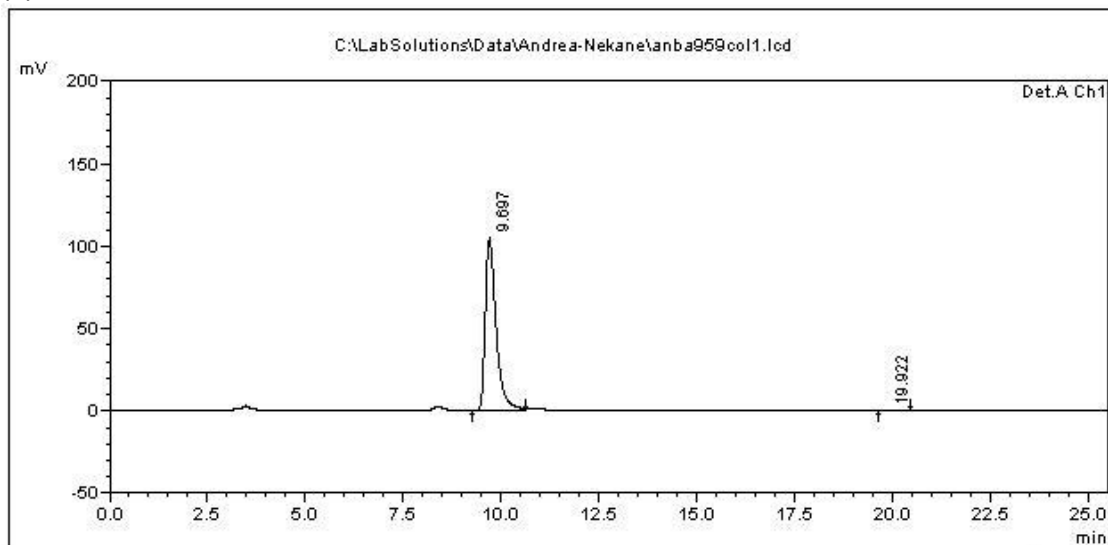

PeakTable

Detector A Ch1 254nm

| Peak# | Ret. Time | Area    | Area %  |
|-------|-----------|---------|---------|
| 1     | 9.697     | 2032355 | 99.915  |
| 2     | 19.922    | 1721    | 0.085   |
| Total |           | 2034077 | 100.000 |

(R)-Cat.

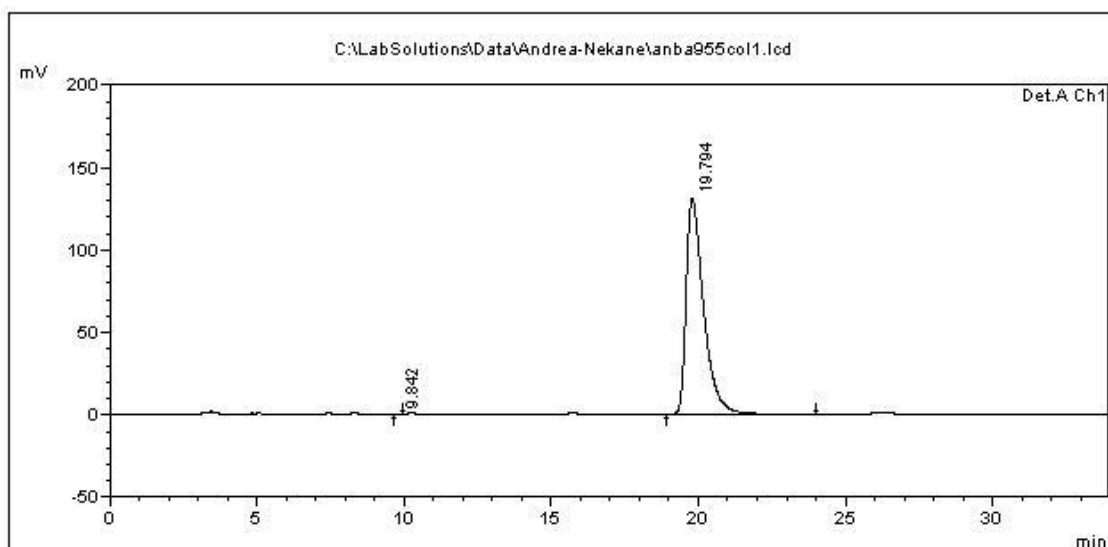

PeakTable

Detector A Ch1 254nm

| Peak# | Ret. Time | Area    | Area %  |
|-------|-----------|---------|---------|
| 1     | 9.842     | 1116    | 0.020   |
| 2     | 19.794    | 5462410 | 99.980  |
| Total |           | 5463526 | 100.000 |

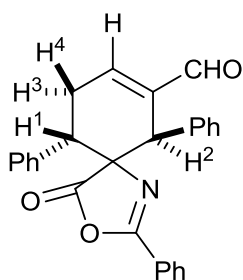

Compound **8a** (minor diastereomer):

The *trans* relative stereochemistry between the two phenyl groups was readily secured by nOe experiments. Thus, irradiation of proton 1 (vide supra) leads to an enhancement of the intensities of the aromatic signals, and of those of protons 3 and 4. Irradiation of proton 2 leads only to an enhancement of the intensities of the aromatic signals. Irradiation of proton 3 leads to an enhancement of the intensities of both the olefinic hydrogen and of the aromatic protons.

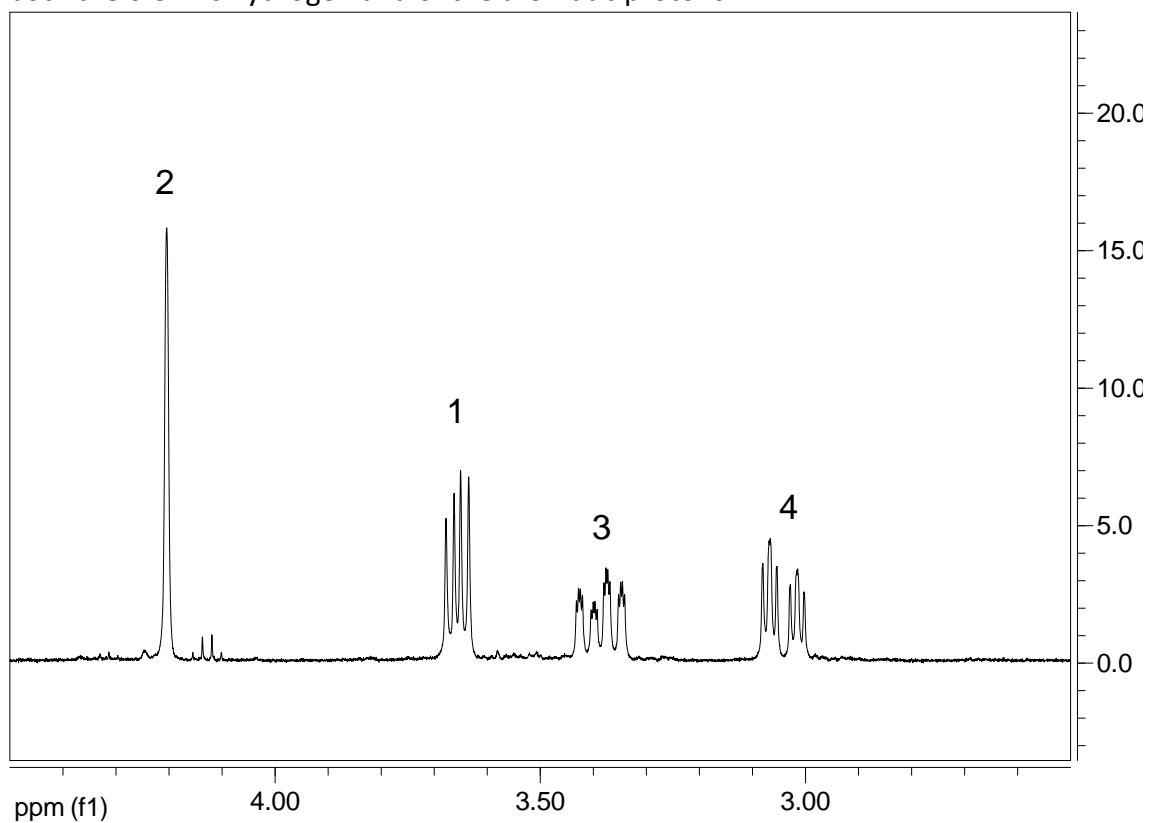



Irradiation of proton 1:

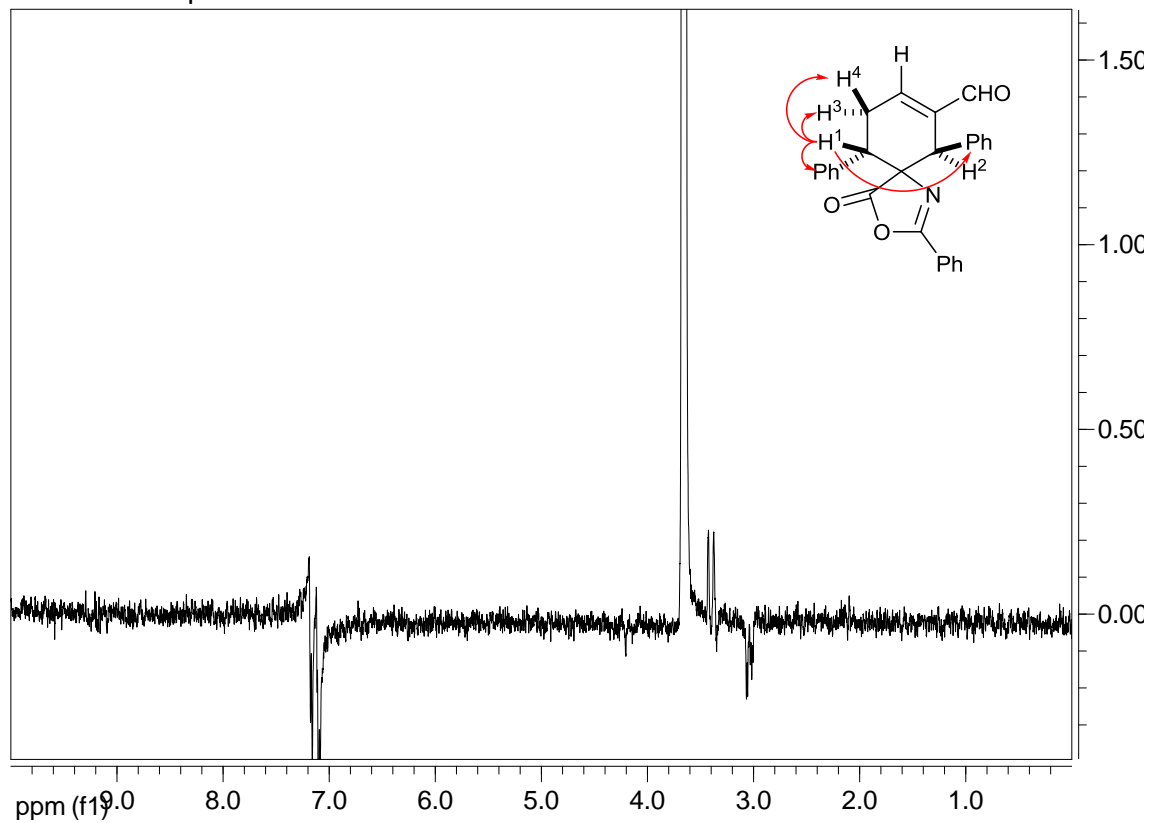

Irradiation of proton 2:

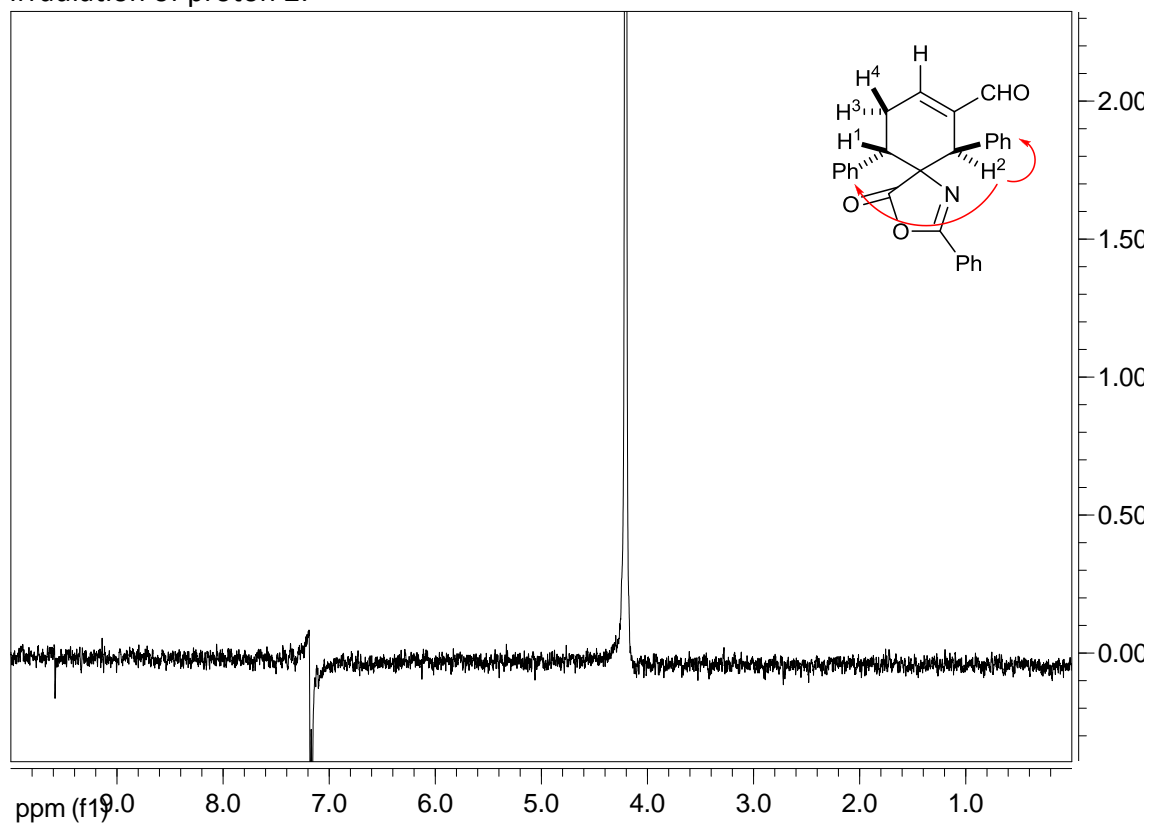

Irradiation of proton 3:

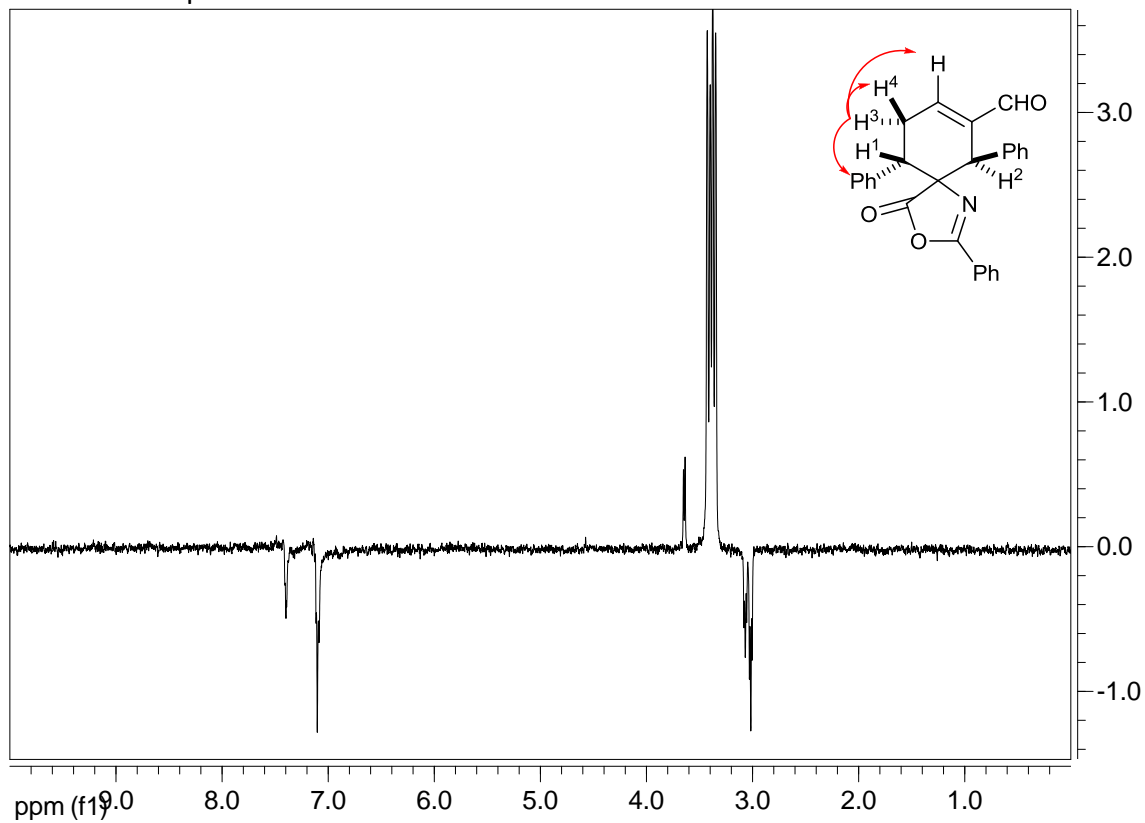

Irradiation of proton 4:

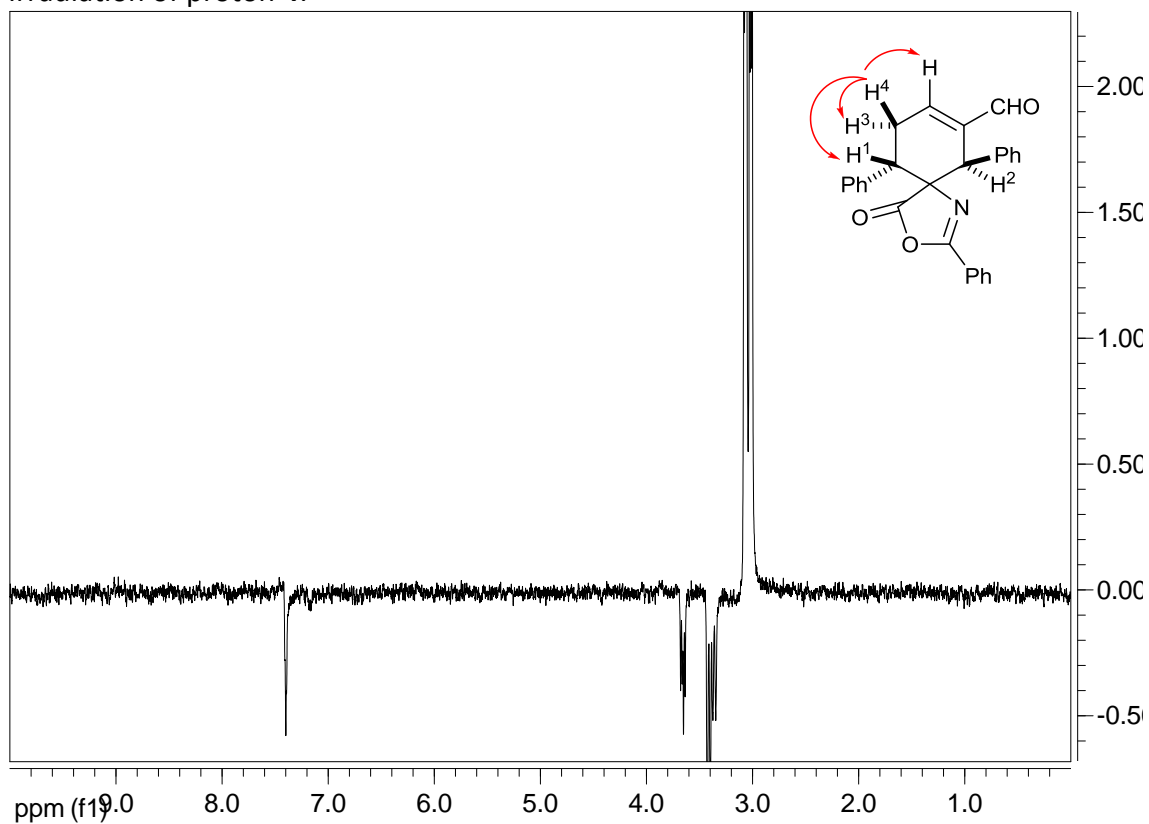

The same phenomena were observed in compound 8a (major diastereomer):

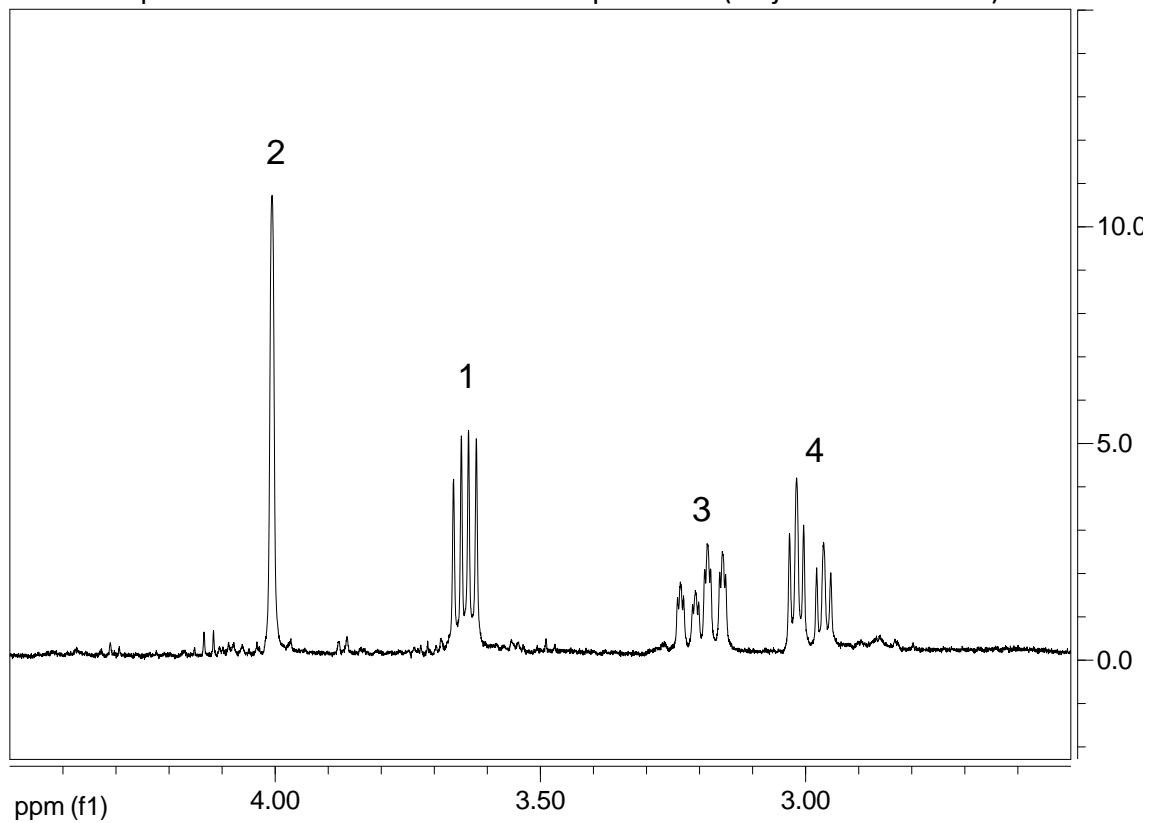

Irradiation of proton 1:

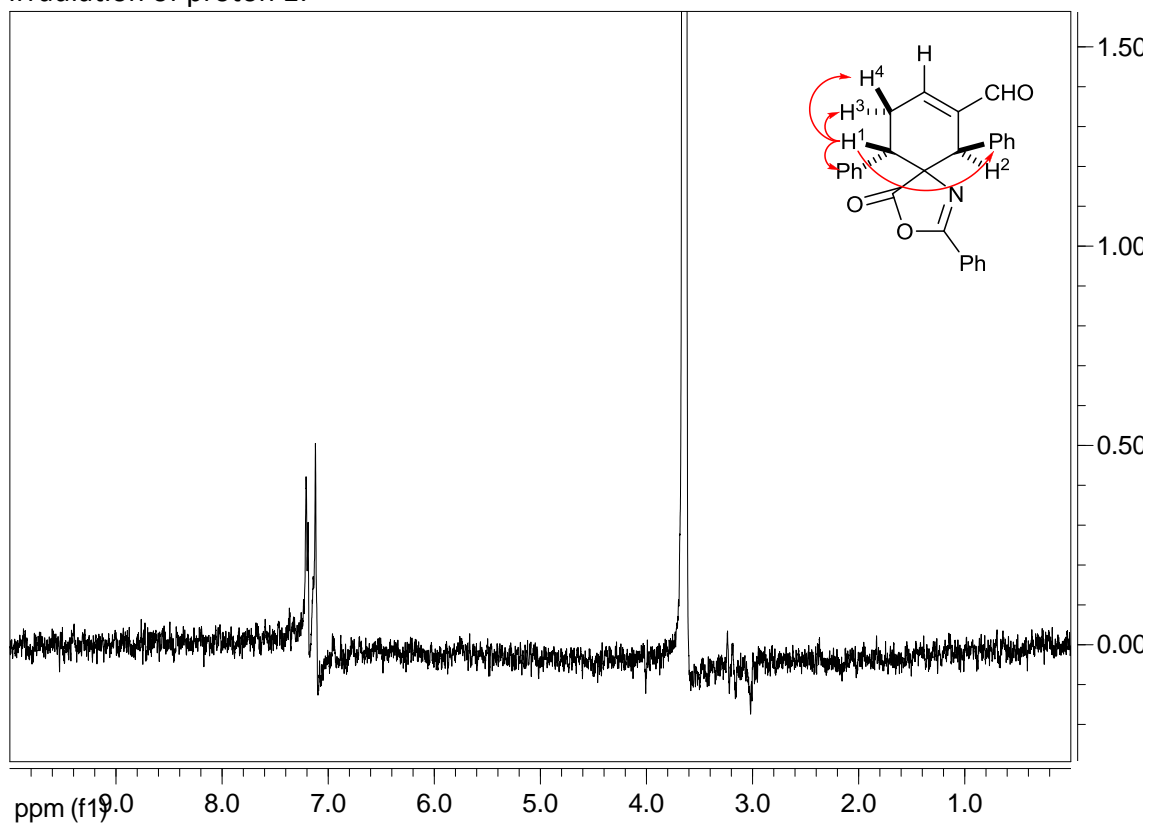

Irradiation of proton 2:

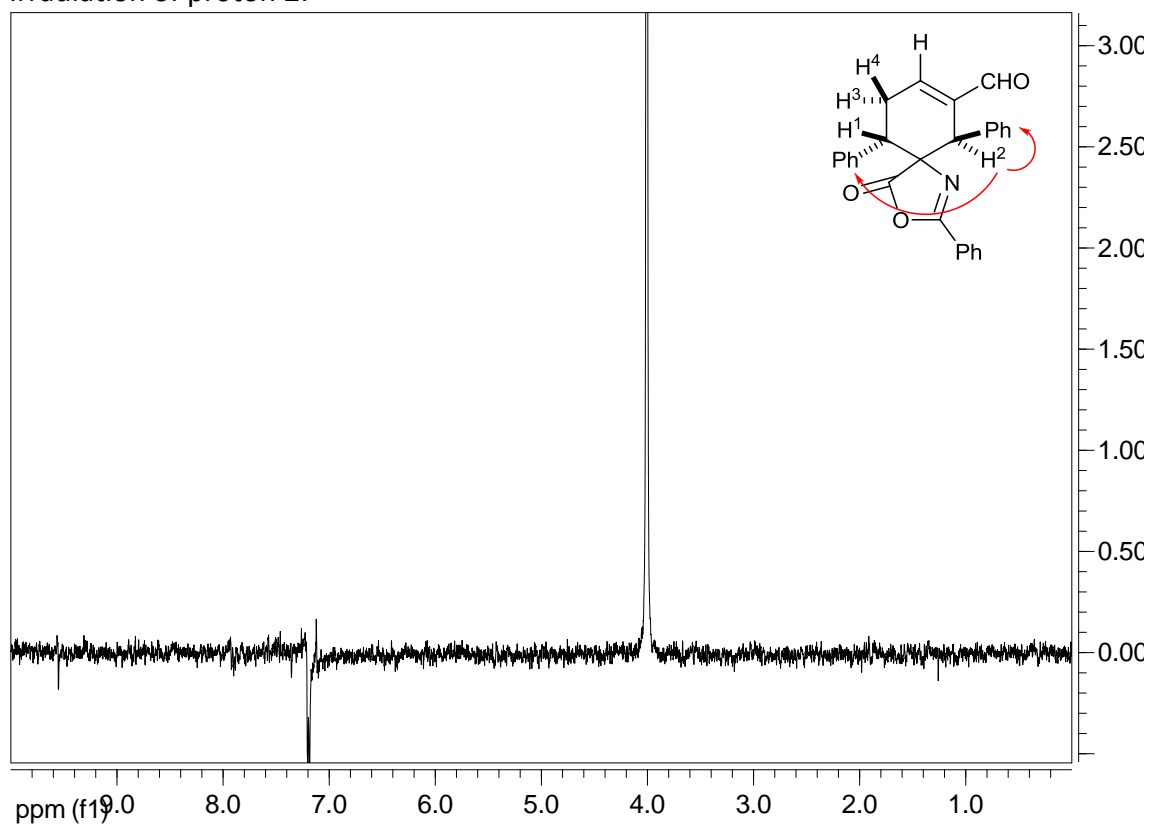

Irradiation of proton 3:

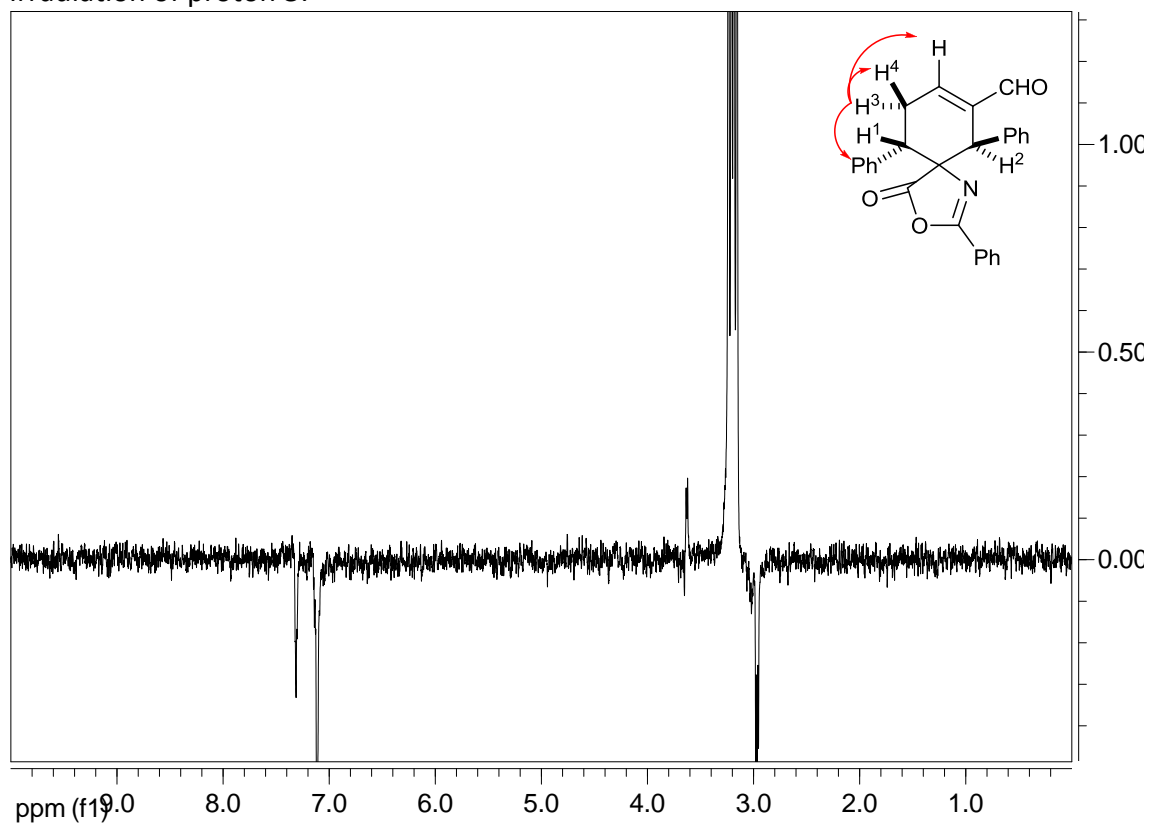

Irradiation of proton 4:

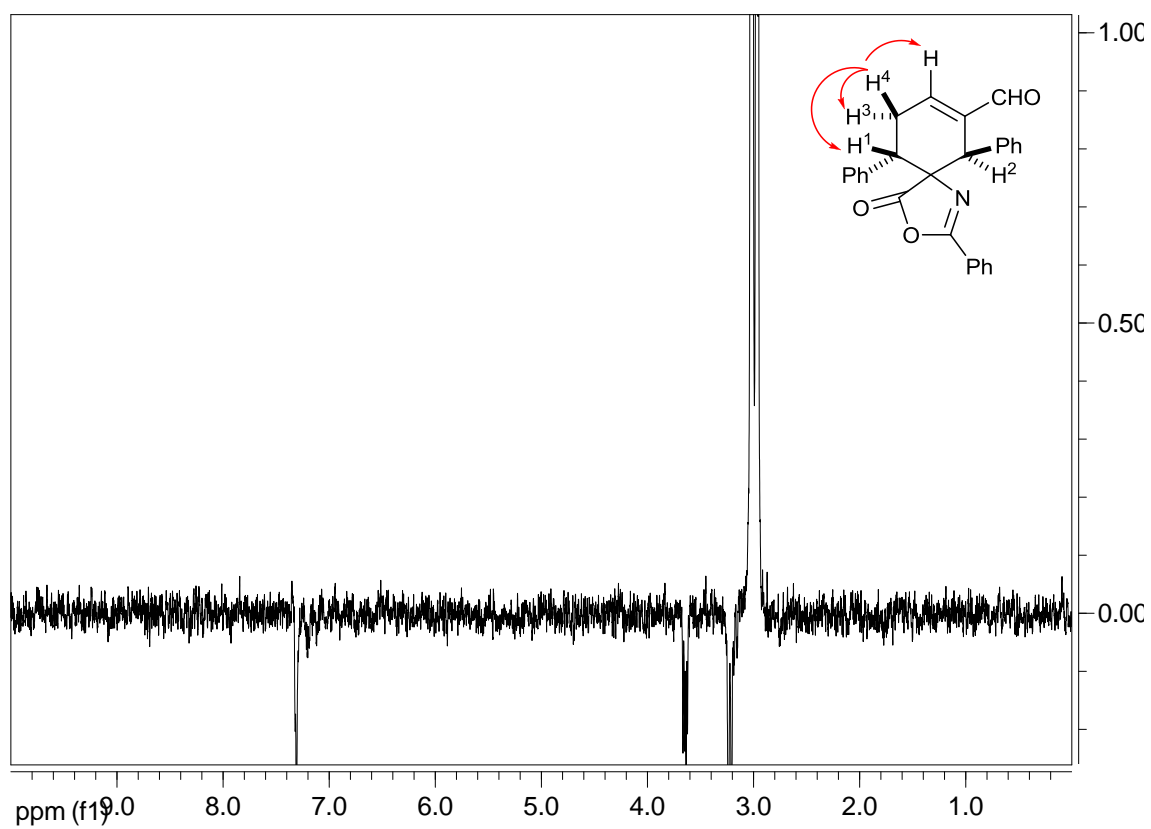

4a

<sup>1</sup>H NMR

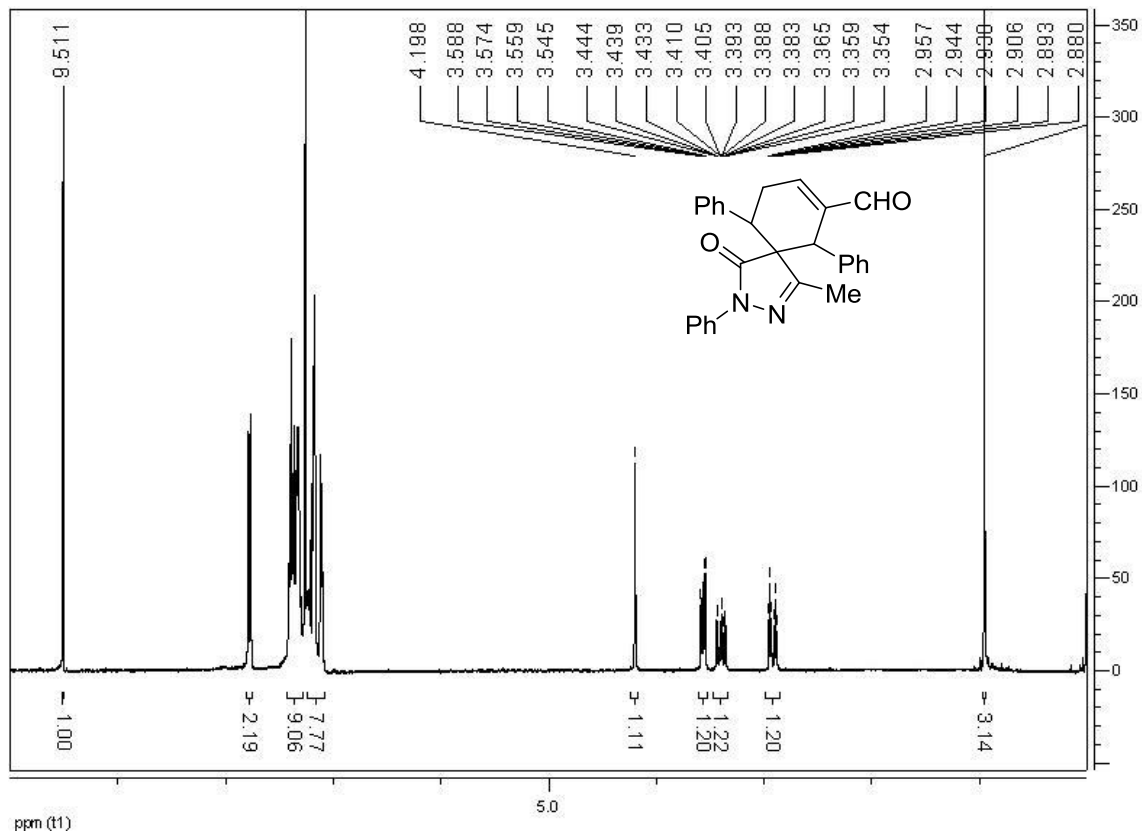

<sup>13</sup>C NMR

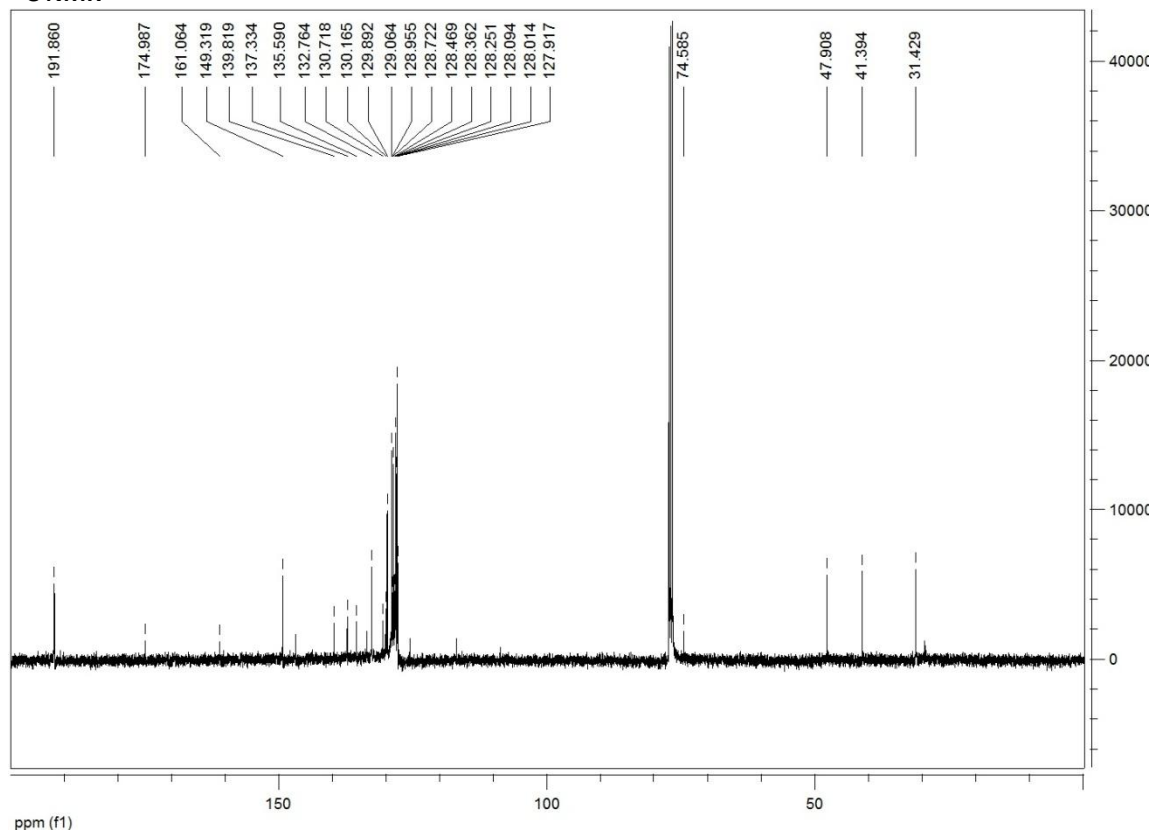

IR

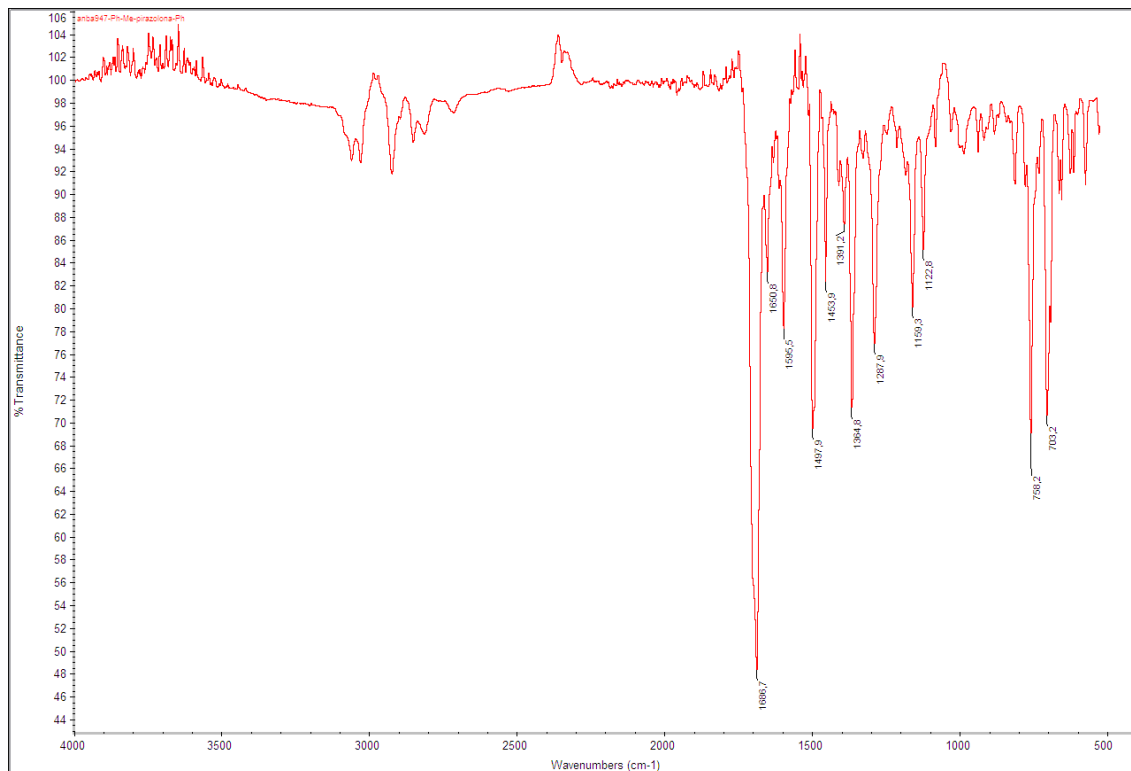

HPLC

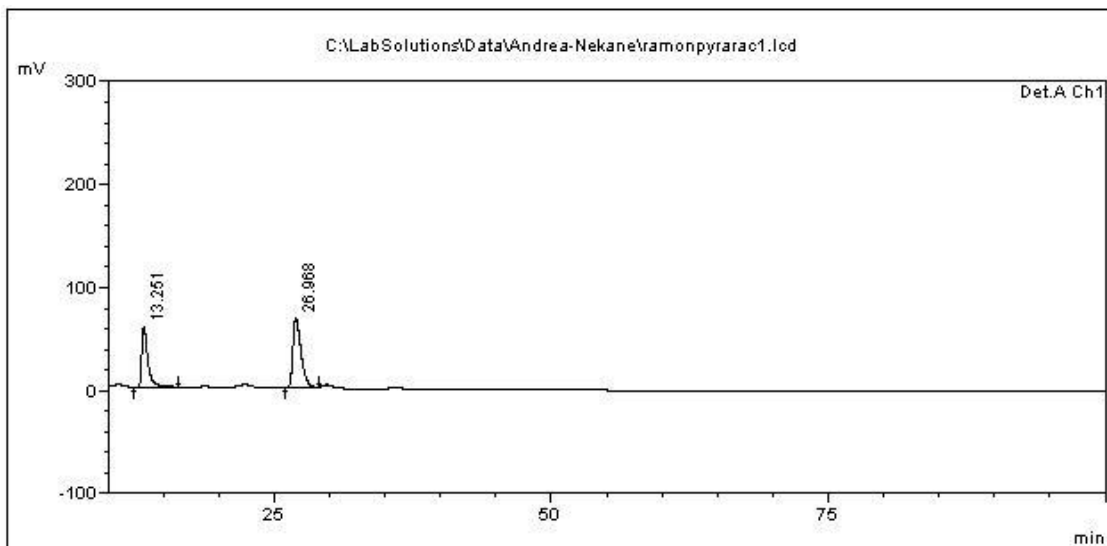

PeakTable

| Peak# | Ret. Time | Area    | Height | Area %  | Height % |
|-------|-----------|---------|--------|---------|----------|
| 1     | 13.251    | 2270990 | 57966  | 39.606  | 46.027   |
| 2     | 26.968    | 3463012 | 67973  | 60.394  | 53.973   |
| Total |           | 5734002 | 125938 | 100.000 | 100.000  |

(S)-Cat.

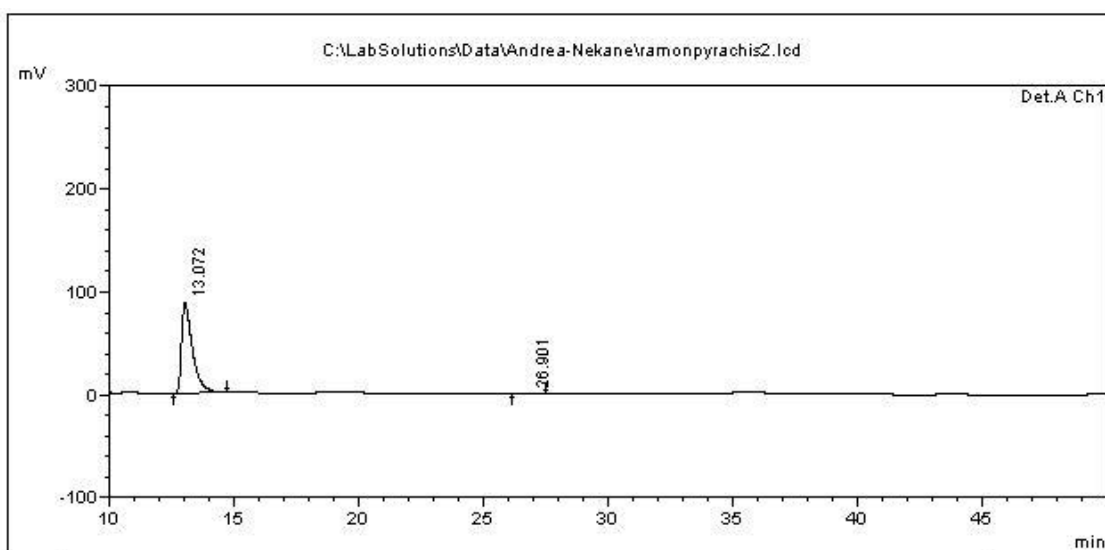

| PeakTable            |           |         |         |
|----------------------|-----------|---------|---------|
| Detector A Ch1 254nm |           |         |         |
| Peak#                | Ret. Time | Area    | Area %  |
| 1                    | 13.072    | 2664818 | 99.847  |
| 2                    | 26.901    | 4070    | 0.153   |
| Total                |           | 2668889 | 100.000 |

(R)-Cat.

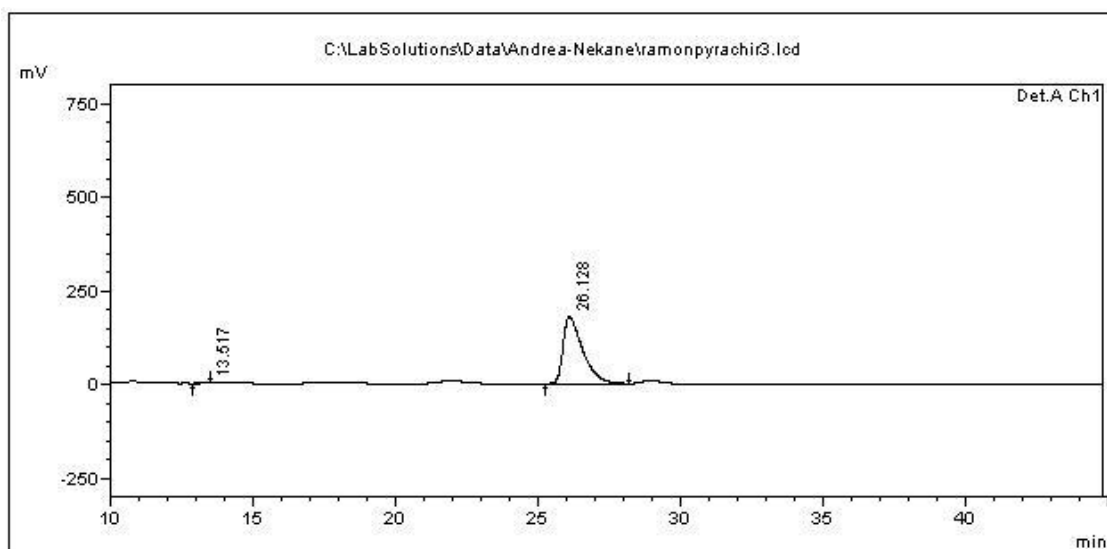

| PeakTable            |           |         |         |
|----------------------|-----------|---------|---------|
| Detector A Ch1 254nm |           |         |         |
| Peak#                | Ret. Time | Area    | Area %  |
| 1                    | 13.517    | 7962    | 0.093   |
| 2                    | 26.128    | 8518875 | 99.907  |
| Total                |           | 8526836 | 100.000 |



3f

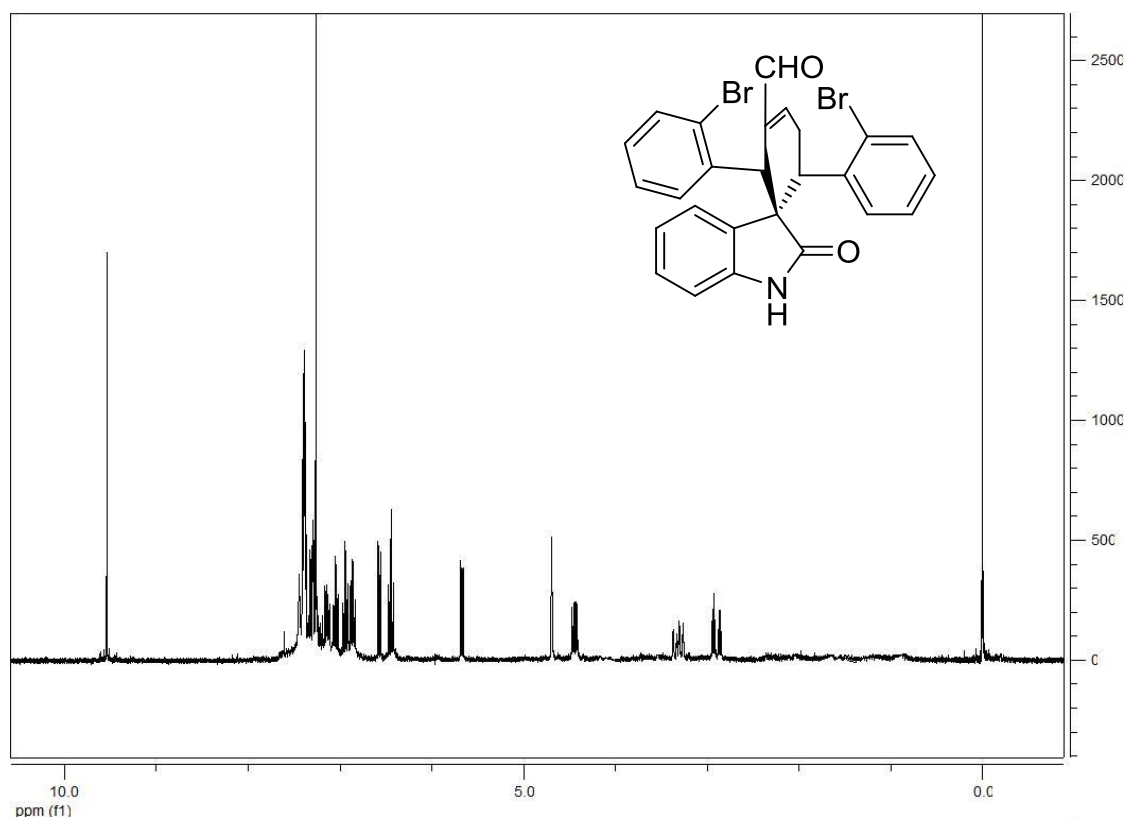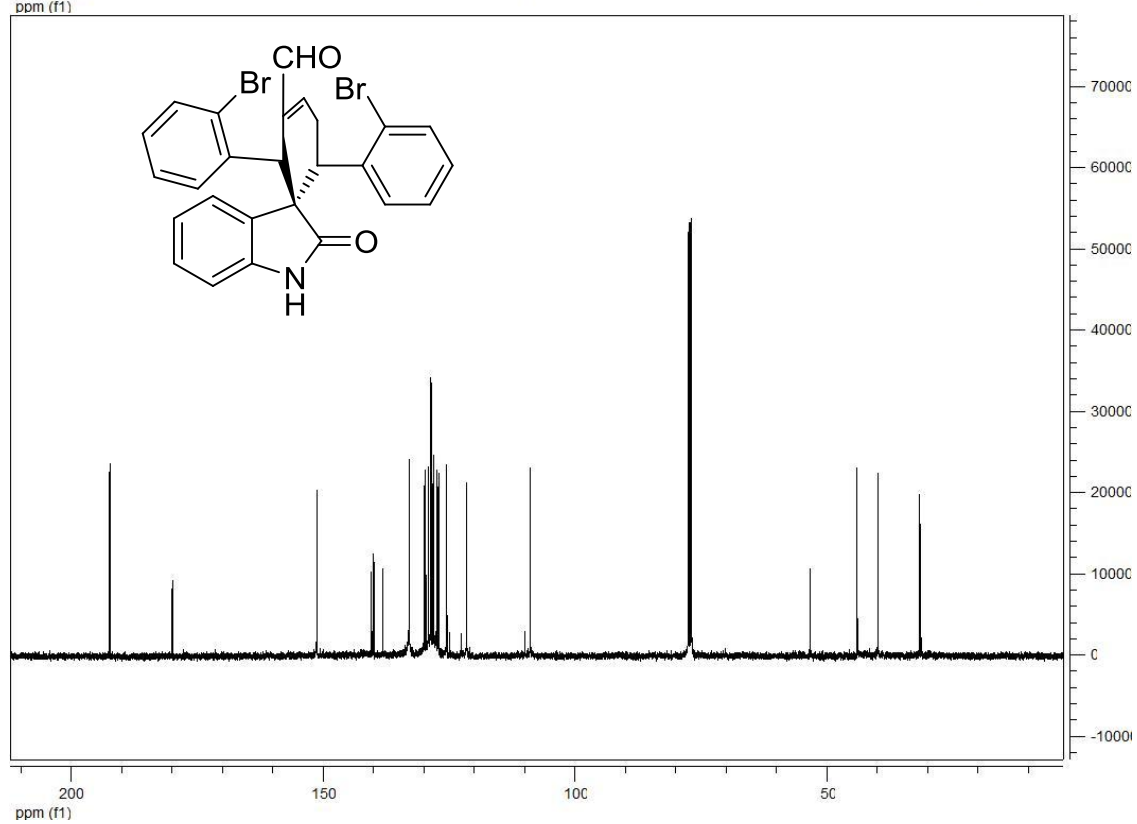

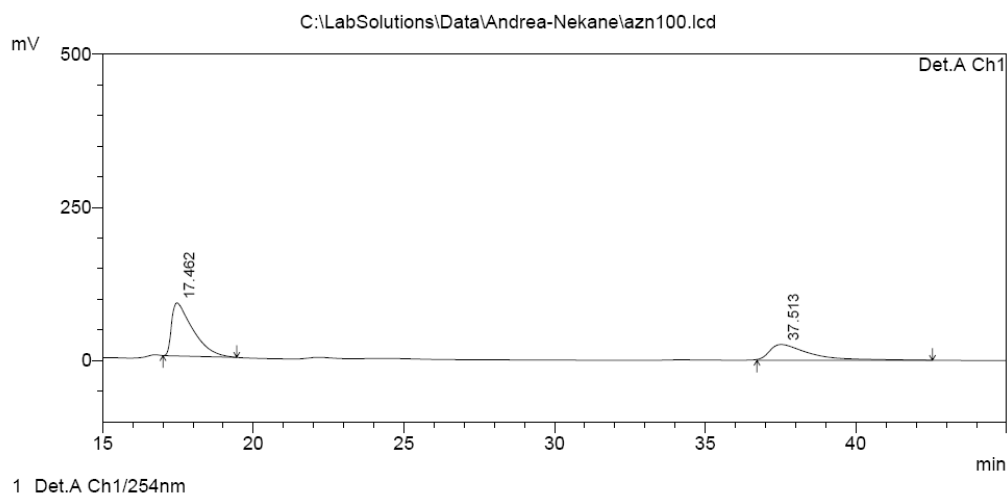

(S)-Catalyst

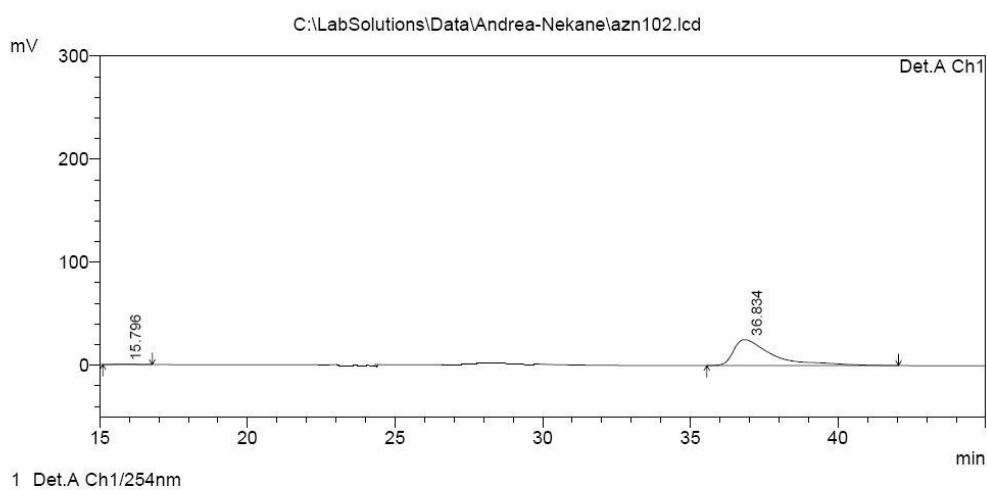

PeakTable

Detector A Ch1 254nm

| Peak# | Ret. Time | Area    | Height | Area %  | Height % |
|-------|-----------|---------|--------|---------|----------|
| 1     | 15.796    | 19510   | 289    | 0.838   | 1.135    |
| 2     | 36.834    | 2309058 | 25197  | 99.162  | 98.865   |
| Total |           | 2328568 | 25486  | 100.000 | 100.000  |

3e

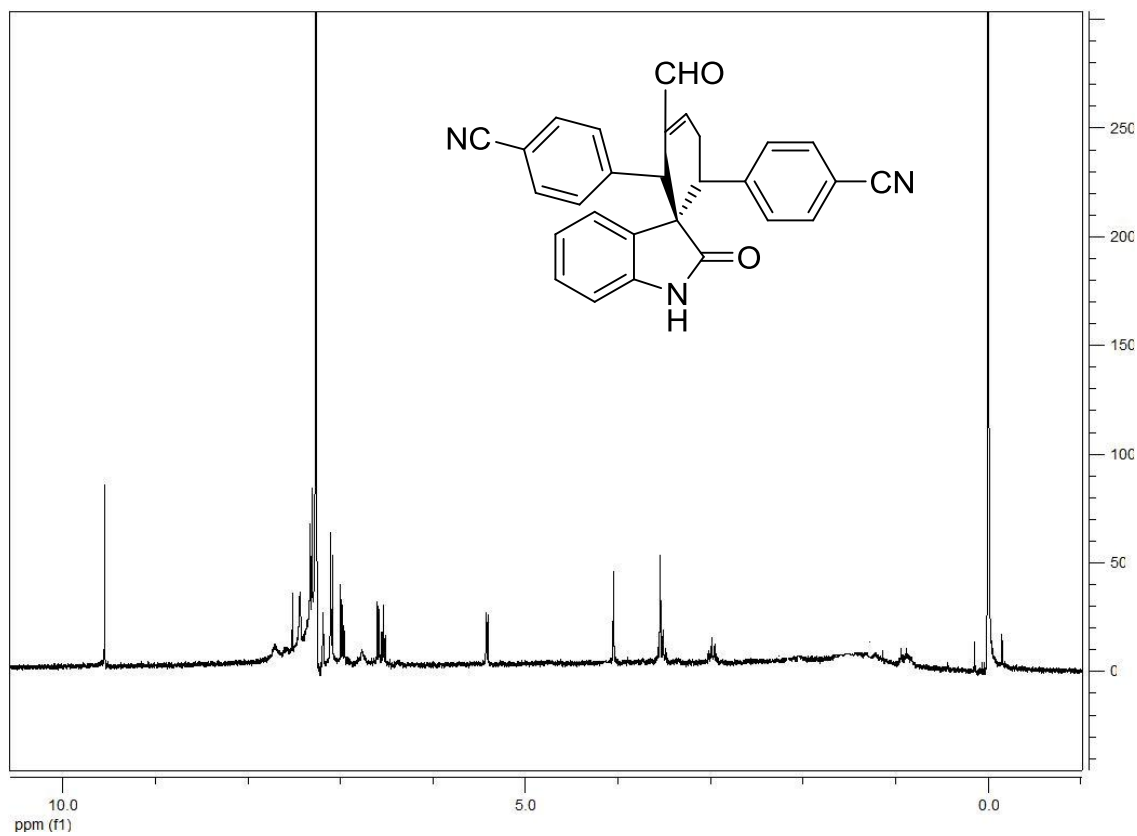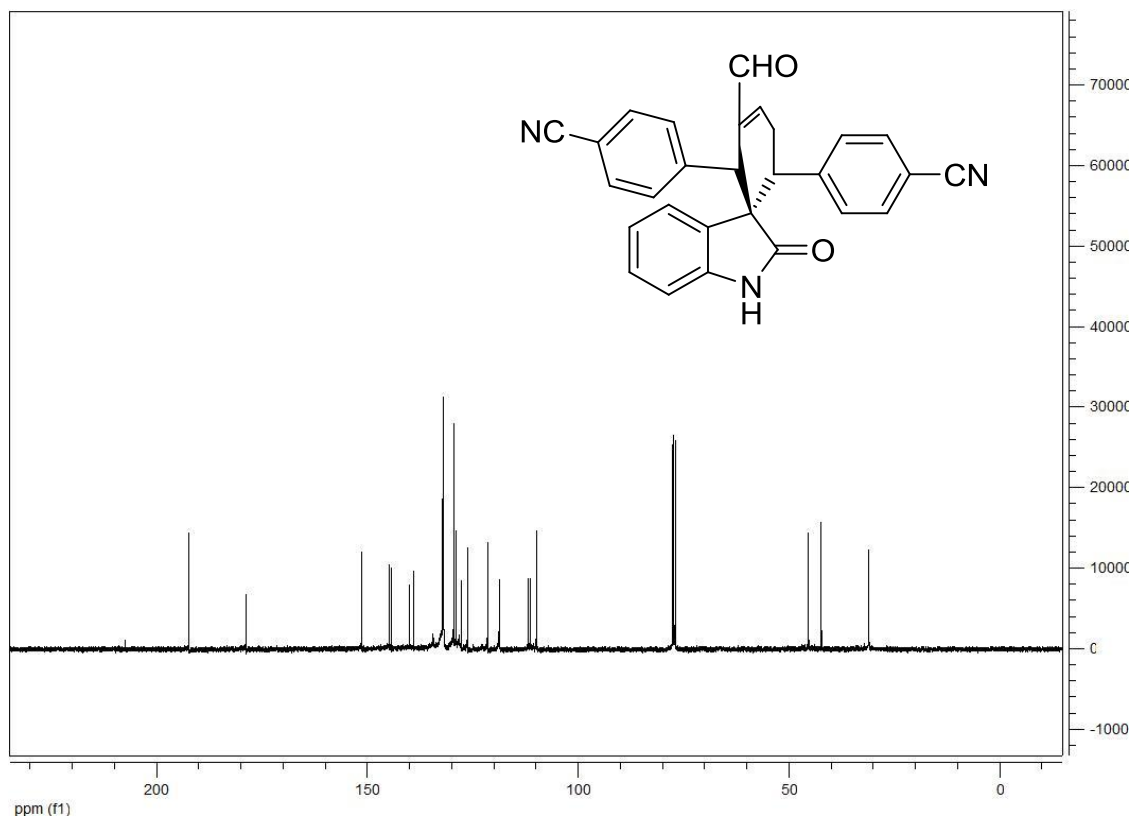

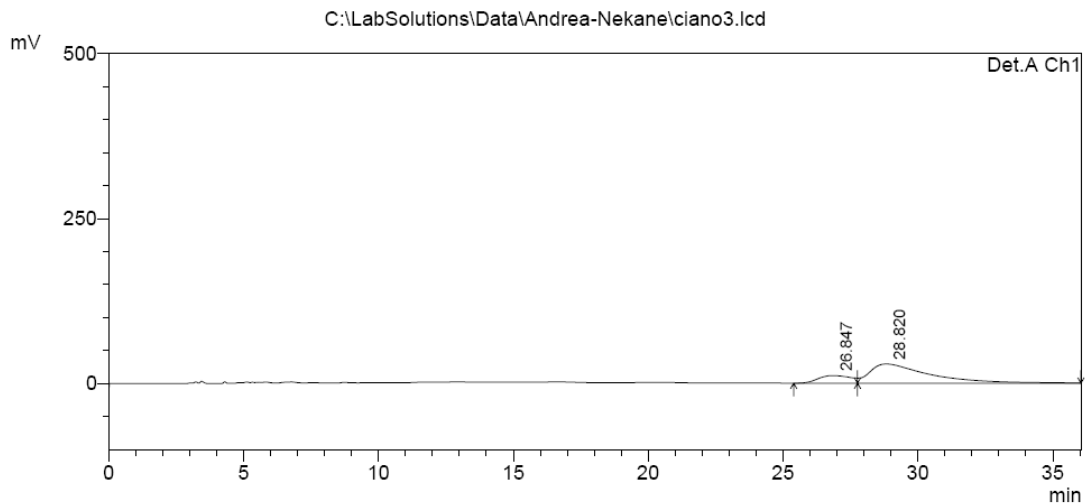

(S)-Catalyst

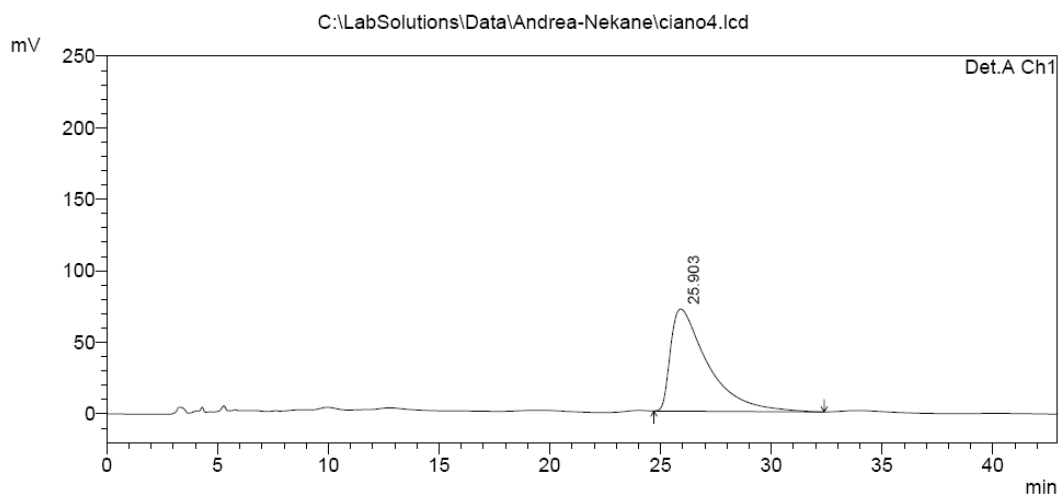

PeakTable

Detector A Ch1 254nm

| Peak# | Ret. Time | Area    | Height | Area %  | Height % |
|-------|-----------|---------|--------|---------|----------|
| 1     | 25.903    | 8367803 | 71449  | 100.000 | 100.000  |
| Total |           | 8367803 | 71449  | 100.000 | 100.000  |

(R)-Catalyst

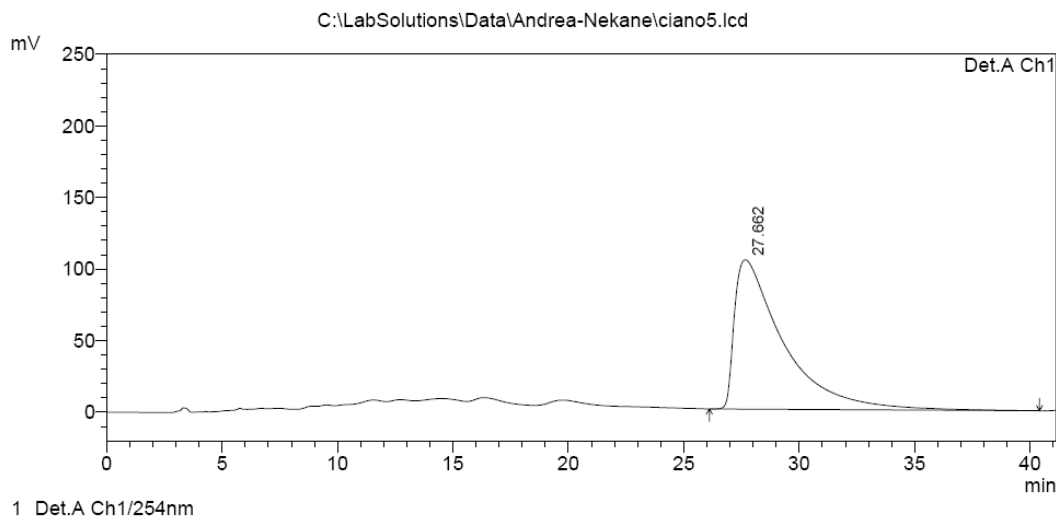

PeakTable

| Peak# | Ret. Time | Area     | Height | Area %  | Height % |
|-------|-----------|----------|--------|---------|----------|
| 1     | 27.662    | 15398153 | 104333 | 100.000 | 100.000  |
| Total |           | 15398153 | 104333 | 100.000 | 100.000  |

<sup>i</sup> For a review on the assignment of the absolute configurations of organic molecules by TD-DFT see: Bringmann, G.; Bruhn, T.; Maksimenka, K.; Hemberger, Y. *Eur. J. Org. Chem.* **2009**, 2717–2727, see also (a) Diedrich, C.; Grimme, S. *J. Phys. Chem. A* **2003**, *107*, 2524; (b) Casarini, D.; Lunazzi, L.; Mancinelli, M.; Mazzanti, A.; Rosini, C. *J. Org. Chem.* **2007**, *72*, 7667; (c) Goel, A.; Singh, F. V.; Kumar, V.; Reichert, M.; Goulder, T. A. M.; Bringmann, G. *J. Org. Chem.* **2007**, *72*, 7765. (d) Stephens, P. J.; Pan, J. J.; Devlin, F. J.; Cheeseman, J. R. *J. Nat. Prod.* **2008**, *71*, 285. (e) Gioia, C. Fini, F.; Mazzanti, A.; Bernardi, L.; Ricci, A. *J. Am. Chem. Soc.* **2009**, *131*, 9614-9615. Bencivenni, G.; Wu, L.Y.; Giannichi, B.; Mazzanti, A.; Pesciaioli, F.; Song, M-P.; Bartoli, G.; Melchiorre, P. *Angew. Chem. Int. Ed.* **2009**, *48*, 7200-7203.

<sup>ii</sup> Gaussian 03, Revision E.01, Frisch, M. J.; Trucks, G. W.; Schlegel, H. B.; Scuseria, G. E.; Robb, M. A.; Cheeseman, J. R.; Montgomery, Jr., J. A.; Vreven, T.; Kudin, K. N.; Burant, J. C.; Millam, J. M.; Iyengar, S. S.; Tomasi, J.; Barone, V.; Mennucci, B.; Cossi, M.; Scalmani, G.; Rega, N.; Petersson, G. A.; Nakatsuji, H.; Hada, M.; Ehara, M.; Toyota, K.; Fukuda, R.; Hasegawa, J.; Ishida, M.; Nakajima, T.; Honda, Y.; Kitao, O.; Nakai, H.; Klene, M.; Li, X.; Knox, J. E.; Hratchian, H. P.; Cross, J. B.; Bakken, V.; Adamo, C.; Jaramillo, J.; Gomperts, R.; Stratmann, R. E.; Yazyev, O.; Austin, A. J.; Cammi, R.; Pomelli, C.; Ochterski, J. W.; Ayala, P. Y.; Morokuma, K.; Voth, G. A.; Salvador, P.; Dannenberg, J. J.; Zakrzewski, V. G.; Dapprich, S.; Daniels, A. D.; Strain, M. C.; Farkas, O.; Malick, D. K.; Rabuck, A. D.; Raghavachari, K.; Foresman, J. B.; Ortiz, J. V.; Cui, Q.; Baboul, A. G.; Clifford, S.; Cioslowski, J.; Stefanov, B. B.; Liu, G.; Liashenko, A.; Piskorz, P.; Komaromi, I.; Martin, R. L.; Fox, D. J.; Keith, T.; Al-Laham, M. A.; Peng, C. Y.; Nanayakkara, A.; Challacombe, M.; Gill, P. M. W.; Johnson, B.; Chen, W.; Wong, M. W.; Gonzalez, C.; Pople, J. A.; Gaussian, Inc., Wallingford CT, 2004.

<sup>iii</sup> Pescitelli, G.; Di pietro, S.; Cardellicchio, C.; Annunziata, M.; capozzi, M.; Di Bari, L. *J. Org. Chem.* **2010**, *75*, 1143-1154

<sup>iv</sup> The use of a moderate basis set is dictated by the molecular size, and by the need of limiting the computational time (about 24-48 hours on a 8-core Xeon server)

<sup>v</sup> Stephens, P.J.; McCann, D.M.; Devlin, F.J., Cheeseman, J.R.; Frisch, M.J. *J.Am.Chem.Soc.* **2004**, *126*, 7514-7521

<sup>vi</sup> Gaussview 4.1.2, Semichem Inc., 2006
